# Supplementary material
Source: PubMed Central journal article supplement (PMC8427535)
Supplement: NEJMoa2110475_appendix.pdf [file NEJMoa2110475_appendix.pdf]

## Supplementary Appendix

This appendix has been provided by the authors to give readers additional information about their work.

Supplement to: Barda N, Dagan N, Ben-Shlomo Y, et al. Safety of the BNT162b2 mRNA Covid-19 vaccine in a nationwide setting. *N Engl J Med*. DOI: [10.1056/NEJMoa2110475](https://doi.org/10.1056/NEJMoa2110475)

## Supplementary Materials

### Safety of the BNT162b2 mRNA Covid-19 Vaccine in a Nationwide Setting

Noam Barda, MD<sup>\*1,2,3,4</sup>; Noa Dagan, MD<sup>\*1,2,3,4</sup>; Yatir Ben-Shlomo BSc<sup>1</sup>, Eldad Kepten, PhD<sup>1</sup>; Jacob Waxman, MD<sup>1</sup>; Reut Ohana, MSc<sup>1</sup>; Miguel A. Hernán, MD<sup>5,6</sup>; Marc Lipsitch, DPhil<sup>7</sup>; Isaac Kohane, MD<sup>3,4</sup>; Doron Netzer, MD<sup>8</sup>; Ben Y. Reis, PhD<sup>\*\*4,9,10</sup>; Ran D. Balicer, MD<sup>1,4,11\*\*</sup>

<sup>1</sup> Clalit Research Institute, Innovation Division, Clalit Health Services, Tel Aviv, Israel

<sup>2</sup> Software and Information Systems Engineering, Ben Gurion University, Be'er Sheva, Israel

<sup>3</sup> Department of Biomedical Informatics, Harvard Medical School, Boston, MA, USA

<sup>4</sup> The Ivan and Francesca Berkowitz Family Living Laboratory Collaboration at Harvard Medical School and Clalit Research Institute

<sup>5</sup> Departments of Epidemiology and Biostatistics, Harvard T.H. Chan School of Public Health, Boston, MA, USA

<sup>6</sup> CAUSALab, Harvard T.H. Chan School of Public Health, Boston, MA, USA

<sup>7</sup> Center for Communicable Disease Dynamics, Department of Epidemiology and Department of Immunology and Infectious Diseases, Harvard T.H. Chan School of Public Health, Boston, MA, USA

<sup>8</sup> Community Medical Services Division, Clalit Health Services, Arlozorov 101, Tel Aviv, Israel

<sup>9</sup> Predictive Medicine Group, Computational Health Informatics Program, Boston Children's Hospital, Boston, MA, USA

<sup>10</sup> Harvard Medical School, Boston, MA, USA

<sup>11</sup> School of Public Health, Faculty of Health Sciences, Ben Gurion University of the Negev, Be'er Sheva, Israel

\* These authors contributed equally.

\*\* These authors contributed equally.

#### Corresponding Author:

Ran D. Balicer, MD, PhD, MPH

Clalit Research Institute, Innovation Division, Clalit Health Services, Tel Aviv, Israel

[Rbalicer@clalit.org.il](mailto:Rbalicer@clalit.org.il)

## Contents

|                                                                                                                                                          |    |
|----------------------------------------------------------------------------------------------------------------------------------------------------------|----|
| Supplementary Methods 1 – The target trial .....                                                                                                         | 1  |
| Figure S1 – Cumulative incidence curves.....                                                                                                             | 3  |
| Table S1 – Definitions of variables used for the exposure, eligibility and adjustment.....                                                               | 16 |
| Table S2 – Definition of outcomes.....                                                                                                                   | 23 |
| Table S3 – Population characteristics of the eligible cohorts of vaccinated and infected individuals .                                                   | 25 |
| Table S4 – Outcome specific population tables for the vaccination exposure analyses .....                                                                | 27 |
| Table S5 – Outcome specific population tables for the SARS-CoV-2 exposure analyses .....                                                                 | 52 |
| Table S6 – Risk ratios and risk differences (per 100,000 persons) of potential adverse outcomes for SARS-CoV-2 vaccination and SARS-CoV-2 Infection..... | 77 |

## Supplementary Methods 1 – The target trial

In the main text we simplified the specification of the interventions of the target trial as vaccination vs. no vaccination. A more precise specification of the interventions would be “vaccination and no exposure to SARS-CoV-2” vs. “no vaccination and no exposure to SARS-CoV-2”. That is, we sought to emulate a target trial in which individuals are assigned to either a vaccination or no vaccination, and in which all individuals in both arms are assigned to no coronavirus infection. This target trial is implicit in most observational studies of vaccine safety, which attempt to estimate the direct effects of vaccination that are not mediated through the vaccine’s preventive effect on infection.

Otherwise, if the target trial allowed individuals to be exposed to SARS-CoV-2, we would likely observe that, for example, the vaccine protects against pneumonia because the vaccine protects against SARS-CoV-2 infection, which in turn causes pneumonia. If pneumonia was (theoretically) an adverse event of the vaccine, this effect could potentially be masked by the protective effect of the vaccine against the infection. In addition, if the target trial allowed individuals to be exposed to SARS-CoV-2, the incidence of the events mediated by SARS-CoV-2 infection would depend on the background rate of SARS-CoV-2 infection in the study population, which would make the effect estimates highly dependent on pandemic activity during the follow-up period.

To emulate a target trial in the absence of coronavirus infection, we censored individuals at the time of a documented SARS-CoV-2 infection diagnosis. Two potential issues arise from this approach: First, as mentioned in the manuscript text, some infections may not be documented, meaning that some of the effects observed may indeed be mediated through SARS-CoV-2 infection. Second, conditional on the matched covariates, uncensored individuals are assumed to have a risk similar to that

of the censored individuals had they not been infected, an assumption we have no reason to believe would be grossly violated in the present setting.

# Figure S1 – Cumulative incidence curves

Cumulative incidence curves (one minus the Kaplan-Meier plot) for each of the two exposures for the different outcomes starting from the day of the first dose. Shaded areas are 95% confidence intervals. The tables below each curve show the number at risk at each time point and the cumulative number of events.

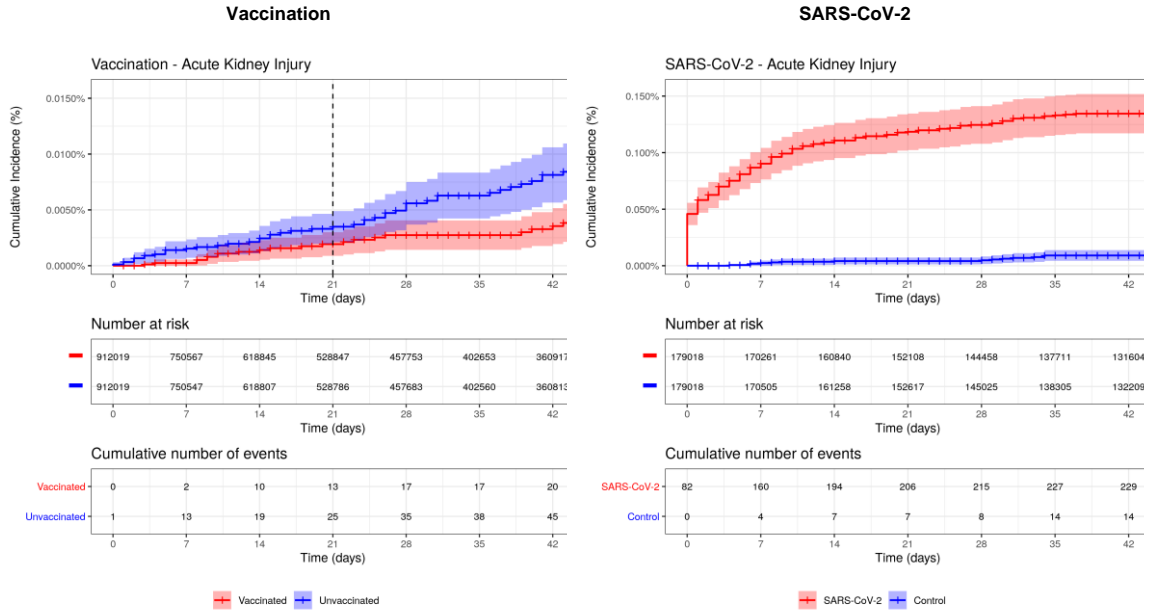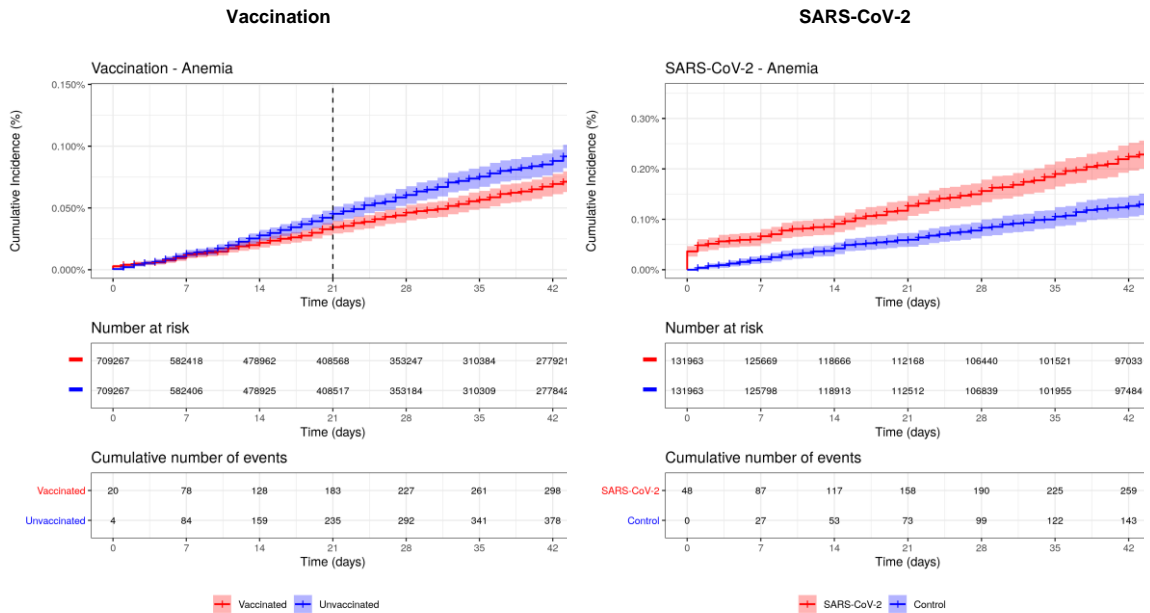

### Vaccination

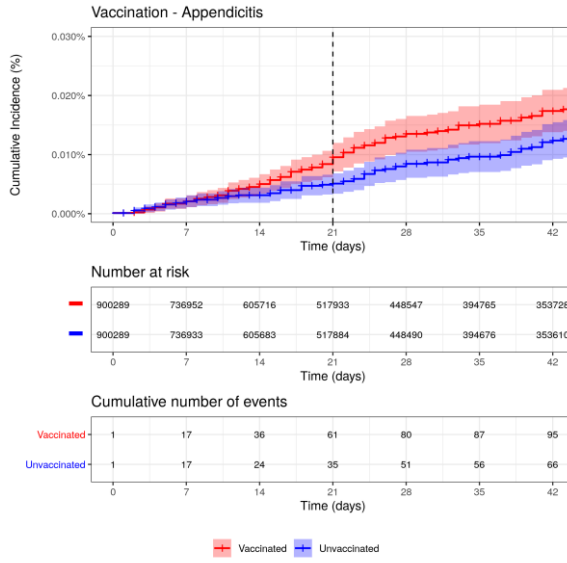

### SARS-CoV-2

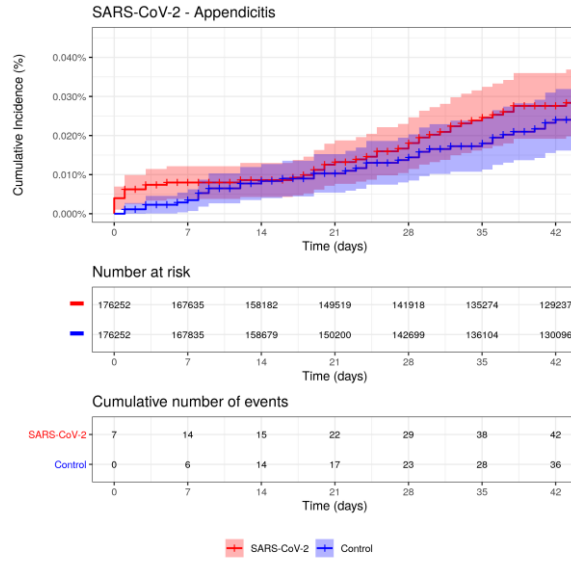

### Vaccination

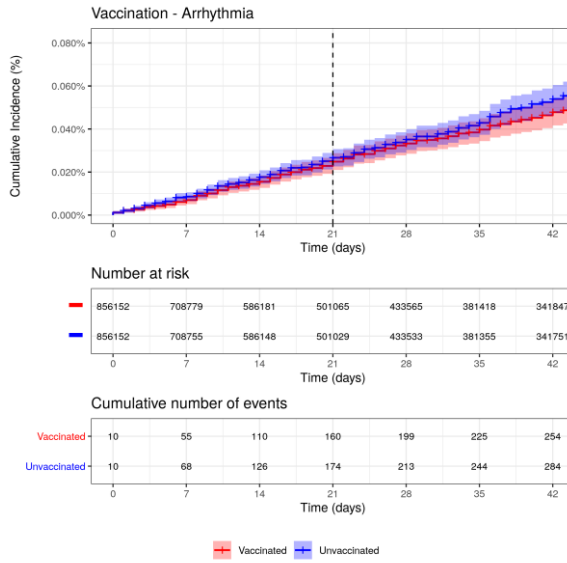

### SARS-CoV-2

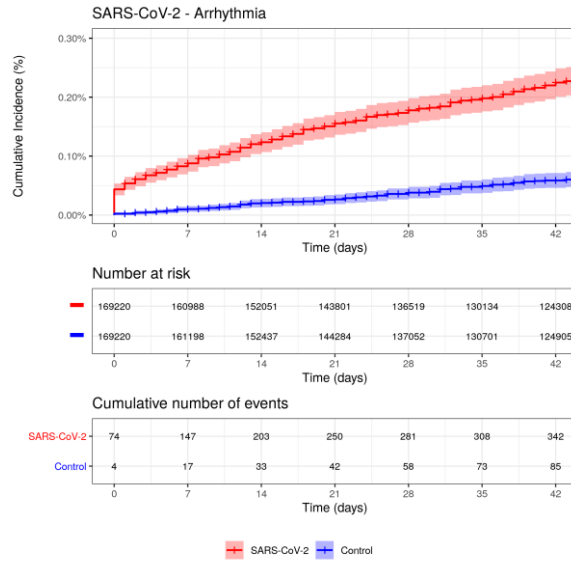

### Vaccination

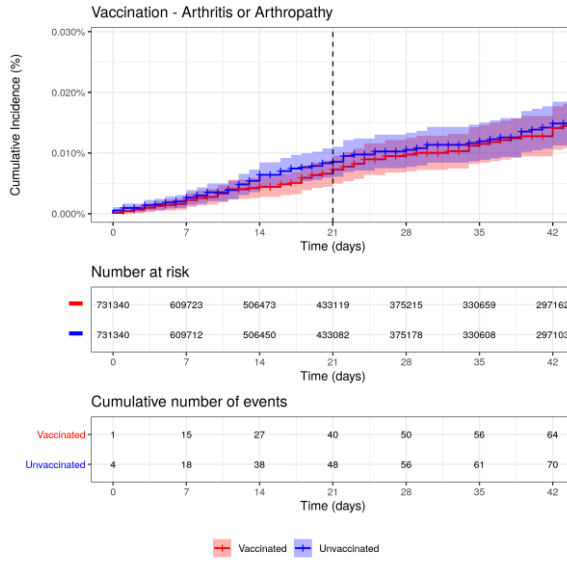

### SARS-CoV-2

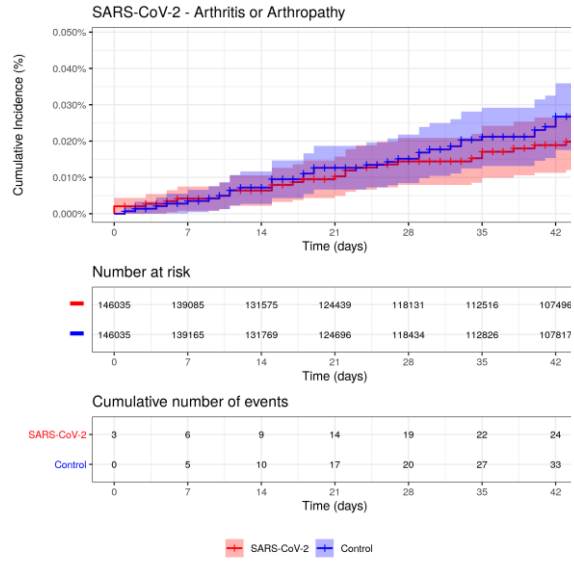

### Vaccination

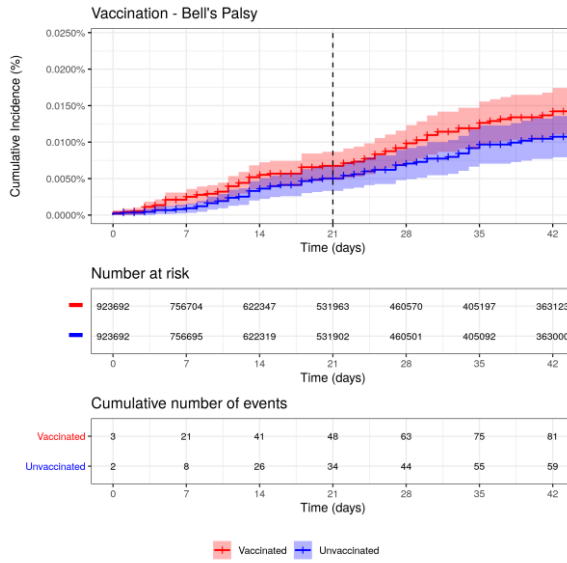

### SARS-CoV-2

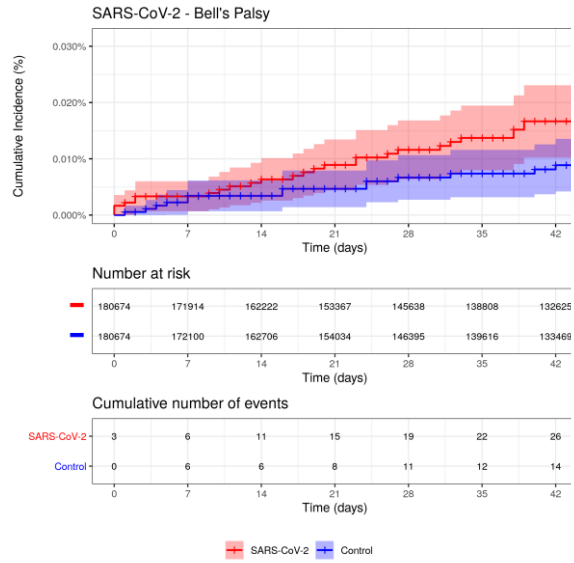



### Vaccination

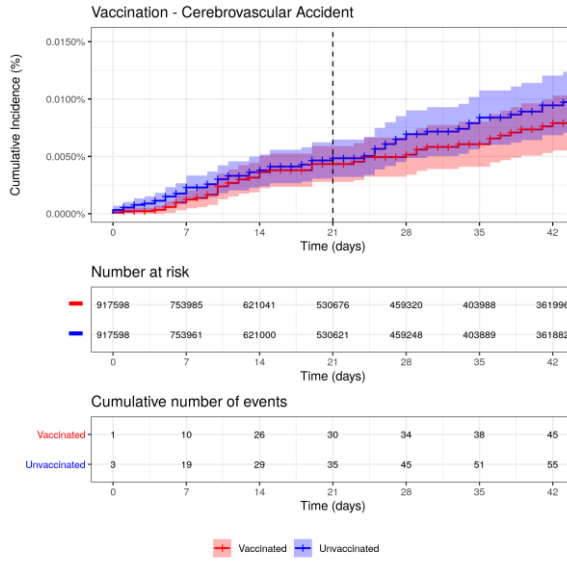

### SARS-CoV-2

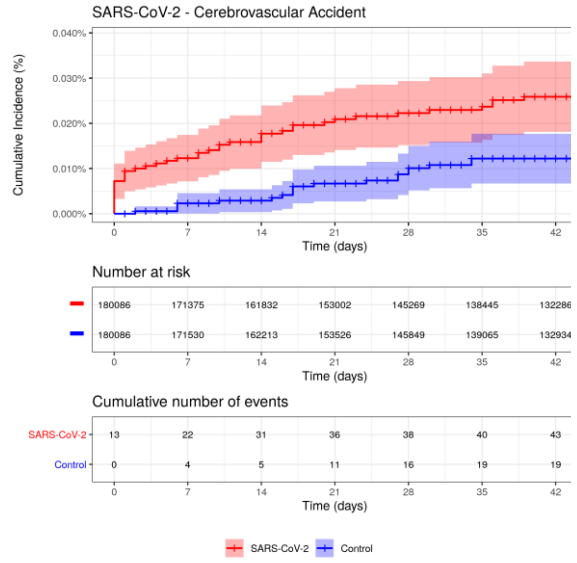

### Vaccination

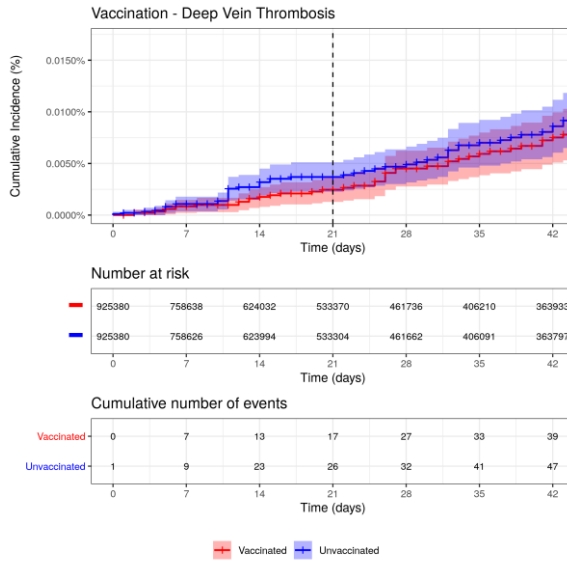

### SARS-CoV-2

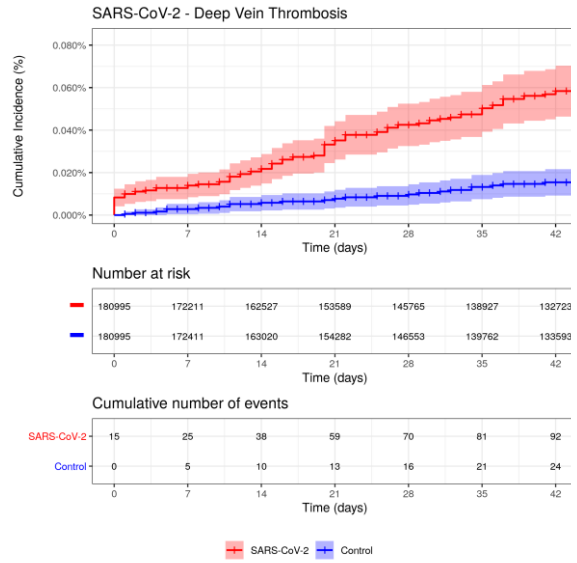

### Vaccination

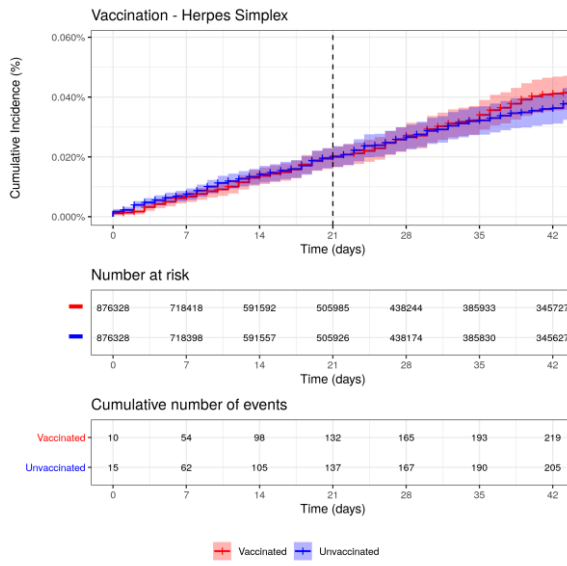

### SARS-CoV-2

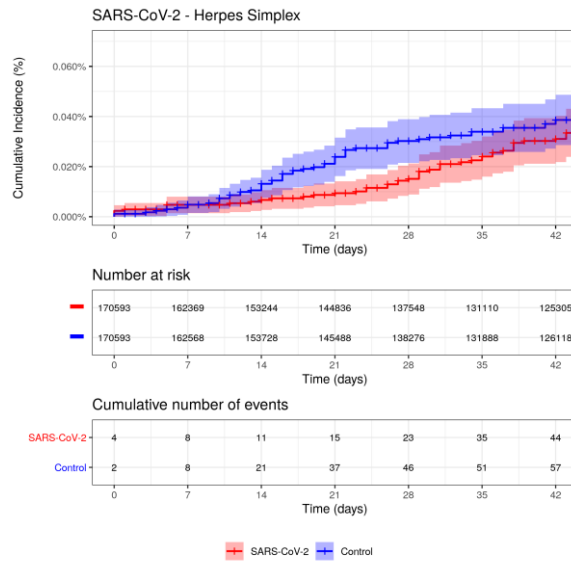

### Vaccination

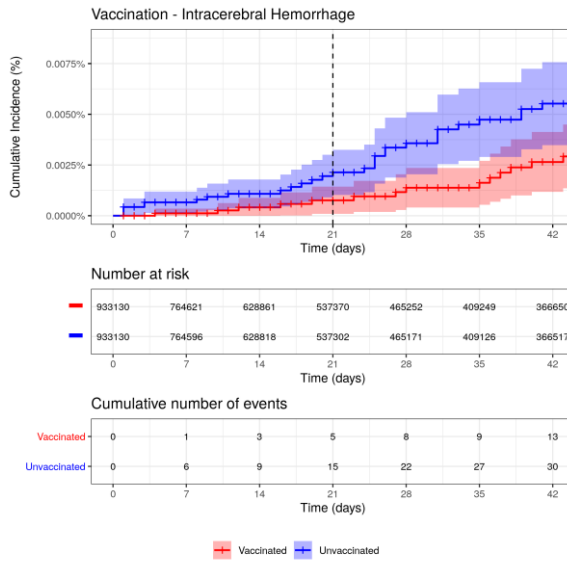

### SARS-CoV-2

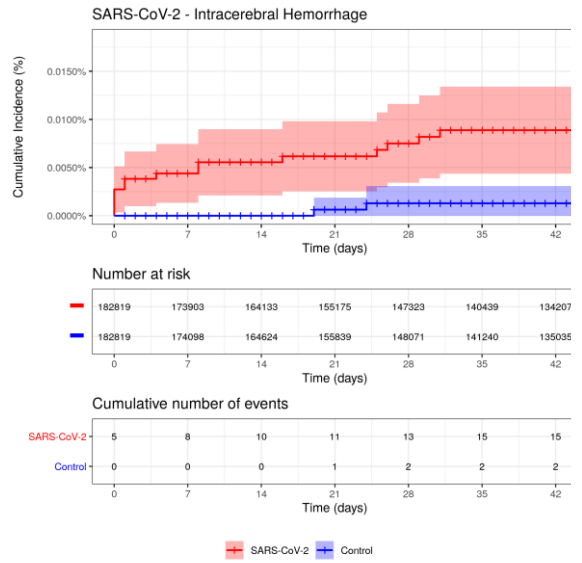

### Vaccination

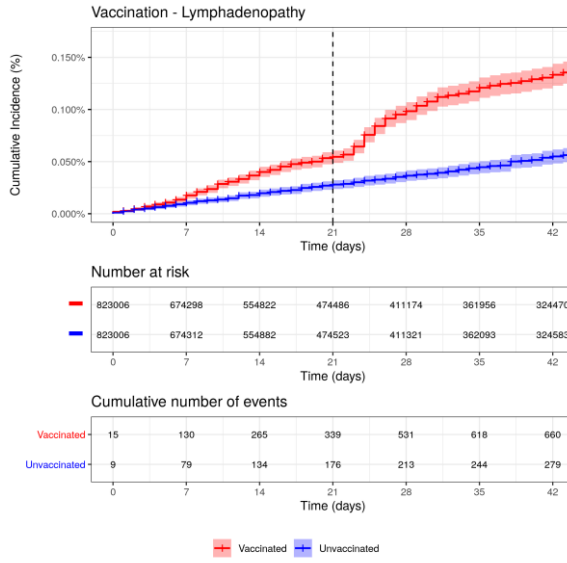

### SARS-CoV-2

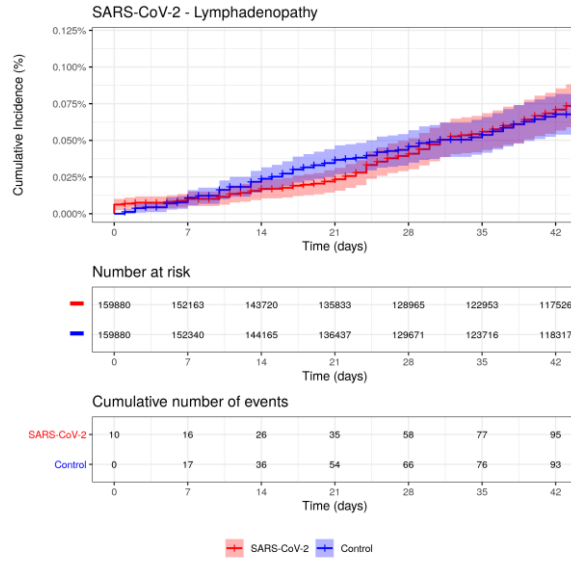

### Vaccination

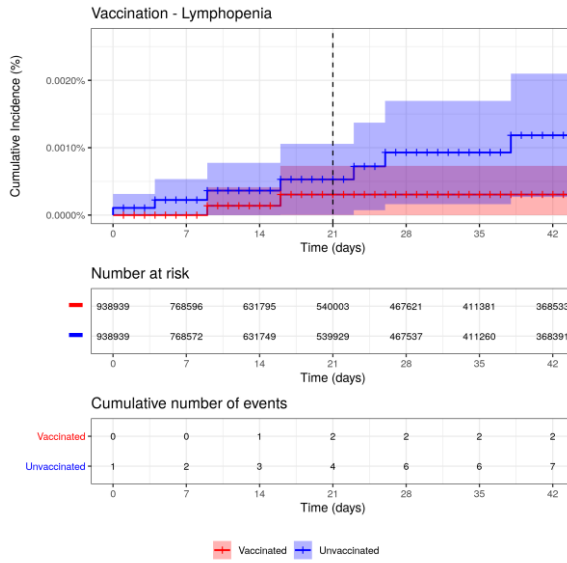

### SARS-CoV-2

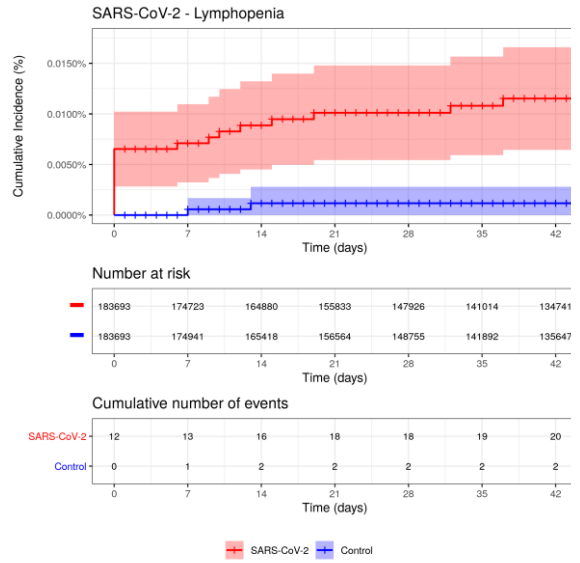

### Vaccination

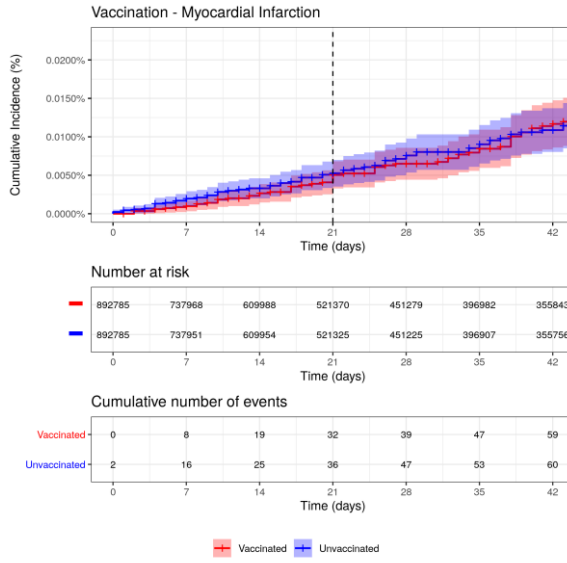

### SARS-CoV-2

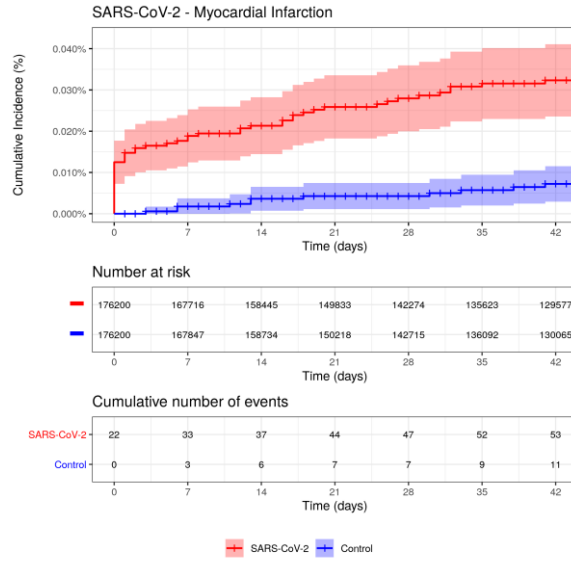

### Vaccination

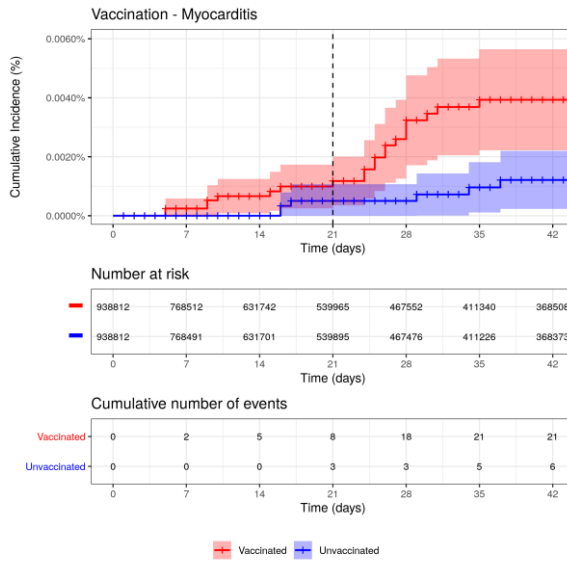

### SARS-CoV-2

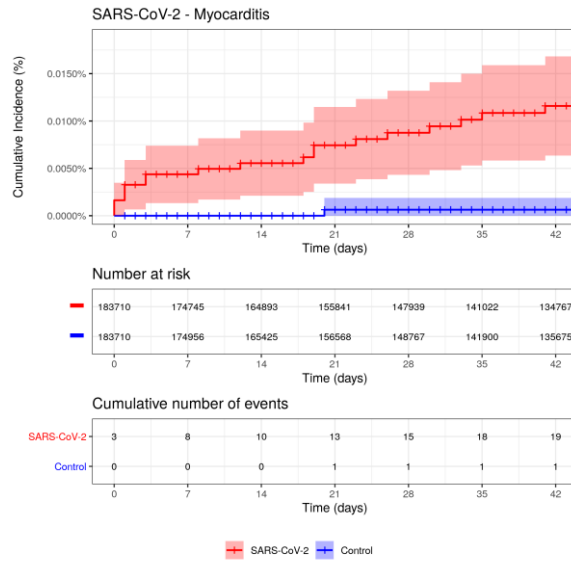

### Vaccination

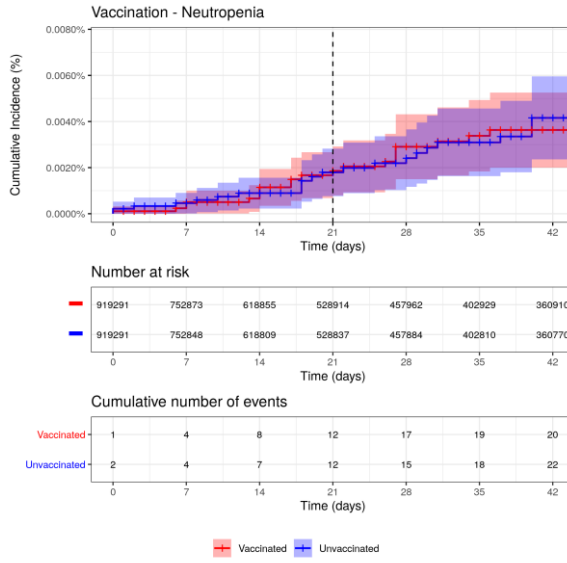

### SARS-CoV-2

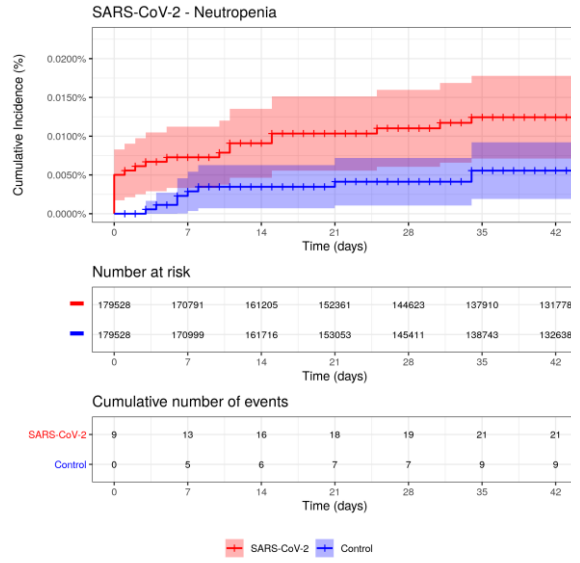

### Vaccination

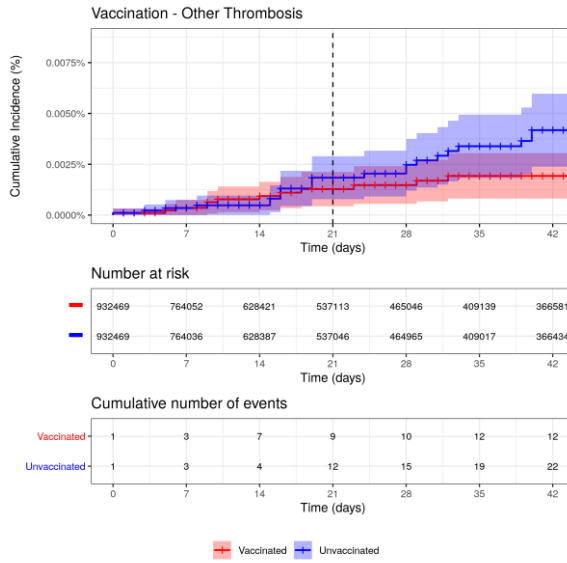

### SARS-CoV-2

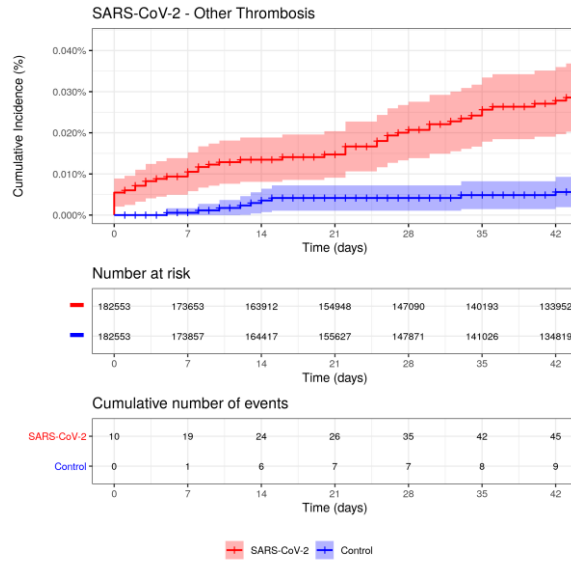

### Vaccination

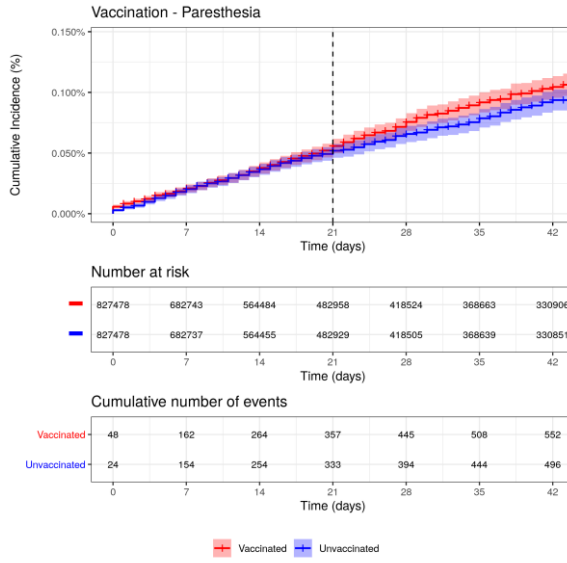

### SARS-CoV-2

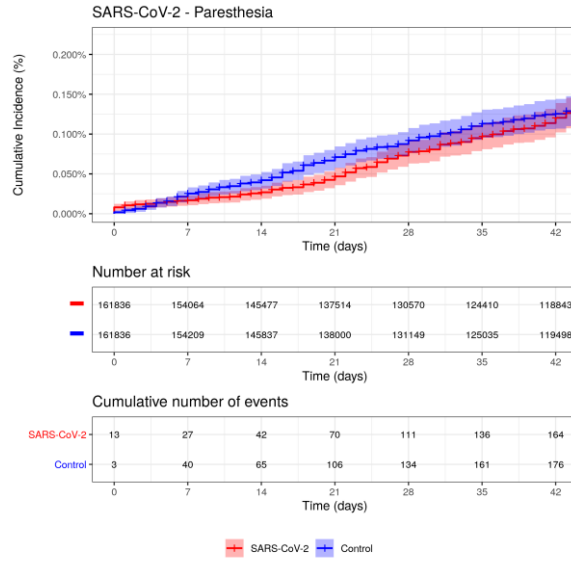

### Vaccination

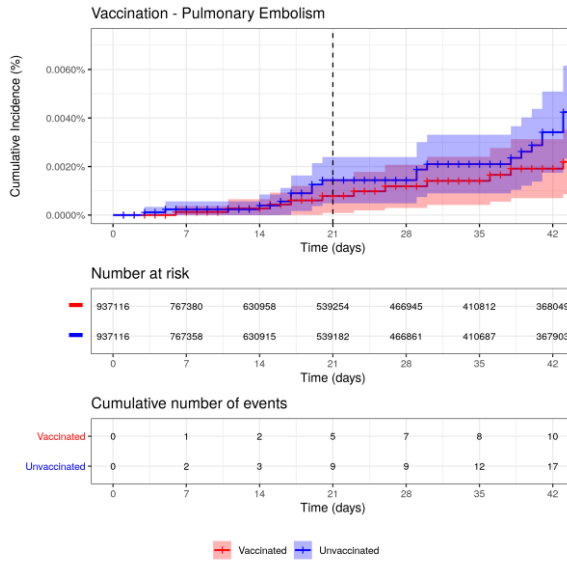

### SARS-CoV-2

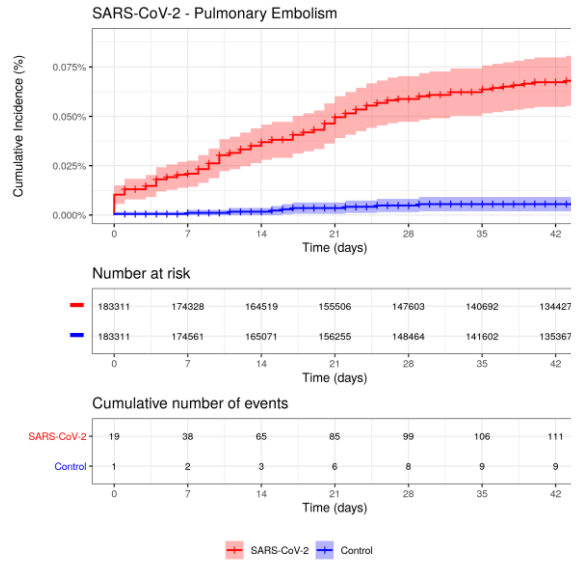

### Vaccination

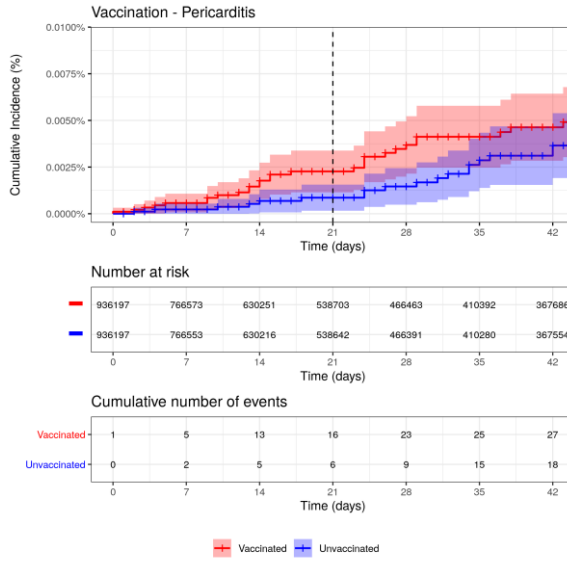

### SARS-CoV-2

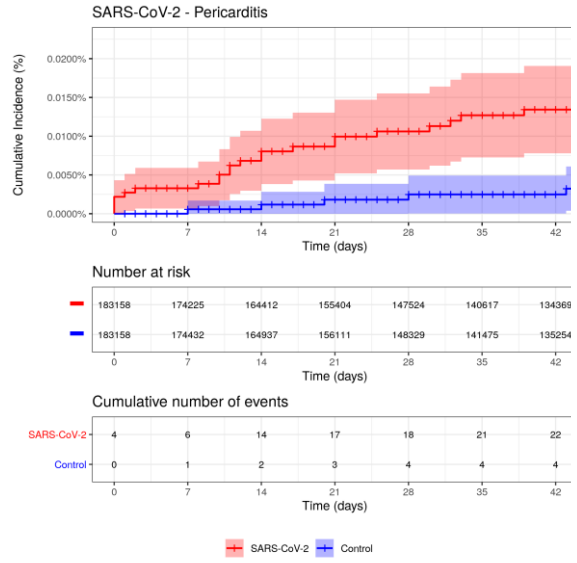

### Vaccination

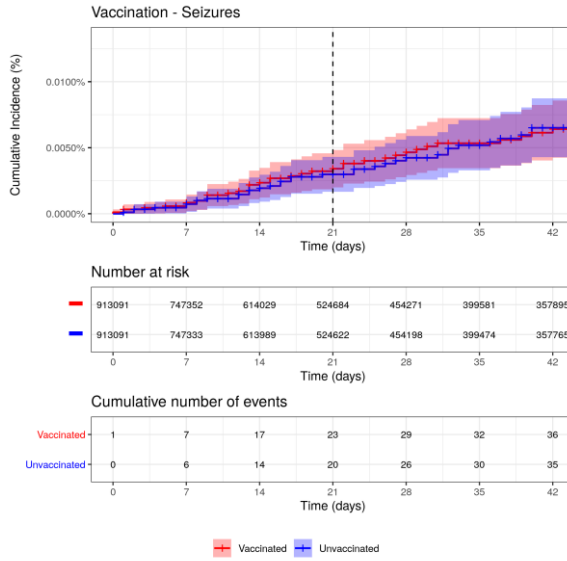

### SARS-CoV-2

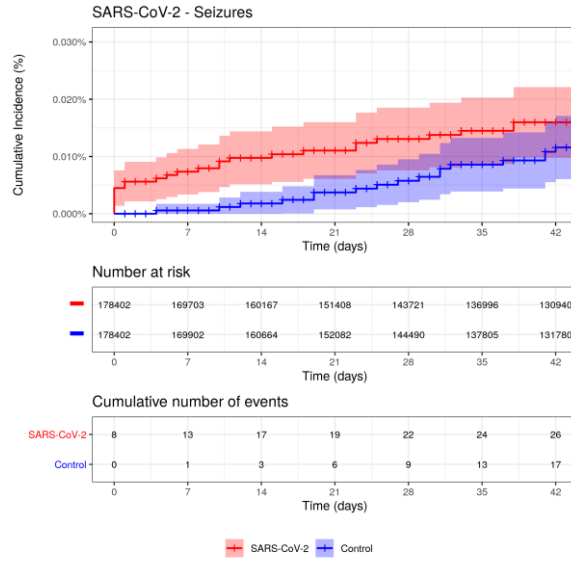

### Vaccination

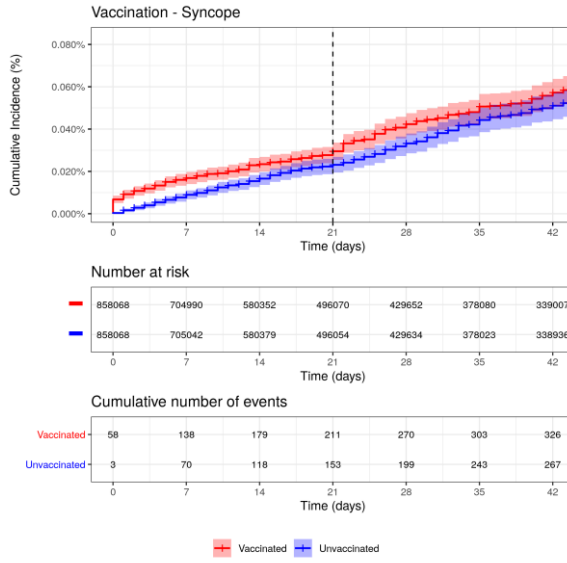

### SARS-CoV-2

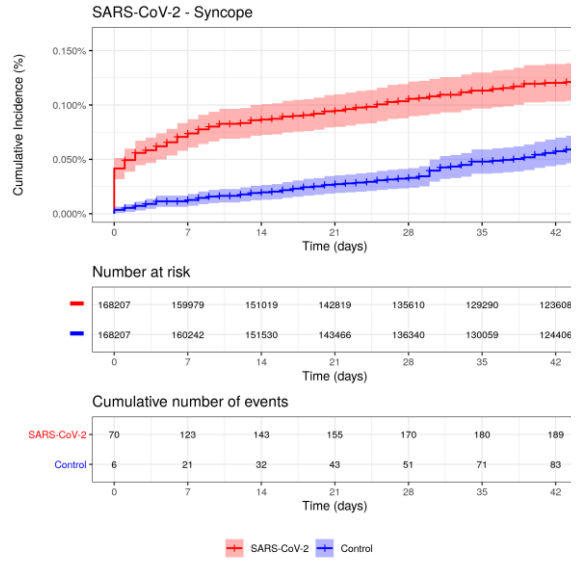

### Vaccination

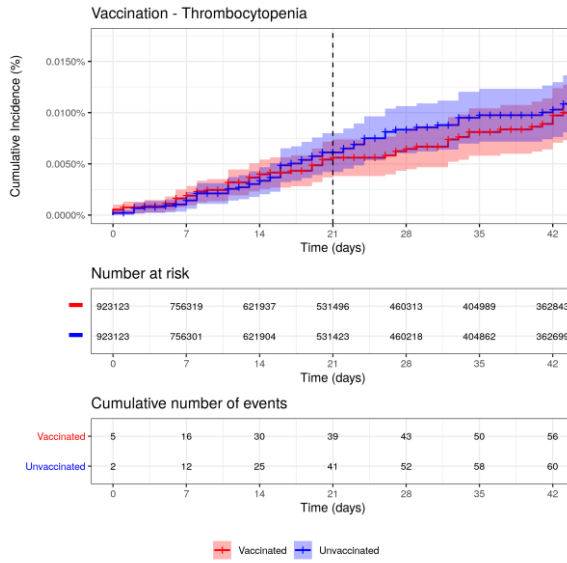

### SARS-CoV-2

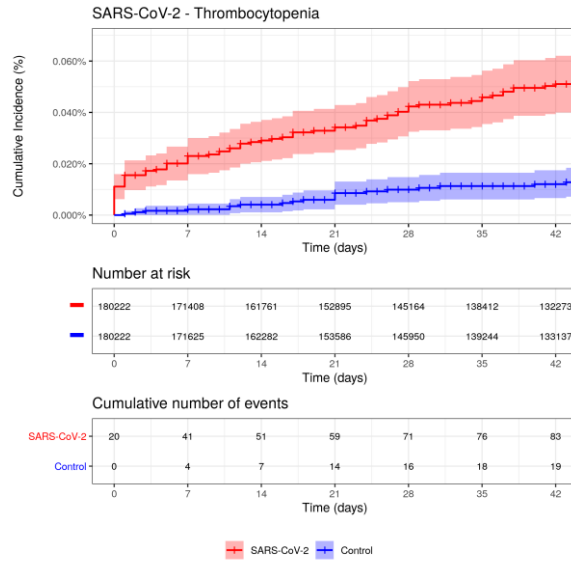



### Vaccination

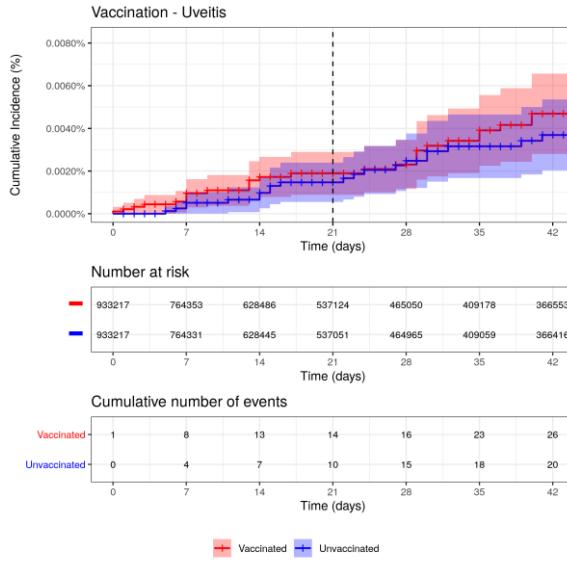

### SARS-CoV-2

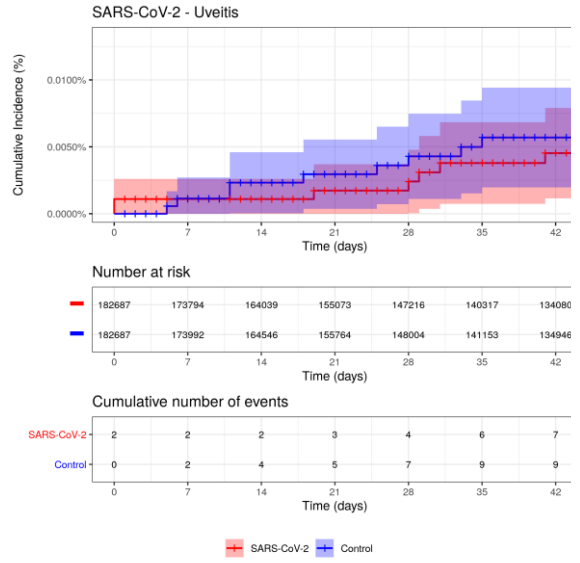

### Vaccination

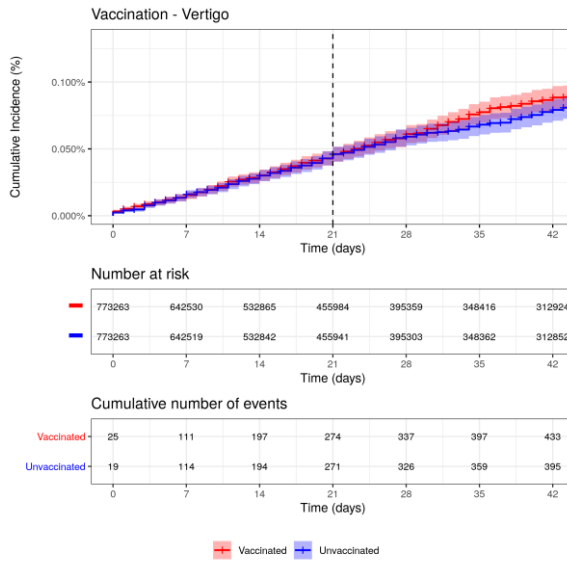

### SARS-CoV-2

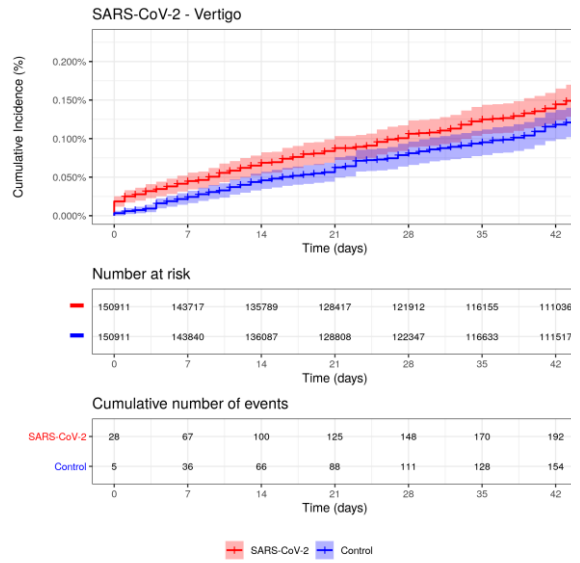

### Vaccination

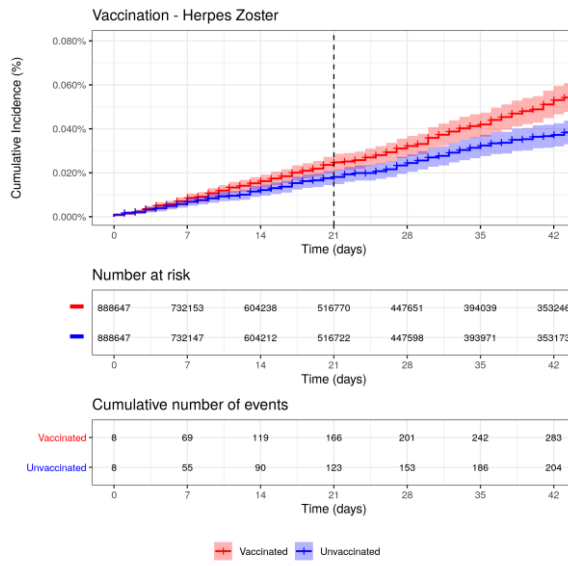

### SARS-CoV-2

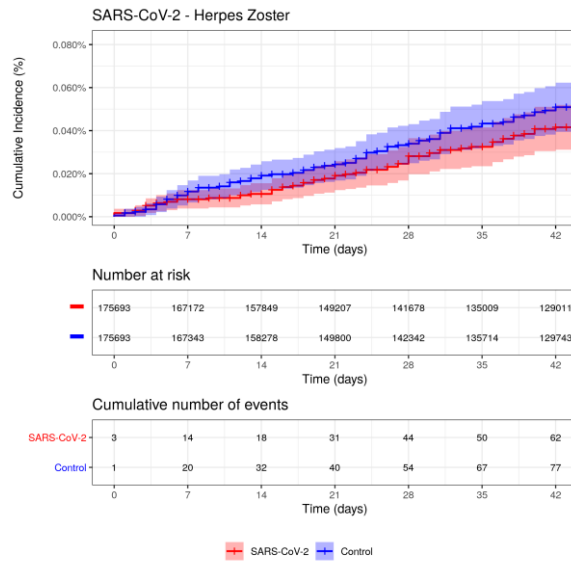

Table S1 – Definitions of variables used for the exposure, eligibility and adjustment

Names, potential values, definitions and time periods for all variables used in the study to define exposure, eligibility and perform adjustment. Variables were defined using internal CHS registries, ICD-9 codes, and ATC codes. PCR: Polymerase Chain Reaction; CHS: Clalit Health Services; ICD: International Classification of Disease; ATC: Anatomic therapeutic chemical; COPD: Chronic Obstructive Pulmonary Disease.

| Variable                                         | Values           | Definitions <sup>1</sup>                                                                                  | Timing <sup>2</sup>                                                          |
|--------------------------------------------------|------------------|-----------------------------------------------------------------------------------------------------------|------------------------------------------------------------------------------|
| <b>Exposure</b>                                  |                  |                                                                                                           |                                                                              |
| SARS-CoV-2 Vaccination                           | 0/1              | Vaccination using the BNT162b2 mRNA Covid-19 Vaccine                                                      | The date of administration of the first dose.                                |
| Documented SARS-CoV-2 Infection                  | 0/1              | PCR-confirmed SARS-CoV-2 infection.                                                                       | The date of specimen collection that was found to be positive in a PCR test. |
| <b>Eligibility &amp; Adjustment</b>              |                  |                                                                                                           |                                                                              |
| Age                                              | Integer          | Age in complete years                                                                                     | Current                                                                      |
| Sex                                              | Male/Female      | As defined in CHS files                                                                                   | Current                                                                      |
| Long-term care facility resident                 | 0/1              | Is patient a long-term care facility resident per CHS files                                               | Current                                                                      |
| Confined to Home                                 | 0/1              | Is patient confined to his home per CHS files                                                             | Current                                                                      |
| Health-care worker                               | 0/1              | Is patient a health-care worker per CHS files                                                             | Current                                                                      |
| Continuous Membership in the Health Organization | 0/1              | Was patient a member of CHS for a full year before the index date                                         | Last Year                                                                    |
| Interaction with the Healthcare System           | 0/1              | Has the patient had a community health encounter or hospitalization in the 7 days prior to the index date | Last 7 days                                                                  |
| Place of Residence                               | List of places   | Geo-statistical area in which the patient resides per CHS files                                           | Current                                                                      |
| Socioeconomic Status                             | 0-6              | Patient socioeconomic status, based on home address                                                       | Current                                                                      |
| Population Sector                                | General Jewish / | As defined in CHS files                                                                                   | Current                                                                      |

|                        |                                    |                                                                                                                                                                                                                                                                                                                                                                                                                                                                                                                                                                                                                                                                                                                                                                                                                                                                                                                                        |              |
|------------------------|------------------------------------|----------------------------------------------------------------------------------------------------------------------------------------------------------------------------------------------------------------------------------------------------------------------------------------------------------------------------------------------------------------------------------------------------------------------------------------------------------------------------------------------------------------------------------------------------------------------------------------------------------------------------------------------------------------------------------------------------------------------------------------------------------------------------------------------------------------------------------------------------------------------------------------------------------------------------------------|--------------|
|                        | Arab /<br>Ultraorthod<br>ox Jewish |                                                                                                                                                                                                                                                                                                                                                                                                                                                                                                                                                                                                                                                                                                                                                                                                                                                                                                                                        |              |
| Pregnancy              | 0/1                                | As defined in CHS files                                                                                                                                                                                                                                                                                                                                                                                                                                                                                                                                                                                                                                                                                                                                                                                                                                                                                                                | Current      |
| Influenza vaccinations | 0/1                                | Did patient receive an<br>influenza vaccination in<br>the last 5 years                                                                                                                                                                                                                                                                                                                                                                                                                                                                                                                                                                                                                                                                                                                                                                                                                                                                 | Last 5 Years |
| Cancer                 | 0/1                                | ICD9 Code 174*<br>ICD9 Code 175*<br>ICD9 Code 233.0<br>ICD9 Code V10.3<br>ICD9 Proc Code 85.4*<br>ICD9 Code 153*<br>ICD9 Code 154*<br>ICD9 Code V10.5*<br>ICD9 Code V10.6*<br>ICD9 Code 185<br>ICD9 Code V10.46<br>ICD9 Code 162*<br>ICD9 Code V10.1*<br>ICD9 Code 188*<br>ICD9 Code V10.51<br>ICD9 Code 183*<br>ICD9 Code V10.43<br>ICD9 Code 179<br>ICD9 Code 182*<br>ICD9 Code V10.42<br>ICD9 Code 157*<br>ICD9 Code 191*<br>ICD9 Code 192*<br>ICD9 Code V10.85<br>ICD9 Code 151*<br>ICD9 Code V10.04<br>ICD9 Code 172*<br>ICD9 Code V10.82<br>ICD9 Code 201*<br>ICD9 Code 200*<br>ICD9 Code 202.4*<br>ICD9 Code 204*<br>ICD9 Code 205*<br>ICD9 Code 206*<br>ICD9 Code 207.1*<br>ICD9 Code 208.1*<br>ICD9 Code 189*<br>ICD9 Code V10.52<br>ICD9 Code 160*<br>ICD9 Code 161*<br>ICD9 Code 164.0<br>ICD9 Code 195.0<br>ICD9 Code V10.21<br>ICD9 Code V10.22<br>ICD9 Code 180*<br>ICD9 Code V10.41<br>ICD9 Code 140*<br>ICD9 Code 141* | Last 5 years |

|                                       |     |                                                                                                                                                                                                                                                                                                                                                                                                                                                                                                                                                                                                                                            |      |
|---------------------------------------|-----|--------------------------------------------------------------------------------------------------------------------------------------------------------------------------------------------------------------------------------------------------------------------------------------------------------------------------------------------------------------------------------------------------------------------------------------------------------------------------------------------------------------------------------------------------------------------------------------------------------------------------------------------|------|
|                                       |     | ICD9 Code 142*<br>ICD9 Code 143*<br>ICD9 Code 144*<br>ICD9 Code 145*<br>ICD9 Code 150*<br>ICD9 Code V10.03<br>ICD9 Code 155*<br>ICD9 Code 156*<br>ICD9 Code V10.07<br>ICD9 Code 170*<br>ICD9 Code V10.81<br>ICD9 Code 193<br>ICD9 Code V10.87<br>ICD9 Code 171*<br>ICD9 Code 176*<br>ICD9 Code 184*<br>ICD9 Code 186*<br>ICD9 Code 187*<br>ICD9 Code V10.4*<br>ICD9 Code 203*<br>ICD9 Code 273.3<br>ICD9 Code 152*<br>ICD9 Code 158*<br>ICD9 Code 159*<br>ICD9 Code 163*<br>ICD9 Code 164*<br>ICD9 Code 165*<br>ICD9 Code 181<br>ICD9 Code 190*<br>ICD9 Code 192.8<br>ICD9 Code 196*<br>ICD9 Code 197*<br>ICD9 Code 198*<br>ICD9 Code 199* |      |
| Chronic Kidney Disease                | 0/1 | ICD Proc Code 39.95<br>ICD Proc Code 54.98<br>ICD9 Code 996.81<br>ICD9 Code V42.0<br>ICD Proc Code 55.6*<br>ICD9 Code 403._1<br>ICD9 Code 404._2<br>ICD9 Code 404._3<br>ICD9 Code 585*<br>ICD9 Code 586<br>ICD9 Code 250.4*<br>ICD9 Code 274.1*<br>ICD9 Code 440.1<br>ICD9 Code 581*<br>ICD9 Code 582*<br>ICD9 Code 583*<br>ICD9 Code 587<br>ICD9 Code 588*<br>ICD9 Code 589*                                                                                                                                                                                                                                                              | Ever |
| Chronic Obstructive Pulmonary Disease | 0/1 | ICD9 Code 491*<br>ICD9 Code 492*                                                                                                                                                                                                                                                                                                                                                                                                                                                                                                                                                                                                           | Ever |

|                                  |     |                                                                                                                                                                                                                                                                                                                                                                            |                                                                               |
|----------------------------------|-----|----------------------------------------------------------------------------------------------------------------------------------------------------------------------------------------------------------------------------------------------------------------------------------------------------------------------------------------------------------------------------|-------------------------------------------------------------------------------|
|                                  |     | ICD9 Code 496                                                                                                                                                                                                                                                                                                                                                              |                                                                               |
| Heart Conditions                 | 0/1 | ICD9 Code 410*<br>ICD9 Code 411*<br>ICD9 Code 412<br>ICD9 Code 413*<br>ICD9 Code 414*<br>ICD9 Code 429.2, 429.7*<br>ICD9 Code V45.81,<br>V45.82<br>ICD9 Proc Code 36.0*<br>ICD9 Proc Code 36.1*<br>ICD9 Code 428*<br>ICD9 Code 398.91<br>ICD9 Code 402._1<br>ICD9 Code 404._1, ICD9<br>Code 404._3<br>ICD9 Code 416.9<br>ICD9 Code 514<br>ICD9 Code 425*<br>ICD9 Code 416* | Ever                                                                          |
| Solid Organ Transplant Recipient | 0/1 | ICD9 Code 996.81<br>ICD9 Code V42.0<br>ICD Proc Code 55.6*<br>ICD9 Code V42.7<br>ICD Proc Code 50.5*<br>ICD9 Code V42.1<br>ICD9 Code V43.2<br>ICD Proc Code 37.5<br>ICD9 Code V42.83<br>ICD Proc Code 52.8*<br>ICD9 Code V42.6<br>ICD Proc Code 33.5*<br>ICD Proc Code 33.6                                                                                                | Ever                                                                          |
| Obesity                          | 0/1 | Body Mass Index (BMI)<br>30-40                                                                                                                                                                                                                                                                                                                                             | Latest measurement in last 5 years not taken during pregnancy                 |
| Severe Obesity                   | 0/1 | Body Mass Index (BMI)<br>40+                                                                                                                                                                                                                                                                                                                                               | Latest measurement in last 5 years not taken during pregnancy                 |
| Pregnancy                        | 0/1 | Internal Clalit Registry                                                                                                                                                                                                                                                                                                                                                   | Current                                                                       |
| Sickle Cell Disease              | 0/1 | ICD9 Code 282.6*                                                                                                                                                                                                                                                                                                                                                           | Ever                                                                          |
| Smoking                          | 0/1 | Internal Clalit Registry                                                                                                                                                                                                                                                                                                                                                   | Last recorded value                                                           |
| Type 2 Diabetes Mellitus         | 0/1 | HbA1C > 6.5<br>ATC Codes A10[A,B]<br>ICD9 Code 250*<br>ICD9 Code 357.2<br>ICD9 Code 362.0*<br><br><b>And not:</b><br>ICD9 Code 250._1,                                                                                                                                                                                                                                     | For diagnosis codes, Ever<br>For drugs, 4 or more dispensed in last 12 months |

|                           |     |                                                                                                                                                                                                                                                                                                                                                                              |                                                                               |
|---------------------------|-----|------------------------------------------------------------------------------------------------------------------------------------------------------------------------------------------------------------------------------------------------------------------------------------------------------------------------------------------------------------------------------|-------------------------------------------------------------------------------|
|                           |     | 250..3                                                                                                                                                                                                                                                                                                                                                                       |                                                                               |
| Asthma                    | 0/1 | ICD9 Code 493*                                                                                                                                                                                                                                                                                                                                                               | Ever                                                                          |
| Cerebrovascular Disease   | 0/1 | ICD9 Code 362.34<br>ICD9 Code 430<br>ICD9 Code 431<br>ICD9 Code 432*<br>ICD9 Code 433*<br>ICD9 Code 434*<br>ICD9 Code 435*<br>ICD9 Code 436*<br>ICD9 Code 438*                                                                                                                                                                                                               | Ever                                                                          |
| Other Respiratory Disease | 0/1 | ICD9 Code 277.0*<br>ICD9 Code 494*<br>ICD9 Code 515                                                                                                                                                                                                                                                                                                                          | Ever                                                                          |
| Hypertension              | 0/1 | ICD9 Code 401*<br>ICD9 Code 402*<br>ICD9 Code 403*<br>ICD9 Code 404*<br>ICD9 Code 405*                                                                                                                                                                                                                                                                                       | Ever                                                                          |
| Immunocompromised State   | 0/1 | <b>Any of:</b><br>ICD9 Code 042*<br>ICD9 Code 043*<br>ICD9 Code 044*<br>ICD9 Code 795.71<br>ICD9 Code V08<br>ICD9 Code V42.8*<br>ICD9 Proc Code 41.0*<br><br><b>Or at least 2 of:</b><br>ATC4 Code H02AB<br>ATC4 Code H02BX<br>ATC4 Code M01BA<br><br><b>Or at least 2 of:</b><br>ATC2 Code L04                                                                              | For diagnosis codes, Ever<br>For drugs, 4 or more dispensed in last 12 months |
| Neurologic Conditions     | 0/1 | ICD9 Code 290.*<br>ICD9 Code 294*<br>ICD9 Code 310.1<br>ICD9 Code 331*<br>ATC Codes N06DA02,<br>N06DA03<br>ICD9 Code 358*<br>ICD9 Code 332.[0,1]<br>ICD9 Code 345*<br>ICD9 Code 340<br>ATC Codes L03AB07,<br>L03AB08, L04AA07<br>ICD9 Code 343*<br>ICD9 Code 333.4<br>ICD9 Code 334*<br>ICD9 Code 356*<br>ICD9 Code 138<br>ICD9 Code 335*<br>ICD9 Code 730.7*<br>ICD9 V12.02 | For diagnosis codes, Ever<br>For drugs, 4 or more dispensed in last 12 months |

|                                                                         |         |                                                                                                                                                                                                                                                                                                                                                                         |                                                               |
|-------------------------------------------------------------------------|---------|-------------------------------------------------------------------------------------------------------------------------------------------------------------------------------------------------------------------------------------------------------------------------------------------------------------------------------------------------------------------------|---------------------------------------------------------------|
|                                                                         |         | ICD9 Code 228.02<br>ICD9 Code 307.23<br>ICD9 Code 330.9<br>ICD9 Code 331.3*<br>ICD9 Code 331.4<br>ICD9 Code 333*<br>ICD9 Code 334*<br>ICD9 Code 336*<br>ICD9 Code 337<br>ICD9 Code 335.1*<br>ICD9 Code 359.0<br>ICD9 Code 359.21<br>ICD9 Code 357.0<br>ICD9 Code 237.7*<br>ICD9 Code 742.8[1,2]                                                                         |                                                               |
| Liver Disease                                                           | 0/1     | ICD9 Code 070.22<br>ICD9 Code 070.23<br>ICD9 Code 070.32<br>ICD9 Code 070.33<br>ICD9 Code 070.44<br>ICD9 Code 070.54<br>ICD9 Code V02.61<br>ICD9 Code V02.62<br>ICD9 Code 571*<br>ICD9 Code 275.1<br>ICD9 Code 277.4<br>ICD9 Code 452<br>ICD9 Code 453.0<br>ICD9 Code 571.8<br>ICD9 Code 571.9<br>ICD9 Code 572*                                                        | Ever                                                          |
| Overweight                                                              | 0/1     | Body Mass Index (BMI)<br>25-30                                                                                                                                                                                                                                                                                                                                          | Latest measurement in last 5 years not taken during pregnancy |
| Thalassemia                                                             | 0/1     | ICD9 Code 282.4*                                                                                                                                                                                                                                                                                                                                                        | Ever                                                          |
| Type 1 Diabetes Mellitus                                                | 0/1     | ICD9 Code 250._1,<br>250._3                                                                                                                                                                                                                                                                                                                                             | Ever                                                          |
| Count of pre-existing conditions considered by the CDC as risk criteria | Integer | Summation of 1 point for each of the following: <ul style="list-style-type: none"> <li>• Cancer</li> <li>• CKD</li> <li>• Heart Disease</li> <li>• Sickle Cell Disease</li> <li>• Asthma</li> <li>• Cerebrovascular Disease</li> <li>• Hypertension</li> <li>• Neurological Disease</li> <li>• Liver Disease</li> <li>• Thalassemia</li> <li>• COPD or other</li> </ul> | Based on the variables above                                  |



|  |  |                                                                                                                                                                                                            |  |
|--|--|------------------------------------------------------------------------------------------------------------------------------------------------------------------------------------------------------------|--|
|  |  | respiratory disease <ul style="list-style-type: none"> <li>• Type 1 or 2 Diabetes Mellitus</li> <li>• Solid organ transplant recipient or immunodeficiency</li> <li>• Obesity or severe obesity</li> </ul> |  |
|--|--|------------------------------------------------------------------------------------------------------------------------------------------------------------------------------------------------------------|--|

<sup>1</sup>Additional confirmation of the diagnostic codes was done by checking the matching of the free text within the diagnosis description field.

<sup>2</sup>Covariates were extracted at the beginning of the calendar month in which the index date occurred.

## Table S2 – Definition of outcomes

Names, groups, potential values, definitions and time periods for all variables used in the study to define outcomes. Variables were defined using ICD9 codes. ICD: International Classification of Disease; CVA: Cerebrovascular Accident.

| Variable                 | Values | Definitions <sup>1</sup>                                                                                                                  | Timing               |
|--------------------------|--------|-------------------------------------------------------------------------------------------------------------------------------------------|----------------------|
| Acute Kidney Injury      | 0/1    | ICD9 Code 584.[5-9]*                                                                                                                      | After the index date |
| Anemia                   | 0/1    | ICD9 Code 28[0,1,3,4,5]*                                                                                                                  | After the index date |
| Appendicitis             | 0/1    | ICD9 Code 54[0-2]*<br>ICD9 Procedure Code 47*                                                                                             | After the index date |
| Arrhythmia               | 0/1    | ICD9 Code 426*<br>ICD9 Code 427*                                                                                                          | After the index date |
| Arthritis or Arthropathy | 0/1    | ICD9 Code 713*<br>ICD9 Code 714.9*<br>ICD9 Code 716.[4-9]*<br>ICD9 Code 718.9<br>ICD9 Code 719.[0,1,6,8,9]*                               | After the index date |
| Bell's Palsy             | 0/1    | ICD9 Code 351.0*                                                                                                                          | After the index date |
| Cerebrovascular Accident | 0/1    | ICD9 Code 433<br>ICD9 Code 433.[0,1,2,3,8,9]<br>ICD9 Code 433. [0,1,2,3,8,9]1<br>ICD9 Code 434*<br>ICD9 Code 362.3[1-3]<br>ICD9 Code 436* | After the index date |
| Deep Vein Thrombosis     | 0/1    | ICD9 Code 451<br>ICD9 Code 451.[1-9]*<br>ICD9 Code 453.[1,4]*<br>ICD9 Code<br>453.8[0,2,3,4,5,6,7,8,9]<br>ICD9 Code 671.[3,4]*            | After the index date |
| Herpes Simplex           | 0/1    | ICD9 Code 054*                                                                                                                            | After the index date |
| Herpes Zoster            | 0/1    | ICD9 Code 053*                                                                                                                            | After the index date |
| Intracranial hemorrhage  | 0/1    | ICD9 Code 43[0,1,2]*                                                                                                                      | After the index date |
| Lymphadenopathy          | 0/1    | ICD9 Code 785.6*<br>ICD9 Code 683*<br>ICD9 Code 289.[2,3]*                                                                                | After the index date |
| Lymphopenia              | 0/1    | ICD9 Code 288.5*                                                                                                                          | After the index date |
| Myocardial Infarction    | 0/1    | ICD9 Code 410*                                                                                                                            | After the index date |
| Myocarditis              | 0/1    | ICD9 Code 422*<br>ICD9 Code 429.0*<br>ICD9 Code 398.0*<br>ICD9 Code 391.2*                                                                | After the index date |

|                   |     |                                                                                                                                                                                                                                        |                      |
|-------------------|-----|----------------------------------------------------------------------------------------------------------------------------------------------------------------------------------------------------------------------------------------|----------------------|
| Neutropenia       | 0/1 | ICD9 Code 288.0<br>ICD9 Code 288.0[0,3,4,9]                                                                                                                                                                                            | After the index date |
| Other Thrombosis  | 0/1 | ICD9 Code 444*<br>ICD9 Code 557.[0,9]*<br>ICD9 Code 557<br>ICD9 Code 452*<br>ICD9 Code 453<br>ICD9 Code 453.[0,1,2,3,4,9]*<br>ICD9 Code 453.[7,8]<br>ICD9 Code 453.[7,8][2-9]<br>ICD9 Code 437.6*                                      | After the index date |
| Paresthesia       | 0/1 | ICD9 Code 782.0*                                                                                                                                                                                                                       | After the index date |
| Pericarditis      | 0/1 | ICD9 Code 420*                                                                                                                                                                                                                         | After the index date |
| Pulmonary Embolus | 0/1 | ICD9 Code 415.1*<br>ICD9 Code 673.[2,8]*                                                                                                                                                                                               | After the index date |
| Seizures          | 0/1 | ICD9 Code 345.[2,3]*<br>ICD9 Code 780.3<br>ICD9 Code 780.39                                                                                                                                                                            | After the index date |
| Syncope           | 0/1 | ICD9 Code 780.2*<br>ICD9 Code 992.1*                                                                                                                                                                                                   | After the index date |
| Thrombocytopenia  | 0/1 | ICD9 Code 287.2*<br>ICD9 Code 287.3<br>ICD9 Code 287.3[0,1,3,9]<br>ICD9 Code 287.5                                                                                                                                                     | After the index date |
| Uveitis           | 0/1 | ICD9 Code 360.12<br>ICD9 Code 362.18<br>ICD9 Code 363.0*<br>ICD9 Code 363.2[0,1,2]<br>ICD9 Code 363.1*<br>ICD9 Code 364.[0,1,2,3]*<br>ICD9 Code 053.22<br>ICD9 Code 054.44<br>ICD9 Code 091.5*<br>ICD9 Code 098.41<br>ICD9 Code 115.92 | After the index date |
| Vertigo           | 0/1 | ICD9 Code 780.4*                                                                                                                                                                                                                       | After the index date |

<sup>1</sup>Additional confirmation of the diagnostic codes was done by checking the matching of the free text within the diagnosis description field.

\*Any of the possible ICD9 combinations with a match

Table S3 – Population characteristics of the eligible cohorts of vaccinated and infected individuals

Characteristics of the different study populations following application of all eligibility criteria. CDC: Centers for Disease Control and Prevention; BMI: Body mass index.

| Variable                              | Vaccination<br>N = 1,736,832 | SARS-CoV2 Infection<br>N = 233,392 |
|---------------------------------------|------------------------------|------------------------------------|
| Basic Demographics                    |                              |                                    |
| Age                                   | 43 (30, 60)                  | 36 (25, 51)                        |
| Age Groups                            |                              |                                    |
| 16-39                                 | 767703 (44%)                 | 133052 (57%)                       |
| 40-49                                 | 302438 (17%)                 | 38944 (17%)                        |
| 50-59                                 | 214697 (12%)                 | 26958 (12%)                        |
| 60-69                                 | 221997 (13%)                 | 19453 (8.3%)                       |
| 70-79                                 | 150789 (8.7%)                | 9902 (4.2%)                        |
| 80+                                   | 79208 (4.6%)                 | 5083 (2.2%)                        |
| Sex                                   |                              |                                    |
| Female                                | 851276 (49%)                 | 126786 (54%)                       |
| Male                                  | 885556 (51%)                 | 106606 (46%)                       |
| Population Sector                     |                              |                                    |
| General Jewish                        | 1246896 (72%)                | 125272 (54%)                       |
| Ultra-Orthodox Jewish                 | 57730 (3.3%)                 | 30288 (13%)                        |
| Arab                                  | 432206 (25%)                 | 77832 (33%)                        |
| CDC Risk Factor Count                 |                              |                                    |
| 0                                     | 939380 (54%)                 | 130912 (56%)                       |
| 1                                     | 426563 (25%)                 | 58317 (25%)                        |
| 2                                     | 184817 (11%)                 | 21909 (9.4%)                       |
| 3                                     | 99431 (5.7%)                 | 10893 (4.7%)                       |
| 4+                                    | 86641 (5.0%)                 | 11361 (4.9%)                       |
| Flu Vaccinations in the Last 5 Years  |                              |                                    |
| 0                                     | 985550 (57%)                 | 153367 (66%)                       |
| 1-2                                   | 351235 (20%)                 | 42594 (18%)                        |
| 3-4                                   | 183381 (11%)                 | 19949 (8.5%)                       |
| 5+                                    | 216666 (12%)                 | 17482 (7.5%)                       |
| CDC “Certain” Risk Criteria           |                              |                                    |
| Cancer                                | 29900 (1.7%)                 | 3690 (1.6%)                        |
| Chronic Kidney Disease                | 121728 (7.0%)                | 15419 (6.6%)                       |
| Chronic Obstructive Pulmonary Disease | 33397 (1.9%)                 | 3403 (1.5%)                        |
| Heart Disease                         | 108620 (6.3%)                | 11227 (4.8%)                       |
| Solid Organ Transplant                | 1534 (<0.1%)                 | 379 (0.2%)                         |
| Obesity (BMI 30-40)                   | 326577 (19%)                 | 49174 (21%)                        |
| Severe Obesity (BMI 40+)              | 31162 (1.8%)                 | 5790 (2.5%)                        |
| Pregnancy                             | 18787 (1.1%)                 | 8666 (3.7%)                        |
| Sickle Cell Disease                   | 520 (<0.1%)                  | 101 (<0.1%)                        |
| Smoking                               | 312452 (18%)                 | 25082 (11%)                        |

|                              | Vaccination   | SARS-CoV2 Infection |
|------------------------------|---------------|---------------------|
| Variable                     | N = 1,736,832 | N = 233,392         |
| Type 2 Diabetes Mellitus     | 189560 (11%)  | 22582 (9.7%)        |
| CDC "Possible" Risk Criteria |               |                     |
| Asthma                       | 118368 (6.8%) | 16636 (7.1%)        |
| Cerebrovascular Disease      | 51799 (3.0%)  | 5571 (2.4%)         |
| Other Respiratory Disease    | 5888 (0.3%)   | 662 (0.3%)          |
| Hypertension                 | 294689 (17%)  | 28997 (12%)         |
| Immunosuppression            | 45685 (2.6%)  | 7608 (3.3%)         |
| Neurological Disease         | 81703 (4.7%)  | 9672 (4.1%)         |
| Liver Disease                | 31513 (1.8%)  | 4370 (1.9%)         |
| Overweight (BMI 25-30)       | 564363 (32%)  | 71210 (31%)         |
| Thalassemia                  | 14448 (0.8%)  | 2705 (1.2%)         |
| Type 1 Diabetes Mellitus     | 8040 (0.5%)   | 1272 (0.5%)         |

## Table S4 – Outcome specific population tables for the vaccination exposure analyses

Characteristics of the different study populations for each study outcome following application of all eligibility criteria, the matching process and exclusion of patients with the outcome diagnosed before start of follow-up. CDC: Centers for Disease Control and Prevention; BMI: Body mass index.

| Vaccination - Acute Kidney Injury     | 1, N = 912019 | 0, N = 912019 |
|---------------------------------------|---------------|---------------|
| Age                                   | 38 (27, 52)   | 38 (27, 52)   |
| Age Groups                            |               |               |
| 16-39                                 | 489056 (54%)  | 489056 (54%)  |
| 40-49                                 | 167811 (18%)  | 167811 (18%)  |
| 50-59                                 | 97958 (11%)   | 97958 (11%)   |
| 60-69                                 | 90159 (9.9%)  | 90159 (9.9%)  |
| 70-79                                 | 50375 (5.5%)  | 50375 (5.5%)  |
| 80+                                   | 16660 (1.8%)  | 16660 (1.8%)  |
| Sex                                   |               |               |
| F                                     | 445045 (49%)  | 445045 (49%)  |
| M                                     | 466974 (51%)  | 466974 (51%)  |
| Population Sector                     |               |               |
| General Jewish                        | 612541 (67%)  | 612541 (67%)  |
| Arab                                  | 274343 (30%)  | 274343 (30%)  |
| Ultra-Orthodox Jewish                 | 25135 (2.8%)  | 25135 (2.8%)  |
| CDC Risk Factor Count                 |               |               |
| 0                                     | 593338 (65%)  | 593338 (65%)  |
| 1                                     | 210663 (23%)  | 210663 (23%)  |
| 2                                     | 64125 (7.0%)  | 64125 (7.0%)  |
| 3                                     | 26319 (2.9%)  | 26319 (2.9%)  |
| 4+                                    | 17574 (1.9%)  | 17574 (1.9%)  |
| Flu Vaccinations in the Last 5 Years  |               |               |
| 0                                     | 584755 (64%)  | 651552 (71%)  |
| 1-2                                   | 177887 (20%)  | 151836 (17%)  |
| 3-4                                   | 75013 (8.2%)  | 60389 (6.6%)  |
| 5+                                    | 74364 (8.2%)  | 48242 (5.3%)  |
| Cancer                                | 9589 (1.1%)   | 9927 (1.1%)   |
| CDC "Certain" Risk Criteria           |               |               |
| Chronic Kidney Disease                | 31760 (3.5%)  | 32082 (3.5%)  |
| Chronic Obstructive Pulmonary Disease | 9423 (1.0%)   | 10756 (1.2%)  |
| Heart Disease                         | 28575 (3.1%)  | 28182 (3.1%)  |
| Solid Organ Transplant                | 79 (<0.1%)    | 91 (<0.1%)    |
| Obesity (BMI 30-40)                   | 132186 (14%)  | 128100 (14%)  |
| Severe Obesity (BMI 40+)              | 12223 (1.3%)  | 12912 (1.4%)  |
| Pregnancy                             | 6477 (0.7%)   | 6477 (0.7%)   |
| Sickle Cell Disease                   | 147 (<0.1%)   | 193 (<0.1%)   |
| Smoking                               | 163030 (18%)  | 193831 (21%)  |
| Type 2 Diabetes Mellitus              | 58758 (6.4%)  | 58121 (6.4%)  |
| Asthma                                | 48380 (5.3%)  | 48697 (5.3%)  |
| CDC "Possible" Risk Criteria          |               |               |
| Cerebrovascular Disease               | 13385 (1.5%)  | 13952 (1.5%)  |
| Other Respiratory Disease             | 1870 (0.2%)   | 1917 (0.2%)   |
| Hypertension                          | 89760 (9.8%)  | 88379 (9.7%)  |
| Immunosuppression                     | 15486 (1.7%)  | 15404 (1.7%)  |
| Neurological Disease                  | 26588 (2.9%)  | 28726 (3.1%)  |
| Liver Disease                         | 10390 (1.1%)  | 12474 (1.4%)  |
| Overweight (BMI 25-30)                | 292720 (32%)  | 278854 (31%)  |
| Thalassemia                           | 6248 (0.7%)   | 6032 (0.7%)   |
| Type 1 Diabetes Mellitus              | 2635 (0.3%)   | 2458 (0.3%)   |

| Vaccination - Anemia                  | 1, N = 709267 | 0, N = 709267 |
|---------------------------------------|---------------|---------------|
| Age                                   | 38 (28, 52)   | 38 (28, 52)   |
| Age Groups                            |               |               |
| 16-39                                 | 378506 (53%)  | 378506 (53%)  |
| 40-49                                 | 132121 (19%)  | 132121 (19%)  |
| 50-59                                 | 74741 (11%)   | 74741 (11%)   |
| 60-69                                 | 71191 (10%)   | 71191 (10%)   |
| 70-79                                 | 40872 (5.8%)  | 40872 (5.8%)  |
| 80+                                   | 11836 (1.7%)  | 11836 (1.7%)  |
| Sex                                   |               |               |
| F                                     | 290815 (41%)  | 290815 (41%)  |
| M                                     | 418452 (59%)  | 418452 (59%)  |
| Population Sector                     |               |               |
| General Jewish                        | 482555 (68%)  | 482555 (68%)  |
| Arab                                  | 207738 (29%)  | 207738 (29%)  |
| Ultra-Orthodox Jewish                 | 18974 (2.7%)  | 18974 (2.7%)  |
| CDC Risk Factor Count                 |               |               |
| 0                                     | 473463 (67%)  | 473463 (67%)  |
| 1                                     | 157270 (22%)  | 157270 (22%)  |
| 2                                     | 46725 (6.6%)  | 46725 (6.6%)  |
| 3                                     | 18985 (2.7%)  | 18985 (2.7%)  |
| 4+                                    | 12824 (1.8%)  | 12824 (1.8%)  |
| Flu Vaccinations in the Last 5 Years  |               |               |
| 0                                     | 464459 (65%)  | 516885 (73%)  |
| 1-2                                   | 133834 (19%)  | 112551 (16%)  |
| 3-4                                   | 55861 (7.9%)  | 44351 (6.3%)  |
| 5+                                    | 55113 (7.8%)  | 35480 (5.0%)  |
| Cancer                                | 6332 (0.9%)   | 6536 (0.9%)   |
| CDC "Certain" Risk Criteria           |               |               |
| Chronic Kidney Disease                | 27391 (3.9%)  | 27573 (3.9%)  |
| Chronic Obstructive Pulmonary Disease | 7152 (1.0%)   | 8077 (1.1%)   |
| Heart Disease                         | 21719 (3.1%)  | 21309 (3.0%)  |
| Solid Organ Transplant                | 121 (<0.1%)   | 118 (<0.1%)   |
| Obesity (BMI 30-40)                   | 98289 (14%)   | 95285 (13%)   |
| Severe Obesity (BMI 40+)              | 8181 (1.2%)   | 8708 (1.2%)   |
| Pregnancy                             | 3610 (0.5%)   | 3610 (0.5%)   |
| Sickle Cell Disease                   | 47 (<0.1%)    | 54 (<0.1%)    |
| Smoking                               | 140625 (20%)  | 167657 (24%)  |
| Type 2 Diabetes Mellitus              | 42859 (6.0%)  | 42679 (6.0%)  |
| Asthma                                | 34636 (4.9%)  | 34816 (4.9%)  |
| CDC "Possible" Risk Criteria          |               |               |
| Cerebrovascular Disease               | 9567 (1.3%)   | 10131 (1.4%)  |
| Other Respiratory Disease             | 1233 (0.2%)   | 1255 (0.2%)   |
| Hypertension                          | 68501 (9.7%)  | 67274 (9.5%)  |
| Immunosuppression                     | 10013 (1.4%)  | 9985 (1.4%)   |
| Neurological Disease                  | 18763 (2.6%)  | 20242 (2.9%)  |
| Liver Disease                         | 7370 (1.0%)   | 9044 (1.3%)   |
| Overweight (BMI 25-30)                | 236087 (33%)  | 224147 (32%)  |
| Thalassemia                           | 1708 (0.2%)   | 1600 (0.2%)   |
| Type 1 Diabetes Mellitus              | 1859 (0.3%)   | 1719 (0.2%)   |

| Vaccination - Appendicitis            | 1, N = 900289 | 0, N = 900289 |
|---------------------------------------|---------------|---------------|
| Age                                   | 39 (27, 54)   | 39 (27, 54)   |
| Age Groups                            |               |               |
| 16-39                                 | 468768 (52%)  | 468768 (52%)  |
| 40-49                                 | 161965 (18%)  | 161965 (18%)  |
| 50-59                                 | 96480 (11%)   | 96480 (11%)   |
| 60-69                                 | 92819 (10%)   | 92819 (10%)   |
| 70-79                                 | 57000 (6.3%)  | 57000 (6.3%)  |
| 80+                                   | 23257 (2.6%)  | 23257 (2.6%)  |
| Sex                                   |               |               |
| F                                     | 436944 (49%)  | 436944 (49%)  |
| M                                     | 463345 (51%)  | 463345 (51%)  |
| Population Sector                     |               |               |
| General Jewish                        | 610280 (68%)  | 610280 (68%)  |
| Arab                                  | 265277 (29%)  | 265277 (29%)  |
| Ultra-Orthodox Jewish                 | 24732 (2.7%)  | 24732 (2.7%)  |
| CDC Risk Factor Count                 |               |               |
| 0                                     | 571838 (64%)  | 571838 (64%)  |
| 1                                     | 204403 (23%)  | 204403 (23%)  |
| 2                                     | 65806 (7.3%)  | 65806 (7.3%)  |
| 3                                     | 30228 (3.4%)  | 30228 (3.4%)  |
| 4+                                    | 28014 (3.1%)  | 28014 (3.1%)  |
| Flu Vaccinations in the Last 5 Years  |               |               |
| 0                                     | 563756 (63%)  | 629093 (70%)  |
| 1-2                                   | 174874 (19%)  | 150955 (17%)  |
| 3-4                                   | 77698 (8.6%)  | 64324 (7.1%)  |
| 5+                                    | 83961 (9.3%)  | 55917 (6.2%)  |
| Cancer                                | 10922 (1.2%)  | 11268 (1.3%)  |
| CDC "Certain" Risk Criteria           |               |               |
| Chronic Kidney Disease                | 43273 (4.8%)  | 43750 (4.9%)  |
| Chronic Obstructive Pulmonary Disease | 11330 (1.3%)  | 12947 (1.4%)  |
| Heart Disease                         | 37082 (4.1%)  | 36727 (4.1%)  |
| Solid Organ Transplant                | 430 (<0.1%)   | 441 (<0.1%)   |
| Obesity (BMI 30-40)                   | 134667 (15%)  | 130431 (14%)  |
| Severe Obesity (BMI 40+)              | 12487 (1.4%)  | 13224 (1.5%)  |
| Pregnancy                             | 6150 (0.7%)   | 6150 (0.7%)   |
| Sickle Cell Disease                   | 139 (<0.1%)   | 186 (<0.1%)   |
| Smoking                               | 158648 (18%)  | 188654 (21%)  |
| Type 2 Diabetes Mellitus              | 68226 (7.6%)  | 67359 (7.5%)  |
| Asthma                                | 48019 (5.3%)  | 48382 (5.4%)  |
| CDC "Possible" Risk Criteria          |               |               |
| Cerebrovascular Disease               | 17057 (1.9%)  | 17810 (2.0%)  |
| Other Respiratory Disease             | 2070 (0.2%)   | 2191 (0.2%)   |
| Hypertension                          | 104841 (12%)  | 103168 (11%)  |
| Immunosuppression                     | 16747 (1.9%)  | 16745 (1.9%)  |
| Neurological Disease                  | 29009 (3.2%)  | 31442 (3.5%)  |
| Liver Disease                         | 11222 (1.2%)  | 13413 (1.5%)  |
| Overweight (BMI 25-30)                | 290839 (32%)  | 276980 (31%)  |
| Thalassemia                           | 6109 (0.7%)   | 5850 (0.6%)   |
| Type 1 Diabetes Mellitus              | 2965 (0.3%)   | 2859 (0.3%)   |



| Vaccination - Arrhythmia              | 1, N = 856152 | 0, N = 856152 |
|---------------------------------------|---------------|---------------|
| Age                                   | 37 (27, 50)   | 37 (27, 50)   |
| Age Groups                            |               |               |
| 16-39                                 | 472763 (55%)  | 472763 (55%)  |
| 40-49                                 | 159852 (19%)  | 159852 (19%)  |
| 50-59                                 | 90905 (11%)   | 90905 (11%)   |
| 60-69                                 | 79822 (9.3%)  | 79822 (9.3%)  |
| 70-79                                 | 41101 (4.8%)  | 41101 (4.8%)  |
| 80+                                   | 11709 (1.4%)  | 11709 (1.4%)  |
| Sex                                   |               |               |
| F                                     | 411326 (48%)  | 411326 (48%)  |
| M                                     | 444826 (52%)  | 444826 (52%)  |
| Population Sector                     |               |               |
| General Jewish                        | 569433 (67%)  | 569433 (67%)  |
| Arab                                  | 262974 (31%)  | 262974 (31%)  |
| Ultra-Orthodox Jewish                 | 23745 (2.8%)  | 23745 (2.8%)  |
| CDC Risk Factor Count                 |               |               |
| 0                                     | 570214 (67%)  | 570214 (67%)  |
| 1                                     | 195900 (23%)  | 195900 (23%)  |
| 2                                     | 54924 (6.4%)  | 54924 (6.4%)  |
| 3                                     | 21065 (2.5%)  | 21065 (2.5%)  |
| 4+                                    | 14049 (1.6%)  | 14049 (1.6%)  |
| Flu Vaccinations in the Last 5 Years  |               |               |
| 0                                     | 562329 (66%)  | 625195 (73%)  |
| 1-2                                   | 165862 (19%)  | 139661 (16%)  |
| 3-4                                   | 66594 (7.8%)  | 52409 (6.1%)  |
| 5+                                    | 61367 (7.2%)  | 38887 (4.5%)  |
| Cancer                                | 8243 (1.0%)   | 8572 (1.0%)   |
| CDC "Certain" Risk Criteria           |               |               |
| Chronic Kidney Disease                | 32943 (3.8%)  | 33440 (3.9%)  |
| Chronic Obstructive Pulmonary Disease | 7638 (0.9%)   | 8589 (1.0%)   |
| Heart Disease                         | 19746 (2.3%)  | 19389 (2.3%)  |
| Solid Organ Transplant                | 263 (<0.1%)   | 280 (<0.1%)   |
| Obesity (BMI 30-40)                   | 119833 (14%)  | 116146 (14%)  |
| Severe Obesity (BMI 40+)              | 11046 (1.3%)  | 11574 (1.4%)  |
| Pregnancy                             | 6135 (0.7%)   | 6135 (0.7%)   |
| Sickle Cell Disease                   | 141 (<0.1%)   | 173 (<0.1%)   |
| Smoking                               | 154406 (18%)  | 183742 (21%)  |
| Type 2 Diabetes Mellitus              | 50542 (5.9%)  | 49989 (5.8%)  |
| Asthma                                | 44235 (5.2%)  | 44615 (5.2%)  |
| CDC "Possible" Risk Criteria          |               |               |
| Cerebrovascular Disease               | 10244 (1.2%)  | 10690 (1.2%)  |
| Other Respiratory Disease             | 1452 (0.2%)   | 1517 (0.2%)   |
| Hypertension                          | 73297 (8.6%)  | 72015 (8.4%)  |
| Immunosuppression                     | 13542 (1.6%)  | 13514 (1.6%)  |
| Neurological Disease                  | 22440 (2.6%)  | 24317 (2.8%)  |
| Liver Disease                         | 9125 (1.1%)   | 11024 (1.3%)  |
| Overweight (BMI 25-30)                | 273003 (32%)  | 259977 (30%)  |
| Thalassemia                           | 5779 (0.7%)   | 5533 (0.6%)   |
| Type 1 Diabetes Mellitus              | 2460 (0.3%)   | 2297 (0.3%)   |

| Vaccination - Arthritis or Arthropathy | 1, N = 731340 | 0, N = 731340 |
|----------------------------------------|---------------|---------------|
| Age                                    | 35 (25, 46)   | 35 (25, 46)   |
| Age Groups                             |               |               |
| 16-39                                  | 448546 (61%)  | 448546 (61%)  |
| 40-49                                  | 130306 (18%)  | 130306 (18%)  |
| 50-59                                  | 63981 (8.7%)  | 63981 (8.7%)  |
| 60-69                                  | 51771 (7.1%)  | 51771 (7.1%)  |
| 70-79                                  | 28249 (3.9%)  | 28249 (3.9%)  |
| 80+                                    | 8487 (1.2%)   | 8487 (1.2%)   |
| Sex                                    |               |               |
| F                                      | 346106 (47%)  | 346106 (47%)  |
| M                                      | 385234 (53%)  | 385234 (53%)  |
| Population Sector                      |               |               |
| General Jewish                         | 480327 (66%)  | 480327 (66%)  |
| Arab                                   | 229072 (31%)  | 229072 (31%)  |
| Ultra-Orthodox Jewish                  | 21941 (3.0%)  | 21941 (3.0%)  |
| CDC Risk Factor Count                  |               |               |
| 0                                      | 515882 (71%)  | 515882 (71%)  |
| 1                                      | 157915 (22%)  | 157915 (22%)  |
| 2                                      | 36266 (5.0%)  | 36266 (5.0%)  |
| 3                                      | 12581 (1.7%)  | 12581 (1.7%)  |
| 4+                                     | 8696 (1.2%)   | 8696 (1.2%)   |
| Flu Vaccinations in the Last 5 Years   |               |               |
| 0                                      | 500320 (68%)  | 554137 (76%)  |
| 1-2                                    | 138956 (19%)  | 113911 (16%)  |
| 3-4                                    | 49618 (6.8%)  | 37142 (5.1%)  |
| 5+                                     | 42446 (5.8%)  | 26150 (3.6%)  |
| Cancer                                 | 5949 (0.8%)   | 5959 (0.8%)   |
| CDC "Certain" Risk Criteria            |               |               |
| Chronic Kidney Disease                 | 23194 (3.2%)  | 23590 (3.2%)  |
| Chronic Obstructive Pulmonary Disease  | 4636 (0.6%)   | 5400 (0.7%)   |
| Heart Disease                          | 16262 (2.2%)  | 16106 (2.2%)  |
| Solid Organ Transplant                 | 182 (<0.1%)   | 198 (<0.1%)   |
| Obesity (BMI 30-40)                    | 88475 (12%)   | 85992 (12%)   |
| Severe Obesity (BMI 40+)               | 7752 (1.1%)   | 7934 (1.1%)   |
| Pregnancy                              | 5856 (0.8%)   | 5856 (0.8%)   |
| Sickle Cell Disease                    | 124 (<0.1%)   | 155 (<0.1%)   |
| Smoking                                | 125812 (17%)  | 151157 (21%)  |
| Type 2 Diabetes Mellitus               | 31758 (4.3%)  | 31362 (4.3%)  |
| Asthma                                 | 36988 (5.1%)  | 37045 (5.1%)  |
| CDC "Possible" Risk Criteria           |               |               |
| Cerebrovascular Disease                | 6874 (0.9%)   | 7341 (1.0%)   |
| Other Respiratory Disease              | 965 (0.1%)    | 973 (0.1%)    |
| Hypertension                           | 49305 (6.7%)  | 48552 (6.6%)  |
| Immunosuppression                      | 7360 (1.0%)   | 7322 (1.0%)   |
| Neurological Disease                   | 15157 (2.1%)  | 16549 (2.3%)  |
| Liver Disease                          | 6118 (0.8%)   | 7446 (1.0%)   |
| Overweight (BMI 25-30)                 | 225398 (31%)  | 214162 (29%)  |
| Thalassemia                            | 4834 (0.7%)   | 4692 (0.6%)   |
| Type 1 Diabetes Mellitus               | 1894 (0.3%)   | 1725 (0.2%)   |

| Vaccination - Bell's Palsy            | 1, N = 923692 | 0, N = 923692 |
|---------------------------------------|---------------|---------------|
| Age                                   | 38 (27, 53)   | 38 (27, 53)   |
| Age Groups                            |               |               |
| 16-39                                 | 485139 (53%)  | 485139 (53%)  |
| 40-49                                 | 166488 (18%)  | 166488 (18%)  |
| 50-59                                 | 97887 (11%)   | 97887 (11%)   |
| 60-69                                 | 93451 (10%)   | 93451 (10%)   |
| 70-79                                 | 57237 (6.2%)  | 57237 (6.2%)  |
| 80+                                   | 23490 (2.5%)  | 23490 (2.5%)  |
| Sex                                   |               |               |
| F                                     | 447068 (48%)  | 447068 (48%)  |
| M                                     | 476624 (52%)  | 476624 (52%)  |
| Population Sector                     |               |               |
| General Jewish                        | 625923 (68%)  | 625923 (68%)  |
| Arab                                  | 272537 (30%)  | 272537 (30%)  |
| Ultra-Orthodox Jewish                 | 25232 (2.7%)  | 25232 (2.7%)  |
| CDC Risk Factor Count                 |               |               |
| 0                                     | 588934 (64%)  | 588934 (64%)  |
| 1                                     | 209908 (23%)  | 209908 (23%)  |
| 2                                     | 66770 (7.2%)  | 66770 (7.2%)  |
| 3                                     | 30303 (3.3%)  | 30303 (3.3%)  |
| 4+                                    | 27777 (3.0%)  | 27777 (3.0%)  |
| Flu Vaccinations in the Last 5 Years  |               |               |
| 0                                     | 580442 (63%)  | 647411 (70%)  |
| 1-2                                   | 179318 (19%)  | 154587 (17%)  |
| 3-4                                   | 79098 (8.6%)  | 65248 (7.1%)  |
| 5+                                    | 84834 (9.2%)  | 56446 (6.1%)  |
| Cancer                                | 11145 (1.2%)  | 11510 (1.2%)  |
| CDC "Certain" Risk Criteria           |               |               |
| Chronic Kidney Disease                | 44291 (4.8%)  | 44854 (4.9%)  |
| Chronic Obstructive Pulmonary Disease | 11500 (1.2%)  | 13022 (1.4%)  |
| Heart Disease                         | 37316 (4.0%)  | 37083 (4.0%)  |
| Solid Organ Transplant                | 431 (<0.1%)   | 451 (<0.1%)   |
| Obesity (BMI 30-40)                   | 137159 (15%)  | 132873 (14%)  |
| Severe Obesity (BMI 40+)              | 12577 (1.4%)  | 13390 (1.4%)  |
| Pregnancy                             | 6396 (0.7%)   | 6396 (0.7%)   |
| Sickle Cell Disease                   | 150 (<0.1%)   | 192 (<0.1%)   |
| Smoking                               | 163850 (18%)  | 194728 (21%)  |
| Type 2 Diabetes Mellitus              | 68114 (7.4%)  | 67195 (7.3%)  |
| Asthma                                | 49650 (5.4%)  | 50082 (5.4%)  |
| CDC "Possible" Risk Criteria          |               |               |
| Cerebrovascular Disease               | 16572 (1.8%)  | 17255 (1.9%)  |
| Other Respiratory Disease             | 2122 (0.2%)   | 2222 (0.2%)   |
| Hypertension                          | 105348 (11%)  | 103788 (11%)  |
| Immunosuppression                     | 16999 (1.8%)  | 16990 (1.8%)  |
| Neurological Disease                  | 28901 (3.1%)  | 31076 (3.4%)  |
| Liver Disease                         | 11508 (1.2%)  | 13758 (1.5%)  |
| Overweight (BMI 25-30)                | 297793 (32%)  | 283856 (31%)  |
| Thalassemia                           | 6311 (0.7%)   | 6030 (0.7%)   |
| Type 1 Diabetes Mellitus              | 3030 (0.3%)   | 2870 (0.3%)   |

| Vaccination - Cerebrovascular Accident | 1, N = 917598 | 0, N = 917598 |
|----------------------------------------|---------------|---------------|
| Age                                    | 38 (27, 52)   | 38 (27, 52)   |
| Age Groups                             |               |               |
| 16-39                                  | 489938 (53%)  | 489938 (53%)  |
| 40-49                                  | 168245 (18%)  | 168245 (18%)  |
| 50-59                                  | 97957 (11%)   | 97957 (11%)   |
| 60-69                                  | 90432 (9.9%)  | 90432 (9.9%)  |
| 70-79                                  | 52327 (5.7%)  | 52327 (5.7%)  |
| 80+                                    | 18699 (2.0%)  | 18699 (2.0%)  |
| Sex                                    |               |               |
| F                                      | 444722 (48%)  | 444722 (48%)  |
| M                                      | 472876 (52%)  | 472876 (52%)  |
| Population Sector                      |               |               |
| General Jewish                         | 617674 (67%)  | 617674 (67%)  |
| Arab                                   | 274703 (30%)  | 274703 (30%)  |
| Ultra-Orthodox Jewish                  | 25221 (2.7%)  | 25221 (2.7%)  |
| CDC Risk Factor Count                  |               |               |
| 0                                      | 594693 (65%)  | 594693 (65%)  |
| 1                                      | 212087 (23%)  | 212087 (23%)  |
| 2                                      | 65207 (7.1%)  | 65207 (7.1%)  |
| 3                                      | 27075 (3.0%)  | 27075 (3.0%)  |
| 4+                                     | 18536 (2.0%)  | 18536 (2.0%)  |
| Flu Vaccinations in the Last 5 Years   |               |               |
| 0                                      | 585883 (64%)  | 652896 (71%)  |
| 1-2                                    | 178363 (19%)  | 152336 (17%)  |
| 3-4                                    | 75820 (8.3%)  | 61421 (6.7%)  |
| 5+                                     | 77532 (8.4%)  | 50945 (5.6%)  |
| Cancer                                 | 10137 (1.1%)  | 10573 (1.2%)  |
| CDC "Certain" Risk Criteria            |               |               |
| Chronic Kidney Disease                 | 39913 (4.3%)  | 40542 (4.4%)  |
| Chronic Obstructive Pulmonary Disease  | 9740 (1.1%)   | 11098 (1.2%)  |
| Heart Disease                          | 30838 (3.4%)  | 30638 (3.3%)  |
| Solid Organ Transplant                 | 353 (<0.1%)   | 382 (<0.1%)   |
| Obesity (BMI 30-40)                    | 133851 (15%)  | 129871 (14%)  |
| Severe Obesity (BMI 40+)               | 12324 (1.3%)  | 13150 (1.4%)  |
| Pregnancy                              | 6481 (0.7%)   | 6481 (0.7%)   |
| Sickle Cell Disease                    | 147 (<0.1%)   | 199 (<0.1%)   |
| Smoking                                | 162950 (18%)  | 193910 (21%)  |
| Type 2 Diabetes Mellitus               | 61321 (6.7%)  | 60610 (6.6%)  |
| Asthma                                 | 48567 (5.3%)  | 48985 (5.3%)  |
| CDC "Possible" Risk Criteria           |               |               |
| Cerebrovascular Disease                | 3818 (0.4%)   | 3568 (0.4%)   |
| Other Respiratory Disease              | 1900 (0.2%)   | 1995 (0.2%)   |
| Hypertension                           | 93691 (10%)   | 92213 (10%)   |
| Immunosuppression                      | 16079 (1.8%)  | 16129 (1.8%)  |
| Neurological Disease                   | 25360 (2.8%)  | 27188 (3.0%)  |
| Liver Disease                          | 10719 (1.2%)  | 12840 (1.4%)  |
| Overweight (BMI 25-30)                 | 295281 (32%)  | 281204 (31%)  |
| Thalassemia                            | 6253 (0.7%)   | 6004 (0.7%)   |
| Type 1 Diabetes Mellitus               | 2776 (0.3%)   | 2606 (0.3%)   |

| Vaccination - Deep Vein Thrombosis    | 1, N = 925380 | 0, N = 925380 |
|---------------------------------------|---------------|---------------|
| Age                                   | 38 (27, 53)   | 38 (27, 53)   |
| Age Groups                            |               |               |
| 16-39                                 | 488386 (53%)  | 488386 (53%)  |
| 40-49                                 | 166964 (18%)  | 166964 (18%)  |
| 50-59                                 | 97920 (11%)   | 97920 (11%)   |
| 60-69                                 | 93149 (10%)   | 93149 (10%)   |
| 70-79                                 | 56359 (6.1%)  | 56359 (6.1%)  |
| 80+                                   | 22602 (2.4%)  | 22602 (2.4%)  |
| Sex                                   |               |               |
| F                                     | 445956 (48%)  | 445956 (48%)  |
| M                                     | 479424 (52%)  | 479424 (52%)  |
| Population Sector                     |               |               |
| General Jewish                        | 625367 (68%)  | 625367 (68%)  |
| Arab                                  | 274876 (30%)  | 274876 (30%)  |
| Ultra-Orthodox Jewish                 | 25137 (2.7%)  | 25137 (2.7%)  |
| CDC Risk Factor Count                 |               |               |
| 0                                     | 591315 (64%)  | 591315 (64%)  |
| 1                                     | 210567 (23%)  | 210567 (23%)  |
| 2                                     | 66417 (7.2%)  | 66417 (7.2%)  |
| 3                                     | 29987 (3.2%)  | 29987 (3.2%)  |
| 4+                                    | 27094 (2.9%)  | 27094 (2.9%)  |
| Flu Vaccinations in the Last 5 Years  |               |               |
| 0                                     | 583669 (63%)  | 650639 (70%)  |
| 1-2                                   | 179549 (19%)  | 154514 (17%)  |
| 3-4                                   | 78604 (8.5%)  | 64691 (7.0%)  |
| 5+                                    | 83558 (9.0%)  | 55536 (6.0%)  |
| Cancer                                | 10796 (1.2%)  | 11229 (1.2%)  |
| CDC "Certain" Risk Criteria           |               |               |
| Chronic Kidney Disease                | 43720 (4.7%)  | 44311 (4.8%)  |
| Chronic Obstructive Pulmonary Disease | 11186 (1.2%)  | 12726 (1.4%)  |
| Heart Disease                         | 36563 (4.0%)  | 36302 (3.9%)  |
| Solid Organ Transplant                | 399 (<0.1%)   | 413 (<0.1%)   |
| Obesity (BMI 30-40)                   | 136501 (15%)  | 132162 (14%)  |
| Severe Obesity (BMI 40+)              | 12431 (1.3%)  | 13198 (1.4%)  |
| Pregnancy                             | 6408 (0.7%)   | 6408 (0.7%)   |
| Sickle Cell Disease                   | 149 (<0.1%)   | 194 (<0.1%)   |
| Smoking                               | 164356 (18%)  | 195556 (21%)  |
| Type 2 Diabetes Mellitus              | 67836 (7.3%)  | 67034 (7.2%)  |
| Asthma                                | 49609 (5.4%)  | 50029 (5.4%)  |
| CDC "Possible" Risk Criteria          |               |               |
| Cerebrovascular Disease               | 16721 (1.8%)  | 17407 (1.9%)  |
| Other Respiratory Disease             | 2062 (0.2%)   | 2166 (0.2%)   |
| Hypertension                          | 104044 (11%)  | 102382 (11%)  |
| Immunosuppression                     | 16842 (1.8%)  | 16789 (1.8%)  |
| Neurological Disease                  | 29158 (3.2%)  | 31410 (3.4%)  |
| Liver Disease                         | 11312 (1.2%)  | 13468 (1.5%)  |
| Overweight (BMI 25-30)                | 298524 (32%)  | 284433 (31%)  |
| Thalassemia                           | 6337 (0.7%)   | 6076 (0.7%)   |
| Type 1 Diabetes Mellitus              | 3037 (0.3%)   | 2884 (0.3%)   |

| Vaccination - Herpes Simplex          | 1, N = 876328 | 0, N = 876328 |
|---------------------------------------|---------------|---------------|
| Age                                   | 38 (27, 54)   | 38 (27, 54)   |
| Age Groups                            |               |               |
| 16-39                                 | 457385 (52%)  | 457385 (52%)  |
| 40-49                                 | 158016 (18%)  | 158016 (18%)  |
| 50-59                                 | 93832 (11%)   | 93832 (11%)   |
| 60-69                                 | 89988 (10%)   | 89988 (10%)   |
| 70-79                                 | 54764 (6.2%)  | 54764 (6.2%)  |
| 80+                                   | 22343 (2.5%)  | 22343 (2.5%)  |
| Sex                                   |               |               |
| F                                     | 413311 (47%)  | 413311 (47%)  |
| M                                     | 463017 (53%)  | 463017 (53%)  |
| Population Sector                     |               |               |
| General Jewish                        | 589215 (67%)  | 589215 (67%)  |
| Arab                                  | 263396 (30%)  | 263396 (30%)  |
| Ultra-Orthodox Jewish                 | 23717 (2.7%)  | 23717 (2.7%)  |
| CDC Risk Factor Count                 |               |               |
| 0                                     | 557374 (64%)  | 557374 (64%)  |
| 1                                     | 198627 (23%)  | 198627 (23%)  |
| 2                                     | 63686 (7.3%)  | 63686 (7.3%)  |
| 3                                     | 29287 (3.3%)  | 29287 (3.3%)  |
| 4+                                    | 27354 (3.1%)  | 27354 (3.1%)  |
| Flu Vaccinations in the Last 5 Years  |               |               |
| 0                                     | 552856 (63%)  | 615939 (70%)  |
| 1-2                                   | 168845 (19%)  | 145511 (17%)  |
| 3-4                                   | 74736 (8.5%)  | 61586 (7.0%)  |
| 5+                                    | 79891 (9.1%)  | 53292 (6.1%)  |
| Cancer                                | 10479 (1.2%)  | 10895 (1.2%)  |
| CDC "Certain" Risk Criteria           |               |               |
| Chronic Kidney Disease                | 42482 (4.8%)  | 42971 (4.9%)  |
| Chronic Obstructive Pulmonary Disease | 11090 (1.3%)  | 12576 (1.4%)  |
| Heart Disease                         | 36291 (4.1%)  | 36095 (4.1%)  |
| Solid Organ Transplant                | 398 (<0.1%)   | 427 (<0.1%)   |
| Obesity (BMI 30-40)                   | 131038 (15%)  | 126822 (14%)  |
| Severe Obesity (BMI 40+)              | 12127 (1.4%)  | 12838 (1.5%)  |
| Pregnancy                             | 5633 (0.6%)   | 5633 (0.6%)   |
| Sickle Cell Disease                   | 143 (<0.1%)   | 184 (<0.1%)   |
| Smoking                               | 157424 (18%)  | 186967 (21%)  |
| Type 2 Diabetes Mellitus              | 66380 (7.6%)  | 65352 (7.5%)  |
| Asthma                                | 46230 (5.3%)  | 46650 (5.3%)  |
| CDC "Possible" Risk Criteria          |               |               |
| Cerebrovascular Disease               | 16636 (1.9%)  | 17399 (2.0%)  |
| Other Respiratory Disease             | 1987 (0.2%)   | 2067 (0.2%)   |
| Hypertension                          | 101551 (12%)  | 100051 (11%)  |
| Immunosuppression                     | 15968 (1.8%)  | 15982 (1.8%)  |
| Neurological Disease                  | 28095 (3.2%)  | 30279 (3.5%)  |
| Liver Disease                         | 10970 (1.3%)  | 13162 (1.5%)  |
| Overweight (BMI 25-30)                | 283945 (32%)  | 270641 (31%)  |
| Thalassemia                           | 5968 (0.7%)   | 5713 (0.7%)   |
| Type 1 Diabetes Mellitus              | 2923 (0.3%)   | 2779 (0.3%)   |

| Vaccination - Intracranial Hemorrhage | 1, N = 933130 | 0, N = 933130 |
|---------------------------------------|---------------|---------------|
| Age                                   | 38 (27, 53)   | 38 (27, 53)   |
| Age Groups                            |               |               |
| 16-39                                 | 489826 (52%)  | 489826 (52%)  |
| 40-49                                 | 168787 (18%)  | 168787 (18%)  |
| 50-59                                 | 99542 (11%)   | 99542 (11%)   |
| 60-69                                 | 94713 (10%)   | 94713 (10%)   |
| 70-79                                 | 57334 (6.1%)  | 57334 (6.1%)  |
| 80+                                   | 22928 (2.5%)  | 22928 (2.5%)  |
| Sex                                   |               |               |
| F                                     | 452242 (48%)  | 452242 (48%)  |
| M                                     | 480888 (52%)  | 480888 (52%)  |
| Population Sector                     |               |               |
| General Jewish                        | 630875 (68%)  | 630875 (68%)  |
| Arab                                  | 276792 (30%)  | 276792 (30%)  |
| Ultra-Orthodox Jewish                 | 25463 (2.7%)  | 25463 (2.7%)  |
| CDC Risk Factor Count                 |               |               |
| 0                                     | 594395 (64%)  | 594395 (64%)  |
| 1                                     | 213221 (23%)  | 213221 (23%)  |
| 2                                     | 68028 (7.3%)  | 68028 (7.3%)  |
| 3                                     | 30653 (3.3%)  | 30653 (3.3%)  |
| 4+                                    | 26833 (2.9%)  | 26833 (2.9%)  |
| Flu Vaccinations in the Last 5 Years  |               |               |
| 0                                     | 586791 (63%)  | 654438 (70%)  |
| 1-2                                   | 181389 (19%)  | 156310 (17%)  |
| 3-4                                   | 79860 (8.6%)  | 65850 (7.1%)  |
| 5+                                    | 85090 (9.1%)  | 56532 (6.1%)  |
| Cancer                                | 11174 (1.2%)  | 11584 (1.2%)  |
| CDC "Certain" Risk Criteria           |               |               |
| Chronic Kidney Disease                | 44380 (4.8%)  | 44979 (4.8%)  |
| Chronic Obstructive Pulmonary Disease | 11420 (1.2%)  | 13007 (1.4%)  |
| Heart Disease                         | 36962 (4.0%)  | 36743 (3.9%)  |
| Solid Organ Transplant                | 425 (<0.1%)   | 454 (<0.1%)   |
| Obesity (BMI 30-40)                   | 139288 (15%)  | 134986 (14%)  |
| Severe Obesity (BMI 40+)              | 12862 (1.4%)  | 13713 (1.5%)  |
| Pregnancy                             | 6489 (0.7%)   | 6489 (0.7%)   |
| Sickle Cell Disease                   | 149 (<0.1%)   | 199 (<0.1%)   |
| Smoking                               | 165514 (18%)  | 196863 (21%)  |
| Type 2 Diabetes Mellitus              | 68884 (7.4%)  | 67981 (7.3%)  |
| Asthma                                | 50153 (5.4%)  | 50512 (5.4%)  |
| CDC "Possible" Risk Criteria          |               |               |
| Cerebrovascular Disease               | 14273 (1.5%)  | 14712 (1.6%)  |
| Other Respiratory Disease             | 2123 (0.2%)   | 2237 (0.2%)   |
| Hypertension                          | 105603 (11%)  | 104036 (11%)  |
| Immunosuppression                     | 17358 (1.9%)  | 17449 (1.9%)  |
| Neurological Disease                  | 28945 (3.1%)  | 31125 (3.3%)  |
| Liver Disease                         | 11654 (1.2%)  | 13886 (1.5%)  |
| Overweight (BMI 25-30)                | 301154 (32%)  | 286985 (31%)  |
| Thalassemia                           | 6401 (0.7%)   | 6130 (0.7%)   |
| Type 1 Diabetes Mellitus              | 3064 (0.3%)   | 2922 (0.3%)   |

| Vaccination - Lymphadenopathy         | 1, N = 823006 | 0, N = 823006 |
|---------------------------------------|---------------|---------------|
| Age                                   | 39 (28, 54)   | 39 (28, 54)   |
| Age Groups                            |               |               |
| 16-39                                 | 423244 (51%)  | 423244 (51%)  |
| 40-49                                 | 149746 (18%)  | 149746 (18%)  |
| 50-59                                 | 89506 (11%)   | 89506 (11%)   |
| 60-69                                 | 85722 (10%)   | 85722 (10%)   |
| 70-79                                 | 52864 (6.4%)  | 52864 (6.4%)  |
| 80+                                   | 21924 (2.7%)  | 21924 (2.7%)  |
| Sex                                   |               |               |
| F                                     | 386928 (47%)  | 386928 (47%)  |
| M                                     | 436078 (53%)  | 436078 (53%)  |
| Population Sector                     |               |               |
| General Jewish                        | 551309 (67%)  | 551309 (67%)  |
| Arab                                  | 249380 (30%)  | 249380 (30%)  |
| Ultra-Orthodox Jewish                 | 22317 (2.7%)  | 22317 (2.7%)  |
| CDC Risk Factor Count                 |               |               |
| 0                                     | 523301 (64%)  | 523301 (64%)  |
| 1                                     | 186501 (23%)  | 186501 (23%)  |
| 2                                     | 60170 (7.3%)  | 60170 (7.3%)  |
| 3                                     | 27721 (3.4%)  | 27721 (3.4%)  |
| 4+                                    | 25313 (3.1%)  | 25313 (3.1%)  |
| Flu Vaccinations in the Last 5 Years  |               |               |
| 0                                     | 519933 (63%)  | 578854 (70%)  |
| 1-2                                   | 157483 (19%)  | 136012 (17%)  |
| 3-4                                   | 69993 (8.5%)  | 57830 (7.0%)  |
| 5+                                    | 75597 (9.2%)  | 50310 (6.1%)  |
| Cancer                                | 9311 (1.1%)   | 9544 (1.2%)   |
| CDC "Certain" Risk Criteria           |               |               |
| Chronic Kidney Disease                | 39653 (4.8%)  | 40047 (4.9%)  |
| Chronic Obstructive Pulmonary Disease | 10161 (1.2%)  | 11546 (1.4%)  |
| Heart Disease                         | 34420 (4.2%)  | 34084 (4.1%)  |
| Solid Organ Transplant                | 379 (<0.1%)   | 384 (<0.1%)   |
| Obesity (BMI 30-40)                   | 124199 (15%)  | 120273 (15%)  |
| Severe Obesity (BMI 40+)              | 11385 (1.4%)  | 12174 (1.5%)  |
| Pregnancy                             | 5160 (0.6%)   | 5160 (0.6%)   |
| Sickle Cell Disease                   | 122 (<0.1%)   | 159 (<0.1%)   |
| Smoking                               | 146749 (18%)  | 174346 (21%)  |
| Type 2 Diabetes Mellitus              | 62891 (7.6%)  | 62040 (7.5%)  |
| Asthma                                | 41806 (5.1%)  | 42015 (5.1%)  |
| CDC "Possible" Risk Criteria          |               |               |
| Cerebrovascular Disease               | 15609 (1.9%)  | 16378 (2.0%)  |
| Other Respiratory Disease             | 1804 (0.2%)   | 1832 (0.2%)   |
| Hypertension                          | 96251 (12%)   | 95078 (12%)   |
| Immunosuppression                     | 14617 (1.8%)  | 14557 (1.8%)  |
| Neurological Disease                  | 26403 (3.2%)  | 28402 (3.5%)  |
| Liver Disease                         | 10135 (1.2%)  | 12220 (1.5%)  |
| Overweight (BMI 25-30)                | 270297 (33%)  | 257477 (31%)  |
| Thalassemia                           | 5367 (0.7%)   | 5164 (0.6%)   |
| Type 1 Diabetes Mellitus              | 2703 (0.3%)   | 2577 (0.3%)   |



| Vaccination - Lymphopenia             | 1, N = 938939 | 0, N = 938939 |
|---------------------------------------|---------------|---------------|
| Age                                   | 38 (27, 54)   | 38 (27, 54)   |
| Age Groups                            |               |               |
| 16-39                                 | 490003 (52%)  | 490003 (52%)  |
| 40-49                                 | 169010 (18%)  | 169010 (18%)  |
| 50-59                                 | 100038 (11%)  | 100038 (11%)  |
| 60-69                                 | 96186 (10%)   | 96186 (10%)   |
| 70-79                                 | 59181 (6.3%)  | 59181 (6.3%)  |
| 80+                                   | 24521 (2.6%)  | 24521 (2.6%)  |
| Sex                                   |               |               |
| F                                     | 454318 (48%)  | 454318 (48%)  |
| M                                     | 484621 (52%)  | 484621 (52%)  |
| Population Sector                     |               |               |
| General Jewish                        | 635654 (68%)  | 635654 (68%)  |
| Arab                                  | 277732 (30%)  | 277732 (30%)  |
| Ultra-Orthodox Jewish                 | 25553 (2.7%)  | 25553 (2.7%)  |
| CDC Risk Factor Count                 |               |               |
| 0                                     | 594357 (63%)  | 594357 (63%)  |
| 1                                     | 213850 (23%)  | 213850 (23%)  |
| 2                                     | 69054 (7.4%)  | 69054 (7.4%)  |
| 3                                     | 31863 (3.4%)  | 31863 (3.4%)  |
| 4+                                    | 29815 (3.2%)  | 29815 (3.2%)  |
| Flu Vaccinations in the Last 5 Years  |               |               |
| 0                                     | 587418 (63%)  | 655268 (70%)  |
| 1-2                                   | 182439 (19%)  | 157729 (17%)  |
| 3-4                                   | 81262 (8.7%)  | 67310 (7.2%)  |
| 5+                                    | 87820 (9.4%)  | 58632 (6.2%)  |
| Cancer                                | 11470 (1.2%)  | 11895 (1.3%)  |
| CDC "Certain" Risk Criteria           |               |               |
| Chronic Kidney Disease                | 46022 (4.9%)  | 46616 (5.0%)  |
| Chronic Obstructive Pulmonary Disease | 12021 (1.3%)  | 13642 (1.5%)  |
| Heart Disease                         | 39157 (4.2%)  | 38877 (4.1%)  |
| Solid Organ Transplant                | 438 (<0.1%)   | 468 (<0.1%)   |
| Obesity (BMI 30-40)                   | 141236 (15%)  | 136765 (15%)  |
| Severe Obesity (BMI 40+)              | 13067 (1.4%)  | 13862 (1.5%)  |
| Pregnancy                             | 6479 (0.7%)   | 6479 (0.7%)   |
| Sickle Cell Disease                   | 152 (<0.1%)   | 199 (<0.1%)   |
| Smoking                               | 166630 (18%)  | 198139 (21%)  |
| Type 2 Diabetes Mellitus              | 71518 (7.6%)  | 70563 (7.5%)  |
| Asthma                                | 50697 (5.4%)  | 51014 (5.4%)  |
| CDC "Possible" Risk Criteria          |               |               |
| Cerebrovascular Disease               | 18068 (1.9%)  | 18868 (2.0%)  |
| Other Respiratory Disease             | 2209 (0.2%)   | 2302 (0.2%)   |
| Hypertension                          | 109865 (12%)  | 108227 (12%)  |
| Immunosuppression                     | 17754 (1.9%)  | 17794 (1.9%)  |
| Neurological Disease                  | 30679 (3.3%)  | 33095 (3.5%)  |
| Liver Disease                         | 11916 (1.3%)  | 14193 (1.5%)  |
| Overweight (BMI 25-30)                | 303430 (32%)  | 289245 (31%)  |
| Thalassemia                           | 6453 (0.7%)   | 6173 (0.7%)   |
| Type 1 Diabetes Mellitus              | 3159 (0.3%)   | 3023 (0.3%)   |

| Vaccination - Myocardial Infarction   | 1, N = 892785 | 0, N = 892785 |
|---------------------------------------|---------------|---------------|
| Age                                   | 37 (27, 51)   | 37 (27, 51)   |
| Age Groups                            |               |               |
| 16-39                                 | 489947 (55%)  | 489947 (55%)  |
| 40-49                                 | 167071 (19%)  | 167071 (19%)  |
| 50-59                                 | 94233 (11%)   | 94233 (11%)   |
| 60-69                                 | 82170 (9.2%)  | 82170 (9.2%)  |
| 70-79                                 | 44550 (5.0%)  | 44550 (5.0%)  |
| 80+                                   | 14814 (1.7%)  | 14814 (1.7%)  |
| Sex                                   |               |               |
| F                                     | 440552 (49%)  | 440552 (49%)  |
| M                                     | 452233 (51%)  | 452233 (51%)  |
| Population Sector                     |               |               |
| General Jewish                        | 597758 (67%)  | 597758 (67%)  |
| Arab                                  | 270182 (30%)  | 270182 (30%)  |
| Ultra-Orthodox Jewish                 | 24845 (2.8%)  | 24845 (2.8%)  |
| CDC Risk Factor Count                 |               |               |
| 0                                     | 594125 (67%)  | 594125 (67%)  |
| 1                                     | 208261 (23%)  | 208261 (23%)  |
| 2                                     | 59266 (6.6%)  | 59266 (6.6%)  |
| 3                                     | 20893 (2.3%)  | 20893 (2.3%)  |
| 4+                                    | 10240 (1.1%)  | 10240 (1.1%)  |
| Flu Vaccinations in the Last 5 Years  |               |               |
| 0                                     | 583464 (65%)  | 649445 (73%)  |
| 1-2                                   | 173367 (19%)  | 146037 (16%)  |
| 3-4                                   | 69825 (7.8%)  | 55078 (6.2%)  |
| 5+                                    | 66129 (7.4%)  | 42225 (4.7%)  |
| Cancer                                | 8798 (1.0%)   | 9047 (1.0%)   |
| CDC "Certain" Risk Criteria           |               |               |
| Chronic Kidney Disease                | 33677 (3.8%)  | 34113 (3.8%)  |
| Chronic Obstructive Pulmonary Disease | 7392 (0.8%)   | 8265 (0.9%)   |
| Heart Disease                         | 4027 (0.5%)   | 4355 (0.5%)   |
| Solid Organ Transplant                | 251 (<0.1%)   | 243 (<0.1%)   |
| Obesity (BMI 30-40)                   | 125751 (14%)  | 121904 (14%)  |
| Severe Obesity (BMI 40+)              | 11784 (1.3%)  | 12418 (1.4%)  |
| Pregnancy                             | 6489 (0.7%)   | 6489 (0.7%)   |
| Sickle Cell Disease                   | 147 (<0.1%)   | 186 (<0.1%)   |
| Smoking                               | 158117 (18%)  | 188323 (21%)  |
| Type 2 Diabetes Mellitus              | 50033 (5.6%)  | 49329 (5.5%)  |
| Asthma                                | 46948 (5.3%)  | 47116 (5.3%)  |
| CDC "Possible" Risk Criteria          |               |               |
| Cerebrovascular Disease               | 10593 (1.2%)  | 10930 (1.2%)  |
| Other Respiratory Disease             | 1609 (0.2%)   | 1688 (0.2%)   |
| Hypertension                          | 77365 (8.7%)  | 76065 (8.5%)  |
| Immunosuppression                     | 14441 (1.6%)  | 14326 (1.6%)  |
| Neurological Disease                  | 24602 (2.8%)  | 26534 (3.0%)  |
| Liver Disease                         | 9494 (1.1%)   | 11417 (1.3%)  |
| Overweight (BMI 25-30)                | 284357 (32%)  | 270784 (30%)  |
| Thalassemia                           | 6096 (0.7%)   | 5871 (0.7%)   |
| Type 1 Diabetes Mellitus              | 2465 (0.3%)   | 2259 (0.3%)   |

| Vaccination - Myocarditis             | 1, N = 938812 | 0, N = 938812 |
|---------------------------------------|---------------|---------------|
| Age                                   | 38 (27, 54)   | 38 (27, 54)   |
| Age Groups                            |               |               |
| 16-39                                 | 489880 (52%)  | 489880 (52%)  |
| 40-49                                 | 168875 (18%)  | 168875 (18%)  |
| 50-59                                 | 99993 (11%)   | 99993 (11%)   |
| 60-69                                 | 96217 (10%)   | 96217 (10%)   |
| 70-79                                 | 59262 (6.3%)  | 59262 (6.3%)  |
| 80+                                   | 24585 (2.6%)  | 24585 (2.6%)  |
| Sex                                   |               |               |
| F                                     | 454896 (48%)  | 454896 (48%)  |
| M                                     | 483916 (52%)  | 483916 (52%)  |
| Population Sector                     |               |               |
| General Jewish                        | 635672 (68%)  | 635672 (68%)  |
| Arab                                  | 277585 (30%)  | 277585 (30%)  |
| Ultra-Orthodox Jewish                 | 25555 (2.7%)  | 25555 (2.7%)  |
| CDC Risk Factor Count                 |               |               |
| 0                                     | 594344 (63%)  | 594344 (63%)  |
| 1                                     | 213762 (23%)  | 213762 (23%)  |
| 2                                     | 69030 (7.4%)  | 69030 (7.4%)  |
| 3                                     | 31856 (3.4%)  | 31856 (3.4%)  |
| 4+                                    | 29820 (3.2%)  | 29820 (3.2%)  |
| Flu Vaccinations in the Last 5 Years  |               |               |
| 0                                     | 587199 (63%)  | 655035 (70%)  |
| 1-2                                   | 182407 (19%)  | 157737 (17%)  |
| 3-4                                   | 81303 (8.7%)  | 67368 (7.2%)  |
| 5+                                    | 87903 (9.4%)  | 58672 (6.2%)  |
| Cancer                                | 11537 (1.2%)  | 11944 (1.3%)  |
| CDC "Certain" Risk Criteria           |               |               |
| Chronic Kidney Disease                | 46024 (4.9%)  | 46624 (5.0%)  |
| Chronic Obstructive Pulmonary Disease | 12028 (1.3%)  | 13645 (1.5%)  |
| Heart Disease                         | 38936 (4.1%)  | 38673 (4.1%)  |
| Solid Organ Transplant                | 450 (<0.1%)   | 477 (<0.1%)   |
| Obesity (BMI 30-40)                   | 141094 (15%)  | 136647 (15%)  |
| Severe Obesity (BMI 40+)              | 13065 (1.4%)  | 13850 (1.5%)  |
| Pregnancy                             | 6483 (0.7%)   | 6483 (0.7%)   |
| Sickle Cell Disease                   | 151 (<0.1%)   | 199 (<0.1%)   |
| Smoking                               | 166411 (18%)  | 197854 (21%)  |
| Type 2 Diabetes Mellitus              | 71521 (7.6%)  | 70559 (7.5%)  |
| Asthma                                | 50702 (5.4%)  | 51019 (5.4%)  |
| CDC "Possible" Risk Criteria          |               |               |
| Cerebrovascular Disease               | 18100 (1.9%)  | 18896 (2.0%)  |
| Other Respiratory Disease             | 2218 (0.2%)   | 2308 (0.2%)   |
| Hypertension                          | 109878 (12%)  | 108188 (12%)  |
| Immunosuppression                     | 17785 (1.9%)  | 17830 (1.9%)  |
| Neurological Disease                  | 30740 (3.3%)  | 33171 (3.5%)  |
| Liver Disease                         | 11960 (1.3%)  | 14254 (1.5%)  |
| Overweight (BMI 25-30)                | 303236 (32%)  | 288972 (31%)  |
| Thalassemia                           | 6460 (0.7%)   | 6178 (0.7%)   |
| Type 1 Diabetes Mellitus              | 3167 (0.3%)   | 3033 (0.3%)   |

| Vaccination - Neutropenia             | 1, N = 919291 | 0, N = 919291 |
|---------------------------------------|---------------|---------------|
| Age                                   | 38 (27, 54)   | 38 (27, 54)   |
| Age Groups                            |               |               |
| 16-39                                 | 481193 (52%)  | 481193 (52%)  |
| 40-49                                 | 165831 (18%)  | 165831 (18%)  |
| 50-59                                 | 97852 (11%)   | 97852 (11%)   |
| 60-69                                 | 93505 (10%)   | 93505 (10%)   |
| 70-79                                 | 57244 (6.2%)  | 57244 (6.2%)  |
| 80+                                   | 23666 (2.6%)  | 23666 (2.6%)  |
| Sex                                   |               |               |
| F                                     | 441581 (48%)  | 441581 (48%)  |
| M                                     | 477710 (52%)  | 477710 (52%)  |
| Population Sector                     |               |               |
| General Jewish                        | 620972 (68%)  | 620972 (68%)  |
| Arab                                  | 273253 (30%)  | 273253 (30%)  |
| Ultra-Orthodox Jewish                 | 25066 (2.7%)  | 25066 (2.7%)  |
| CDC Risk Factor Count                 |               |               |
| 0                                     | 583292 (63%)  | 583292 (63%)  |
| 1                                     | 209052 (23%)  | 209052 (23%)  |
| 2                                     | 67190 (7.3%)  | 67190 (7.3%)  |
| 3                                     | 30913 (3.4%)  | 30913 (3.4%)  |
| 4+                                    | 28844 (3.1%)  | 28844 (3.1%)  |
| Flu Vaccinations in the Last 5 Years  |               |               |
| 0                                     | 577791 (63%)  | 644181 (70%)  |
| 1-2                                   | 178032 (19%)  | 153615 (17%)  |
| 3-4                                   | 78768 (8.6%)  | 65090 (7.1%)  |
| 5+                                    | 84700 (9.2%)  | 56405 (6.1%)  |
| Cancer                                | 10651 (1.2%)  | 10997 (1.2%)  |
| CDC "Certain" Risk Criteria           |               |               |
| Chronic Kidney Disease                | 44710 (4.9%)  | 45249 (4.9%)  |
| Chronic Obstructive Pulmonary Disease | 11683 (1.3%)  | 13272 (1.4%)  |
| Heart Disease                         | 38068 (4.1%)  | 37882 (4.1%)  |
| Solid Organ Transplant                | 397 (<0.1%)   | 422 (<0.1%)   |
| Obesity (BMI 30-40)                   | 138573 (15%)  | 134326 (15%)  |
| Severe Obesity (BMI 40+)              | 12863 (1.4%)  | 13650 (1.5%)  |
| Pregnancy                             | 6292 (0.7%)   | 6292 (0.7%)   |
| Sickle Cell Disease                   | 146 (<0.1%)   | 193 (<0.1%)   |
| Smoking                               | 164543 (18%)  | 195772 (21%)  |
| Type 2 Diabetes Mellitus              | 69892 (7.6%)  | 68907 (7.5%)  |
| Asthma                                | 49400 (5.4%)  | 49618 (5.4%)  |
| CDC "Possible" Risk Criteria          |               |               |
| Cerebrovascular Disease               | 17490 (1.9%)  | 18328 (2.0%)  |
| Other Respiratory Disease             | 2126 (0.2%)   | 2183 (0.2%)   |
| Hypertension                          | 106778 (12%)  | 105297 (11%)  |
| Immunosuppression                     | 16884 (1.8%)  | 16876 (1.8%)  |
| Neurological Disease                  | 29550 (3.2%)  | 31875 (3.5%)  |
| Liver Disease                         | 11329 (1.2%)  | 13462 (1.5%)  |
| Overweight (BMI 25-30)                | 297868 (32%)  | 283896 (31%)  |
| Thalassemia                           | 6268 (0.7%)   | 6010 (0.7%)   |
| Type 1 Diabetes Mellitus              | 3084 (0.3%)   | 2946 (0.3%)   |

| Vaccination - Other Thrombosis        | 1, N = 932469 | 0, N = 932469 |
|---------------------------------------|---------------|---------------|
| Age                                   | 38 (27, 53)   | 38 (27, 53)   |
| Age Groups                            |               |               |
| 16-39                                 | 489694 (53%)  | 489694 (53%)  |
| 40-49                                 | 168196 (18%)  | 168196 (18%)  |
| 50-59                                 | 99023 (11%)   | 99023 (11%)   |
| 60-69                                 | 94483 (10%)   | 94483 (10%)   |
| 70-79                                 | 57592 (6.2%)  | 57592 (6.2%)  |
| 80+                                   | 23481 (2.5%)  | 23481 (2.5%)  |
| Sex                                   |               |               |
| F                                     | 451164 (48%)  | 451164 (48%)  |
| M                                     | 481305 (52%)  | 481305 (52%)  |
| Population Sector                     |               |               |
| General Jewish                        | 630547 (68%)  | 630547 (68%)  |
| Arab                                  | 276499 (30%)  | 276499 (30%)  |
| Ultra-Orthodox Jewish                 | 25423 (2.7%)  | 25423 (2.7%)  |
| CDC Risk Factor Count                 |               |               |
| 0                                     | 593509 (64%)  | 593509 (64%)  |
| 1                                     | 212555 (23%)  | 212555 (23%)  |
| 2                                     | 67733 (7.3%)  | 67733 (7.3%)  |
| 3                                     | 30762 (3.3%)  | 30762 (3.3%)  |
| 4+                                    | 27910 (3.0%)  | 27910 (3.0%)  |
| Flu Vaccinations in the Last 5 Years  |               |               |
| 0                                     | 586105 (63%)  | 653644 (70%)  |
| 1-2                                   | 181136 (19%)  | 156138 (17%)  |
| 3-4                                   | 79878 (8.6%)  | 65866 (7.1%)  |
| 5+                                    | 85350 (9.2%)  | 56821 (6.1%)  |
| Cancer                                | 11107 (1.2%)  | 11495 (1.2%)  |
| CDC "Certain" Risk Criteria           |               |               |
| Chronic Kidney Disease                | 44549 (4.8%)  | 45106 (4.8%)  |
| Chronic Obstructive Pulmonary Disease | 11458 (1.2%)  | 12967 (1.4%)  |
| Heart Disease                         | 37051 (4.0%)  | 36750 (3.9%)  |
| Solid Organ Transplant                | 406 (<0.1%)   | 424 (<0.1%)   |
| Obesity (BMI 30-40)                   | 139034 (15%)  | 134704 (14%)  |
| Severe Obesity (BMI 40+)              | 12801 (1.4%)  | 13601 (1.5%)  |
| Pregnancy                             | 6464 (0.7%)   | 6464 (0.7%)   |
| Sickle Cell Disease                   | 151 (<0.1%)   | 197 (<0.1%)   |
| Smoking                               | 165236 (18%)  | 196549 (21%)  |
| Type 2 Diabetes Mellitus              | 69222 (7.4%)  | 68369 (7.3%)  |
| Asthma                                | 50186 (5.4%)  | 50533 (5.4%)  |
| CDC "Possible" Risk Criteria          |               |               |
| Cerebrovascular Disease               | 17093 (1.8%)  | 17825 (1.9%)  |
| Other Respiratory Disease             | 2130 (0.2%)   | 2220 (0.2%)   |
| Hypertension                          | 106368 (11%)  | 104740 (11%)  |
| Immunosuppression                     | 17274 (1.9%)  | 17290 (1.9%)  |
| Neurological Disease                  | 29767 (3.2%)  | 32148 (3.4%)  |
| Liver Disease                         | 11459 (1.2%)  | 13688 (1.5%)  |
| Overweight (BMI 25-30)                | 300980 (32%)  | 286765 (31%)  |
| Thalassemia                           | 6388 (0.7%)   | 6121 (0.7%)   |
| Type 1 Diabetes Mellitus              | 3086 (0.3%)   | 2937 (0.3%)   |

| Vaccination - Paresthesia             | 1, N = 827478 | 0, N = 827478 |
|---------------------------------------|---------------|---------------|
| Age                                   | 37 (26, 51)   | 37 (26, 51)   |
| Age Groups                            |               |               |
| 16-39                                 | 463853 (56%)  | 463853 (56%)  |
| 40-49                                 | 144833 (18%)  | 144833 (18%)  |
| 50-59                                 | 79956 (9.7%)  | 79956 (9.7%)  |
| 60-69                                 | 74625 (9.0%)  | 74625 (9.0%)  |
| 70-79                                 | 45826 (5.5%)  | 45826 (5.5%)  |
| 80+                                   | 18385 (2.2%)  | 18385 (2.2%)  |
| Sex                                   |               |               |
| F                                     | 389734 (47%)  | 389734 (47%)  |
| M                                     | 437744 (53%)  | 437744 (53%)  |
| Population Sector                     |               |               |
| General Jewish                        | 554832 (67%)  | 554832 (67%)  |
| Arab                                  | 249031 (30%)  | 249031 (30%)  |
| Ultra-Orthodox Jewish                 | 23615 (2.9%)  | 23615 (2.9%)  |
| CDC Risk Factor Count                 |               |               |
| 0                                     | 549329 (66%)  | 549329 (66%)  |
| 1                                     | 184011 (22%)  | 184011 (22%)  |
| 2                                     | 52681 (6.4%)  | 52681 (6.4%)  |
| 3                                     | 22321 (2.7%)  | 22321 (2.7%)  |
| 4+                                    | 19136 (2.3%)  | 19136 (2.3%)  |
| Flu Vaccinations in the Last 5 Years  |               |               |
| 0                                     | 539189 (65%)  | 598819 (72%)  |
| 1-2                                   | 158111 (19%)  | 134214 (16%)  |
| 3-4                                   | 64793 (7.8%)  | 51904 (6.3%)  |
| 5+                                    | 65385 (7.9%)  | 42541 (5.1%)  |
| Cancer                                | 8622 (1.0%)   | 8917 (1.1%)   |
| CDC "Certain" Risk Criteria           |               |               |
| Chronic Kidney Disease                | 34808 (4.2%)  | 35315 (4.3%)  |
| Chronic Obstructive Pulmonary Disease | 8403 (1.0%)   | 9568 (1.2%)   |
| Heart Disease                         | 27638 (3.3%)  | 27621 (3.3%)  |
| Solid Organ Transplant                | 288 (<0.1%)   | 317 (<0.1%)   |
| Obesity (BMI 30-40)                   | 113688 (14%)  | 109680 (13%)  |
| Severe Obesity (BMI 40+)              | 10302 (1.2%)  | 10937 (1.3%)  |
| Pregnancy                             | 5833 (0.7%)   | 5833 (0.7%)   |
| Sickle Cell Disease                   | 135 (<0.1%)   | 178 (<0.1%)   |
| Smoking                               | 145536 (18%)  | 173757 (21%)  |
| Type 2 Diabetes Mellitus              | 51894 (6.3%)  | 51255 (6.2%)  |
| Asthma                                | 43452 (5.3%)  | 43717 (5.3%)  |
| CDC "Possible" Risk Criteria          |               |               |
| Cerebrovascular Disease               | 11261 (1.4%)  | 11865 (1.4%)  |
| Other Respiratory Disease             | 1590 (0.2%)   | 1674 (0.2%)   |
| Hypertension                          | 80778 (9.8%)  | 79375 (9.6%)  |
| Immunosuppression                     | 12790 (1.5%)  | 12894 (1.6%)  |
| Neurological Disease                  | 22170 (2.7%)  | 24018 (2.9%)  |
| Liver Disease                         | 8962 (1.1%)   | 10798 (1.3%)  |
| Overweight (BMI 25-30)                | 261959 (32%)  | 249158 (30%)  |
| Thalassemia                           | 5561 (0.7%)   | 5318 (0.6%)   |
| Type 1 Diabetes Mellitus              | 2377 (0.3%)   | 2248 (0.3%)   |

| Vaccination - Pulmonary Embolism      | 1, N = 937116 | 0, N = 937116 |
|---------------------------------------|---------------|---------------|
| Age                                   | 38 (27, 54)   | 38 (27, 54)   |
| Age Groups                            |               |               |
| 16-39                                 | 490222 (52%)  | 490222 (52%)  |
| 40-49                                 | 168767 (18%)  | 168767 (18%)  |
| 50-59                                 | 99778 (11%)   | 99778 (11%)   |
| 60-69                                 | 95732 (10%)   | 95732 (10%)   |
| 70-79                                 | 58621 (6.3%)  | 58621 (6.3%)  |
| 80+                                   | 23996 (2.6%)  | 23996 (2.6%)  |
| Sex                                   |               |               |
| F                                     | 453214 (48%)  | 453214 (48%)  |
| M                                     | 483902 (52%)  | 483902 (52%)  |
| Population Sector                     |               |               |
| General Jewish                        | 634122 (68%)  | 634122 (68%)  |
| Arab                                  | 277482 (30%)  | 277482 (30%)  |
| Ultra-Orthodox Jewish                 | 25512 (2.7%)  | 25512 (2.7%)  |
| CDC Risk Factor Count                 |               |               |
| 0                                     | 594406 (63%)  | 594406 (63%)  |
| 1                                     | 213512 (23%)  | 213512 (23%)  |
| 2                                     | 68631 (7.3%)  | 68631 (7.3%)  |
| 3                                     | 31457 (3.4%)  | 31457 (3.4%)  |
| 4+                                    | 29110 (3.1%)  | 29110 (3.1%)  |
| Flu Vaccinations in the Last 5 Years  |               |               |
| 0                                     | 587265 (63%)  | 655062 (70%)  |
| 1-2                                   | 182132 (19%)  | 157259 (17%)  |
| 3-4                                   | 80806 (8.6%)  | 66834 (7.1%)  |
| 5+                                    | 86913 (9.3%)  | 57961 (6.2%)  |
| Cancer                                | 11331 (1.2%)  | 11744 (1.3%)  |
| CDC "Certain" Risk Criteria           |               |               |
| Chronic Kidney Disease                | 45468 (4.9%)  | 46071 (4.9%)  |
| Chronic Obstructive Pulmonary Disease | 11813 (1.3%)  | 13387 (1.4%)  |
| Heart Disease                         | 38451 (4.1%)  | 38144 (4.1%)  |
| Solid Organ Transplant                | 437 (<0.1%)   | 466 (<0.1%)   |
| Obesity (BMI 30-40)                   | 140381 (15%)  | 135933 (15%)  |
| Severe Obesity (BMI 40+)              | 12952 (1.4%)  | 13727 (1.5%)  |
| Pregnancy                             | 6473 (0.7%)   | 6473 (0.7%)   |
| Sickle Cell Disease                   | 149 (<0.1%)   | 198 (<0.1%)   |
| Smoking                               | 166293 (18%)  | 197722 (21%)  |
| Type 2 Diabetes Mellitus              | 70741 (7.5%)  | 69841 (7.5%)  |
| Asthma                                | 50520 (5.4%)  | 50853 (5.4%)  |
| CDC "Possible" Risk Criteria          |               |               |
| Cerebrovascular Disease               | 17767 (1.9%)  | 18528 (2.0%)  |
| Other Respiratory Disease             | 2172 (0.2%)   | 2263 (0.2%)   |
| Hypertension                          | 108600 (12%)  | 106955 (11%)  |
| Immunosuppression                     | 17571 (1.9%)  | 17614 (1.9%)  |
| Neurological Disease                  | 30329 (3.2%)  | 32736 (3.5%)  |
| Liver Disease                         | 11822 (1.3%)  | 14101 (1.5%)  |
| Overweight (BMI 25-30)                | 302671 (32%)  | 288518 (31%)  |
| Thalassemia                           | 6441 (0.7%)   | 6155 (0.7%)   |
| Type 1 Diabetes Mellitus              | 3145 (0.3%)   | 3006 (0.3%)   |

| Vaccination - Pericarditis            | 1, N = 936197 | 0, N = 936197 |
|---------------------------------------|---------------|---------------|
| Age                                   | 38 (27, 54)   | 38 (27, 54)   |
| Age Groups                            |               |               |
| 16-39                                 | 489466 (52%)  | 489466 (52%)  |
| 40-49                                 | 168560 (18%)  | 168560 (18%)  |
| 50-59                                 | 99629 (11%)   | 99629 (11%)   |
| 60-69                                 | 95631 (10%)   | 95631 (10%)   |
| 70-79                                 | 58713 (6.3%)  | 58713 (6.3%)  |
| 80+                                   | 24198 (2.6%)  | 24198 (2.6%)  |
| Sex                                   |               |               |
| F                                     | 453786 (48%)  | 453786 (48%)  |
| M                                     | 482411 (52%)  | 482411 (52%)  |
| Population Sector                     |               |               |
| General Jewish                        | 633758 (68%)  | 633758 (68%)  |
| Arab                                  | 276944 (30%)  | 276944 (30%)  |
| Ultra-Orthodox Jewish                 | 25495 (2.7%)  | 25495 (2.7%)  |
| CDC Risk Factor Count                 |               |               |
| 0                                     | 593680 (63%)  | 593680 (63%)  |
| 1                                     | 213266 (23%)  | 213266 (23%)  |
| 2                                     | 68623 (7.3%)  | 68623 (7.3%)  |
| 3                                     | 31508 (3.4%)  | 31508 (3.4%)  |
| 4+                                    | 29120 (3.1%)  | 29120 (3.1%)  |
| Flu Vaccinations in the Last 5 Years  |               |               |
| 0                                     | 586450 (63%)  | 654147 (70%)  |
| 1-2                                   | 181935 (19%)  | 157224 (17%)  |
| 3-4                                   | 80802 (8.6%)  | 66860 (7.1%)  |
| 5+                                    | 87010 (9.3%)  | 57966 (6.2%)  |
| Cancer                                | 11368 (1.2%)  | 11791 (1.3%)  |
| CDC "Certain" Risk Criteria           |               |               |
| Chronic Kidney Disease                | 45457 (4.9%)  | 46084 (4.9%)  |
| Chronic Obstructive Pulmonary Disease | 11825 (1.3%)  | 13422 (1.4%)  |
| Heart Disease                         | 38136 (4.1%)  | 37850 (4.0%)  |
| Solid Organ Transplant                | 422 (<0.1%)   | 456 (<0.1%)   |
| Obesity (BMI 30-40)                   | 140419 (15%)  | 135951 (15%)  |
| Severe Obesity (BMI 40+)              | 12992 (1.4%)  | 13766 (1.5%)  |
| Pregnancy                             | 6481 (0.7%)   | 6481 (0.7%)   |
| Sickle Cell Disease                   | 149 (<0.1%)   | 196 (<0.1%)   |
| Smoking                               | 165874 (18%)  | 197310 (21%)  |
| Type 2 Diabetes Mellitus              | 70757 (7.6%)  | 69791 (7.5%)  |
| Asthma                                | 50470 (5.4%)  | 50818 (5.4%)  |
| CDC "Possible" Risk Criteria          |               |               |
| Cerebrovascular Disease               | 17779 (1.9%)  | 18536 (2.0%)  |
| Other Respiratory Disease             | 2187 (0.2%)   | 2285 (0.2%)   |
| Hypertension                          | 108647 (12%)  | 107036 (11%)  |
| Immunosuppression                     | 17550 (1.9%)  | 17571 (1.9%)  |
| Neurological Disease                  | 30483 (3.3%)  | 32836 (3.5%)  |
| Liver Disease                         | 11813 (1.3%)  | 14115 (1.5%)  |
| Overweight (BMI 25-30)                | 302235 (32%)  | 288108 (31%)  |
| Thalassemia                           | 6435 (0.7%)   | 6150 (0.7%)   |
| Type 1 Diabetes Mellitus              | 3138 (0.3%)   | 3006 (0.3%)   |



| Vaccination - Seizures                | 1, N = 913091 | 0, N = 913091 |
|---------------------------------------|---------------|---------------|
| Age                                   | 38 (27, 54)   | 38 (27, 54)   |
| Age Groups                            |               |               |
| 16-39                                 | 476943 (52%)  | 476943 (52%)  |
| 40-49                                 | 165220 (18%)  | 165220 (18%)  |
| 50-59                                 | 97485 (11%)   | 97485 (11%)   |
| 60-69                                 | 93223 (10%)   | 93223 (10%)   |
| 70-79                                 | 56971 (6.2%)  | 56971 (6.2%)  |
| 80+                                   | 23249 (2.5%)  | 23249 (2.5%)  |
| Sex                                   |               |               |
| F                                     | 441879 (48%)  | 441879 (48%)  |
| M                                     | 471212 (52%)  | 471212 (52%)  |
| Population Sector                     |               |               |
| General Jewish                        | 617140 (68%)  | 617140 (68%)  |
| Arab                                  | 270936 (30%)  | 270936 (30%)  |
| Ultra-Orthodox Jewish                 | 25015 (2.7%)  | 25015 (2.7%)  |
| CDC Risk Factor Count                 |               |               |
| 0                                     | 586030 (64%)  | 586030 (64%)  |
| 1                                     | 204412 (22%)  | 204412 (22%)  |
| 2                                     | 65124 (7.1%)  | 65124 (7.1%)  |
| 3                                     | 30086 (3.3%)  | 30086 (3.3%)  |
| 4+                                    | 27439 (3.0%)  | 27439 (3.0%)  |
| Flu Vaccinations in the Last 5 Years  |               |               |
| 0                                     | 574358 (63%)  | 640233 (70%)  |
| 1-2                                   | 177039 (19%)  | 152738 (17%)  |
| 3-4                                   | 78044 (8.5%)  | 64348 (7.0%)  |
| 5+                                    | 83650 (9.2%)  | 55772 (6.1%)  |
| Cancer                                | 10927 (1.2%)  | 11357 (1.2%)  |
| CDC "Certain" Risk Criteria           |               |               |
| Chronic Kidney Disease                | 43975 (4.8%)  | 44528 (4.9%)  |
| Chronic Obstructive Pulmonary Disease | 11279 (1.2%)  | 12796 (1.4%)  |
| Heart Disease                         | 37111 (4.1%)  | 36893 (4.0%)  |
| Solid Organ Transplant                | 417 (<0.1%)   | 444 (<0.1%)   |
| Obesity (BMI 30-40)                   | 136051 (15%)  | 132096 (14%)  |
| Severe Obesity (BMI 40+)              | 12485 (1.4%)  | 13292 (1.5%)  |
| Pregnancy                             | 6317 (0.7%)   | 6317 (0.7%)   |
| Sickle Cell Disease                   | 143 (<0.1%)   | 190 (<0.1%)   |
| Smoking                               | 161992 (18%)  | 192664 (21%)  |
| Type 2 Diabetes Mellitus              | 68394 (7.5%)  | 67624 (7.4%)  |
| Asthma                                | 48315 (5.3%)  | 48675 (5.3%)  |
| CDC "Possible" Risk Criteria          |               |               |
| Cerebrovascular Disease               | 16376 (1.8%)  | 17042 (1.9%)  |
| Other Respiratory Disease             | 2096 (0.2%)   | 2199 (0.2%)   |
| Hypertension                          | 105066 (12%)  | 103536 (11%)  |
| Immunosuppression                     | 16894 (1.9%)  | 16976 (1.9%)  |
| Neurological Disease                  | 21890 (2.4%)  | 23484 (2.6%)  |
| Liver Disease                         | 11322 (1.2%)  | 13476 (1.5%)  |
| Overweight (BMI 25-30)                | 295668 (32%)  | 281783 (31%)  |
| Thalassemia                           | 6157 (0.7%)   | 5933 (0.6%)   |
| Type 1 Diabetes Mellitus              | 2980 (0.3%)   | 2846 (0.3%)   |

| Vaccination - Syncope                 | 1, N = 858068 | 0, N = 858068 |
|---------------------------------------|---------------|---------------|
| Age                                   | 38 (27, 53)   | 38 (27, 53)   |
| Age Groups                            |               |               |
| 16-39                                 | 453541 (53%)  | 453541 (53%)  |
| 40-49                                 | 157376 (18%)  | 157376 (18%)  |
| 50-59                                 | 91999 (11%)   | 91999 (11%)   |
| 60-69                                 | 86147 (10%)   | 86147 (10%)   |
| 70-79                                 | 50677 (5.9%)  | 50677 (5.9%)  |
| 80+                                   | 18328 (2.1%)  | 18328 (2.1%)  |
| Sex                                   |               |               |
| F                                     | 406746 (47%)  | 406746 (47%)  |
| M                                     | 451322 (53%)  | 451322 (53%)  |
| Population Sector                     |               |               |
| General Jewish                        | 574581 (67%)  | 574581 (67%)  |
| Arab                                  | 259640 (30%)  | 259640 (30%)  |
| Ultra-Orthodox Jewish                 | 23847 (2.8%)  | 23847 (2.8%)  |
| CDC Risk Factor Count                 |               |               |
| 0                                     | 554394 (65%)  | 554394 (65%)  |
| 1                                     | 194682 (23%)  | 194682 (23%)  |
| 2                                     | 60289 (7.0%)  | 60289 (7.0%)  |
| 3                                     | 26455 (3.1%)  | 26455 (3.1%)  |
| 4+                                    | 22248 (2.6%)  | 22248 (2.6%)  |
| Flu Vaccinations in the Last 5 Years  |               |               |
| 0                                     | 547245 (64%)  | 609510 (71%)  |
| 1-2                                   | 165485 (19%)  | 141497 (16%)  |
| 3-4                                   | 71314 (8.3%)  | 58279 (6.8%)  |
| 5+                                    | 74024 (8.6%)  | 48782 (5.7%)  |
| Cancer                                | 9583 (1.1%)   | 9964 (1.2%)   |
| CDC "Certain" Risk Criteria           |               |               |
| Chronic Kidney Disease                | 38327 (4.5%)  | 38648 (4.5%)  |
| Chronic Obstructive Pulmonary Disease | 9602 (1.1%)   | 10926 (1.3%)  |
| Heart Disease                         | 30654 (3.6%)  | 30342 (3.5%)  |
| Solid Organ Transplant                | 363 (<0.1%)   | 363 (<0.1%)   |
| Obesity (BMI 30-40)                   | 126598 (15%)  | 122610 (14%)  |
| Severe Obesity (BMI 40+)              | 11667 (1.4%)  | 12407 (1.4%)  |
| Pregnancy                             | 5598 (0.7%)   | 5598 (0.7%)   |
| Sickle Cell Disease                   | 140 (<0.1%)   | 183 (<0.1%)   |
| Smoking                               | 152171 (18%)  | 181110 (21%)  |
| Type 2 Diabetes Mellitus              | 60661 (7.1%)  | 60028 (7.0%)  |
| Asthma                                | 44683 (5.2%)  | 45164 (5.3%)  |
| CDC "Possible" Risk Criteria          |               |               |
| Cerebrovascular Disease               | 13430 (1.6%)  | 14071 (1.6%)  |
| Other Respiratory Disease             | 1783 (0.2%)   | 1856 (0.2%)   |
| Hypertension                          | 91884 (11%)   | 90528 (11%)   |
| Immunosuppression                     | 15023 (1.8%)  | 14979 (1.7%)  |
| Neurological Disease                  | 24179 (2.8%)  | 26090 (3.0%)  |
| Liver Disease                         | 10044 (1.2%)  | 11987 (1.4%)  |
| Overweight (BMI 25-30)                | 277528 (32%)  | 264270 (31%)  |
| Thalassemia                           | 5733 (0.7%)   | 5461 (0.6%)   |
| Type 1 Diabetes Mellitus              | 2673 (0.3%)   | 2520 (0.3%)   |

| Vaccination - Thrombocytopenia        | 1, N = 923123 | 0, N = 923123 |
|---------------------------------------|---------------|---------------|
| Age                                   | 38 (27, 54)   | 38 (27, 54)   |
| Age Groups                            |               |               |
| 16-39                                 | 483368 (52%)  | 483368 (52%)  |
| 40-49                                 | 166322 (18%)  | 166322 (18%)  |
| 50-59                                 | 98576 (11%)   | 98576 (11%)   |
| 60-69                                 | 94225 (10%)   | 94225 (10%)   |
| 70-79                                 | 57236 (6.2%)  | 57236 (6.2%)  |
| 80+                                   | 23396 (2.5%)  | 23396 (2.5%)  |
| Sex                                   |               |               |
| F                                     | 445726 (48%)  | 445726 (48%)  |
| M                                     | 477397 (52%)  | 477397 (52%)  |
| Population Sector                     |               |               |
| General Jewish                        | 623850 (68%)  | 623850 (68%)  |
| Arab                                  | 274374 (30%)  | 274374 (30%)  |
| Ultra-Orthodox Jewish                 | 24899 (2.7%)  | 24899 (2.7%)  |
| CDC Risk Factor Count                 |               |               |
| 0                                     | 586776 (64%)  | 586776 (64%)  |
| 1                                     | 210136 (23%)  | 210136 (23%)  |
| 2                                     | 67292 (7.3%)  | 67292 (7.3%)  |
| 3                                     | 30730 (3.3%)  | 30730 (3.3%)  |
| 4+                                    | 28189 (3.1%)  | 28189 (3.1%)  |
| Flu Vaccinations in the Last 5 Years  |               |               |
| 0                                     | 580394 (63%)  | 647222 (70%)  |
| 1-2                                   | 178763 (19%)  | 154169 (17%)  |
| 3-4                                   | 79216 (8.6%)  | 65358 (7.1%)  |
| 5+                                    | 84750 (9.2%)  | 56374 (6.1%)  |
| Cancer                                | 10945 (1.2%)  | 11303 (1.2%)  |
| CDC "Certain" Risk Criteria           |               |               |
| Chronic Kidney Disease                | 44257 (4.8%)  | 44830 (4.9%)  |
| Chronic Obstructive Pulmonary Disease | 11496 (1.2%)  | 13078 (1.4%)  |
| Heart Disease                         | 37328 (4.0%)  | 37076 (4.0%)  |
| Solid Organ Transplant                | 385 (<0.1%)   | 416 (<0.1%)   |
| Obesity (BMI 30-40)                   | 138390 (15%)  | 134082 (15%)  |
| Severe Obesity (BMI 40+)              | 12840 (1.4%)  | 13607 (1.5%)  |
| Pregnancy                             | 6275 (0.7%)   | 6275 (0.7%)   |
| Sickle Cell Disease                   | 152 (<0.1%)   | 192 (<0.1%)   |
| Smoking                               | 164244 (18%)  | 195370 (21%)  |
| Type 2 Diabetes Mellitus              | 69266 (7.5%)  | 68354 (7.4%)  |
| Asthma                                | 49613 (5.4%)  | 50056 (5.4%)  |
| CDC "Possible" Risk Criteria          |               |               |
| Cerebrovascular Disease               | 17313 (1.9%)  | 18036 (2.0%)  |
| Other Respiratory Disease             | 2121 (0.2%)   | 2183 (0.2%)   |
| Hypertension                          | 106305 (12%)  | 104675 (11%)  |
| Immunosuppression                     | 16950 (1.8%)  | 16971 (1.8%)  |
| Neurological Disease                  | 29626 (3.2%)  | 31978 (3.5%)  |
| Liver Disease                         | 11128 (1.2%)  | 13270 (1.4%)  |
| Overweight (BMI 25-30)                | 298216 (32%)  | 284113 (31%)  |
| Thalassemia                           | 6217 (0.7%)   | 5951 (0.6%)   |
| Type 1 Diabetes Mellitus              | 3083 (0.3%)   | 2918 (0.3%)   |

| Vaccination - Uveitis                 | 1, N = 933217 | 0, N = 933217 |
|---------------------------------------|---------------|---------------|
| Age                                   | 38 (27, 54)   | 38 (27, 54)   |
| Age Groups                            |               |               |
| 16-39                                 | 488615 (52%)  | 488615 (52%)  |
| 40-49                                 | 168043 (18%)  | 168043 (18%)  |
| 50-59                                 | 99219 (11%)   | 99219 (11%)   |
| 60-69                                 | 95051 (10%)   | 95051 (10%)   |
| 70-79                                 | 58296 (6.2%)  | 58296 (6.2%)  |
| 80+                                   | 23993 (2.6%)  | 23993 (2.6%)  |
| Sex                                   |               |               |
| F                                     | 451728 (48%)  | 451728 (48%)  |
| M                                     | 481489 (52%)  | 481489 (52%)  |
| Population Sector                     |               |               |
| General Jewish                        | 631522 (68%)  | 631522 (68%)  |
| Arab                                  | 276283 (30%)  | 276283 (30%)  |
| Ultra-Orthodox Jewish                 | 25412 (2.7%)  | 25412 (2.7%)  |
| CDC Risk Factor Count                 |               |               |
| 0                                     | 592032 (63%)  | 592032 (63%)  |
| 1                                     | 212436 (23%)  | 212436 (23%)  |
| 2                                     | 68210 (7.3%)  | 68210 (7.3%)  |
| 3                                     | 31329 (3.4%)  | 31329 (3.4%)  |
| 4+                                    | 29210 (3.1%)  | 29210 (3.1%)  |
| Flu Vaccinations in the Last 5 Years  |               |               |
| 0                                     | 584904 (63%)  | 652314 (70%)  |
| 1-2                                   | 181332 (19%)  | 156669 (17%)  |
| 3-4                                   | 80494 (8.6%)  | 66557 (7.1%)  |
| 5+                                    | 86487 (9.3%)  | 57677 (6.2%)  |
| Cancer                                | 11369 (1.2%)  | 11766 (1.3%)  |
| CDC "Certain" Risk Criteria           |               |               |
| Chronic Kidney Disease                | 45466 (4.9%)  | 45944 (4.9%)  |
| Chronic Obstructive Pulmonary Disease | 11792 (1.3%)  | 13409 (1.4%)  |
| Heart Disease                         | 38539 (4.1%)  | 38282 (4.1%)  |
| Solid Organ Transplant                | 447 (<0.1%)   | 463 (<0.1%)   |
| Obesity (BMI 30-40)                   | 139875 (15%)  | 135450 (15%)  |
| Severe Obesity (BMI 40+)              | 12956 (1.4%)  | 13745 (1.5%)  |
| Pregnancy                             | 6457 (0.7%)   | 6457 (0.7%)   |
| Sickle Cell Disease                   | 149 (<0.1%)   | 198 (<0.1%)   |
| Smoking                               | 165459 (18%)  | 196747 (21%)  |
| Type 2 Diabetes Mellitus              | 70360 (7.5%)  | 69459 (7.4%)  |
| Asthma                                | 50368 (5.4%)  | 50700 (5.4%)  |
| CDC "Possible" Risk Criteria          |               |               |
| Cerebrovascular Disease               | 17765 (1.9%)  | 18538 (2.0%)  |
| Other Respiratory Disease             | 2175 (0.2%)   | 2264 (0.2%)   |
| Hypertension                          | 108220 (12%)  | 106547 (11%)  |
| Immunosuppression                     | 17343 (1.9%)  | 17382 (1.9%)  |
| Neurological Disease                  | 30310 (3.2%)  | 32648 (3.5%)  |
| Liver Disease                         | 11788 (1.3%)  | 14075 (1.5%)  |
| Overweight (BMI 25-30)                | 301268 (32%)  | 287201 (31%)  |
| Thalassemia                           | 6396 (0.7%)   | 6128 (0.7%)   |
| Type 1 Diabetes Mellitus              | 3119 (0.3%)   | 2984 (0.3%)   |

| Vaccination - Vertigo                 | 1, N = 773263 | 0, N = 773263 |
|---------------------------------------|---------------|---------------|
| Age                                   | 36 (26, 49)   | 36 (26, 49)   |
| Age Groups                            |               |               |
| 16-39                                 | 447099 (58%)  | 447099 (58%)  |
| 40-49                                 | 139747 (18%)  | 139747 (18%)  |
| 50-59                                 | 75081 (9.7%)  | 75081 (9.7%)  |
| 60-69                                 | 64602 (8.4%)  | 64602 (8.4%)  |
| 70-79                                 | 35385 (4.6%)  | 35385 (4.6%)  |
| 80+                                   | 11349 (1.5%)  | 11349 (1.5%)  |
| Sex                                   |               |               |
| F                                     | 348565 (45%)  | 348565 (45%)  |
| M                                     | 424698 (55%)  | 424698 (55%)  |
| Population Sector                     |               |               |
| General Jewish                        | 516989 (67%)  | 516989 (67%)  |
| Arab                                  | 233865 (30%)  | 233865 (30%)  |
| Ultra-Orthodox Jewish                 | 22409 (2.9%)  | 22409 (2.9%)  |
| CDC Risk Factor Count                 |               |               |
| 0                                     | 525850 (68%)  | 525850 (68%)  |
| 1                                     | 170890 (22%)  | 170890 (22%)  |
| 2                                     | 45210 (5.8%)  | 45210 (5.8%)  |
| 3                                     | 17697 (2.3%)  | 17697 (2.3%)  |
| 4+                                    | 13616 (1.8%)  | 13616 (1.8%)  |
| Flu Vaccinations in the Last 5 Years  |               |               |
| 0                                     | 516687 (67%)  | 573358 (74%)  |
| 1-2                                   | 147264 (19%)  | 122450 (16%)  |
| 3-4                                   | 56931 (7.4%)  | 44261 (5.7%)  |
| 5+                                    | 52381 (6.8%)  | 33194 (4.3%)  |
| Cancer                                | 7169 (0.9%)   | 7358 (1.0%)   |
| CDC "Certain" Risk Criteria           |               |               |
| Chronic Kidney Disease                | 29415 (3.8%)  | 29842 (3.9%)  |
| Chronic Obstructive Pulmonary Disease | 6724 (0.9%)   | 7692 (1.0%)   |
| Heart Disease                         | 21707 (2.8%)  | 21519 (2.8%)  |
| Solid Organ Transplant                | 254 (<0.1%)   | 276 (<0.1%)   |
| Obesity (BMI 30-40)                   | 101722 (13%)  | 98495 (13%)   |
| Severe Obesity (BMI 40+)              | 9199 (1.2%)   | 9621 (1.2%)   |
| Pregnancy                             | 5389 (0.7%)   | 5389 (0.7%)   |
| Sickle Cell Disease                   | 119 (<0.1%)   | 170 (<0.1%)   |
| Smoking                               | 140265 (18%)  | 167684 (22%)  |
| Type 2 Diabetes Mellitus              | 42663 (5.5%)  | 42062 (5.4%)  |
| Asthma                                | 40011 (5.2%)  | 40198 (5.2%)  |
| CDC "Possible" Risk Criteria          |               |               |
| Cerebrovascular Disease               | 8332 (1.1%)   | 8836 (1.1%)   |
| Other Respiratory Disease             | 1263 (0.2%)   | 1332 (0.2%)   |
| Hypertension                          | 63902 (8.3%)  | 62734 (8.1%)  |
| Immunosuppression                     | 11027 (1.4%)  | 10966 (1.4%)  |
| Neurological Disease                  | 18202 (2.4%)  | 19873 (2.6%)  |
| Liver Disease                         | 7875 (1.0%)   | 9548 (1.2%)   |
| Overweight (BMI 25-30)                | 243150 (31%)  | 230441 (30%)  |
| Thalassemia                           | 5019 (0.6%)   | 4891 (0.6%)   |
| Type 1 Diabetes Mellitus              | 2227 (0.3%)   | 2058 (0.3%)   |

| Vaccination - Herpes Zoster           | 1, N = 888647 | 0, N = 888647 |
|---------------------------------------|---------------|---------------|
| Age                                   | 38 (27, 52)   | 38 (27, 52)   |
| Age Groups                            |               |               |
| 16-39                                 | 477001 (54%)  | 477001 (54%)  |
| 40-49                                 | 162170 (18%)  | 162170 (18%)  |
| 50-59                                 | 94176 (11%)   | 94176 (11%)   |
| 60-69                                 | 85875 (9.7%)  | 85875 (9.7%)  |
| 70-79                                 | 50070 (5.6%)  | 50070 (5.6%)  |
| 80+                                   | 19355 (2.2%)  | 19355 (2.2%)  |
| Sex                                   |               |               |
| F                                     | 426598 (48%)  | 426598 (48%)  |
| M                                     | 462049 (52%)  | 462049 (52%)  |
| Population Sector                     |               |               |
| General Jewish                        | 594530 (67%)  | 594530 (67%)  |
| Arab                                  | 269802 (30%)  | 269802 (30%)  |
| Ultra-Orthodox Jewish                 | 24315 (2.7%)  | 24315 (2.7%)  |
| CDC Risk Factor Count                 |               |               |
| 0                                     | 573238 (65%)  | 573238 (65%)  |
| 1                                     | 201844 (23%)  | 201844 (23%)  |
| 2                                     | 61642 (6.9%)  | 61642 (6.9%)  |
| 3                                     | 27310 (3.1%)  | 27310 (3.1%)  |
| 4+                                    | 24613 (2.8%)  | 24613 (2.8%)  |
| Flu Vaccinations in the Last 5 Years  |               |               |
| 0                                     | 568074 (64%)  | 632456 (71%)  |
| 1-2                                   | 171770 (19%)  | 147001 (17%)  |
| 3-4                                   | 73506 (8.3%)  | 59755 (6.7%)  |
| 5+                                    | 75297 (8.5%)  | 49435 (5.6%)  |
| Cancer                                | 9969 (1.1%)   | 10321 (1.2%)  |
| CDC "Certain" Risk Criteria           |               |               |
| Chronic Kidney Disease                | 40759 (4.6%)  | 41375 (4.7%)  |
| Chronic Obstructive Pulmonary Disease | 10226 (1.2%)  | 11638 (1.3%)  |
| Heart Disease                         | 33316 (3.7%)  | 32970 (3.7%)  |
| Solid Organ Transplant                | 354 (<0.1%)   | 366 (<0.1%)   |
| Obesity (BMI 30-40)                   | 130412 (15%)  | 126405 (14%)  |
| Severe Obesity (BMI 40+)              | 12157 (1.4%)  | 12894 (1.5%)  |
| Pregnancy                             | 6226 (0.7%)   | 6226 (0.7%)   |
| Sickle Cell Disease                   | 147 (<0.1%)   | 190 (<0.1%)   |
| Smoking                               | 158931 (18%)  | 189146 (21%)  |
| Type 2 Diabetes Mellitus              | 62134 (7.0%)  | 61453 (6.9%)  |
| Asthma                                | 47264 (5.3%)  | 47463 (5.3%)  |
| CDC "Possible" Risk Criteria          |               |               |
| Cerebrovascular Disease               | 15274 (1.7%)  | 16039 (1.8%)  |
| Other Respiratory Disease             | 1842 (0.2%)   | 1889 (0.2%)   |
| Hypertension                          | 94622 (11%)   | 93087 (10%)   |
| Immunosuppression                     | 15463 (1.7%)  | 15499 (1.7%)  |
| Neurological Disease                  | 27146 (3.1%)  | 29295 (3.3%)  |
| Liver Disease                         | 10847 (1.2%)  | 12835 (1.4%)  |
| Overweight (BMI 25-30)                | 284989 (32%)  | 271415 (31%)  |
| Thalassemia                           | 6158 (0.7%)   | 5925 (0.7%)   |
| Type 1 Diabetes Mellitus              | 2883 (0.3%)   | 2723 (0.3%)   |

## Table S5 – Outcome specific population tables for the SARS-CoV-2 exposure analyses

Characteristics of the different study populations for each study outcome following application of all eligibility criteria, the matching process and exclusion of patients with the outcome diagnosed before start of follow-up. CDC: Centers for Disease Control and Prevention; BMI: Body mass index.

| SARS-CoV-2 - Acute Kidney Injury      | 1, N = 179018 | 0, N = 179018 |
|---------------------------------------|---------------|---------------|
| Age                                   | 34 (24, 47)   | 34 (24, 47)   |
| Age Groups                            |               |               |
| 16-39                                 | 111116 (62%)  | 111116 (62%)  |
| 40-49                                 | 30233 (17%)   | 30233 (17%)   |
| 50-59                                 | 18845 (11%)   | 18845 (11%)   |
| 60-69                                 | 12341 (6.9%)  | 12341 (6.9%)  |
| 70-79                                 | 4939 (2.8%)   | 4939 (2.8%)   |
| 80+                                   | 1544 (0.9%)   | 1544 (0.9%)   |
| Sex                                   |               |               |
| F                                     | 98114 (55%)   | 98114 (55%)   |
| M                                     | 80904 (45%)   | 80904 (45%)   |
| Population Sector                     |               |               |
| General Jewish                        | 93914 (52%)   | 93914 (52%)   |
| Arab                                  | 63570 (36%)   | 63570 (36%)   |
| Ultra-Orthodox Jewish                 | 21534 (12%)   | 21534 (12%)   |
| CDC Risk Factor Count                 |               |               |
| 0                                     | 113293 (63%)  | 113293 (63%)  |
| 1                                     | 43697 (24%)   | 43697 (24%)   |
| 2                                     | 12677 (7.1%)  | 12677 (7.1%)  |
| 3                                     | 5177 (2.9%)   | 5177 (2.9%)   |
| 4+                                    | 4174 (2.3%)   | 4174 (2.3%)   |
| Flu Vaccinations in the Last 5 Years  |               |               |
| 0                                     | 126597 (71%)  | 127468 (71%)  |
| 1-2                                   | 30961 (17%)   | 30710 (17%)   |
| 3-4                                   | 12222 (6.8%)  | 11907 (6.7%)  |
| 5+                                    | 9238 (5.2%)   | 8933 (5.0%)   |
| Cancer                                | 1956 (1.1%)   | 2256 (1.3%)   |
| CDC "Certain" Risk Criteria           |               |               |
| Chronic Kidney Disease                | 6608 (3.7%)   | 6618 (3.7%)   |
| Chronic Obstructive Pulmonary Disease | 1551 (0.9%)   | 2039 (1.1%)   |
| Heart Disease                         | 4813 (2.7%)   | 5169 (2.9%)   |
| Solid Organ Transplant                | 29 (<0.1%)    | 27 (<0.1%)    |
| Obesity (BMI 30-40)                   | 31521 (18%)   | 29430 (16%)   |
| Severe Obesity (BMI 40+)              | 3570 (2.0%)   | 3184 (1.8%)   |
| Pregnancy                             | 5251 (2.9%)   | 5251 (2.9%)   |
| Sickle Cell Disease                   | 51 (<0.1%)    | 58 (<0.1%)    |
| Smoking                               | 19432 (11%)   | 31337 (18%)   |
| Type 2 Diabetes Mellitus              | 11799 (6.6%)  | 11760 (6.6%)  |
| Asthma                                | 10465 (5.8%)  | 10707 (6.0%)  |
| CDC "Possible" Risk Criteria          |               |               |
| Cerebrovascular Disease               | 2437 (1.4%)   | 2520 (1.4%)   |
| Other Respiratory Disease             | 303 (0.2%)    | 362 (0.2%)    |
| Hypertension                          | 14511 (8.1%)  | 14652 (8.2%)  |
| Immunosuppression                     | 4321 (2.4%)   | 4456 (2.5%)   |
| Neurological Disease                  | 5308 (3.0%)   | 5568 (3.1%)   |
| Liver Disease                         | 2333 (1.3%)   | 2570 (1.4%)   |
| Overweight (BMI 25-30)                | 55088 (31%)   | 51648 (29%)   |
| Thalassemia                           | 1710 (1.0%)   | 1709 (1.0%)   |
| Type 1 Diabetes Mellitus              | 628 (0.4%)    | 707 (0.4%)    |

| SARS-CoV-2 - Anemia                   | 1, N = 131963 | 0, N = 131963 |
|---------------------------------------|---------------|---------------|
| Age                                   | 34 (24, 46)   | 34 (24, 46)   |
| Age Groups                            |               |               |
| 16-39                                 | 82736 (63%)   | 82736 (63%)   |
| 40-49                                 | 22117 (17%)   | 22117 (17%)   |
| 50-59                                 | 13226 (10%)   | 13226 (10%)   |
| 60-69                                 | 9195 (7.0%)   | 9195 (7.0%)   |
| 70-79                                 | 3714 (2.8%)   | 3714 (2.8%)   |
| 80+                                   | 975 (0.7%)    | 975 (0.7%)    |
| Sex                                   |               |               |
| F                                     | 60843 (46%)   | 60843 (46%)   |
| M                                     | 71120 (54%)   | 71120 (54%)   |
| Population Sector                     |               |               |
| General Jewish                        | 69989 (53%)   | 69989 (53%)   |
| Arab                                  | 45951 (35%)   | 45951 (35%)   |
| Ultra-Orthodox Jewish                 | 16023 (12%)   | 16023 (12%)   |
| CDC Risk Factor Count                 |               |               |
| 0                                     | 86658 (66%)   | 86658 (66%)   |
| 1                                     | 30789 (23%)   | 30789 (23%)   |
| 2                                     | 8355 (6.3%)   | 8355 (6.3%)   |
| 3                                     | 3376 (2.6%)   | 3376 (2.6%)   |
| 4+                                    | 2785 (2.1%)   | 2785 (2.1%)   |
| Flu Vaccinations in the Last 5 Years  |               |               |
| 0                                     | 95844 (73%)   | 96705 (73%)   |
| 1-2                                   | 21604 (16%)   | 21253 (16%)   |
| 3-4                                   | 8313 (6.3%)   | 8039 (6.1%)   |
| 5+                                    | 6202 (4.7%)   | 5966 (4.5%)   |
| Cancer                                | 1143 (0.9%)   | 1290 (1.0%)   |
| CDC "Certain" Risk Criteria           |               |               |
| Chronic Kidney Disease                | 5136 (3.9%)   | 5137 (3.9%)   |
| Chronic Obstructive Pulmonary Disease | 1089 (0.8%)   | 1437 (1.1%)   |
| Heart Disease                         | 3426 (2.6%)   | 3744 (2.8%)   |
| Solid Organ Transplant                | 35 (<0.1%)    | 38 (<0.1%)    |
| Obesity (BMI 30-40)                   | 21994 (17%)   | 20409 (15%)   |
| Severe Obesity (BMI 40+)              | 2235 (1.7%)   | 2040 (1.5%)   |
| Pregnancy                             | 2982 (2.3%)   | 2982 (2.3%)   |
| Sickle Cell Disease                   | 15 (<0.1%)    | 14 (<0.1%)    |
| Smoking                               | 16346 (12%)   | 26361 (20%)   |
| Type 2 Diabetes Mellitus              | 8085 (6.1%)   | 8088 (6.1%)   |
| Asthma                                | 7018 (5.3%)   | 7231 (5.5%)   |
| CDC "Possible" Risk Criteria          |               |               |
| Cerebrovascular Disease               | 1606 (1.2%)   | 1668 (1.3%)   |
| Other Respiratory Disease             | 170 (0.1%)    | 198 (0.2%)    |
| Hypertension                          | 10204 (7.7%)  | 10422 (7.9%)  |
| Immunosuppression                     | 2641 (2.0%)   | 2707 (2.1%)   |
| Neurological Disease                  | 3488 (2.6%)   | 3574 (2.7%)   |
| Liver Disease                         | 1507 (1.1%)   | 1655 (1.3%)   |
| Overweight (BMI 25-30)                | 42141 (32%)   | 39356 (30%)   |
| Thalassemia                           | 377 (0.3%)    | 384 (0.3%)    |
| Type 1 Diabetes Mellitus              | 409 (0.3%)    | 491 (0.4%)    |



| SARS-CoV-2 - Appendicitis             | 1, N = 176252 | 0, N = 176252 |
|---------------------------------------|---------------|---------------|
| Age                                   | 35 (25, 48)   | 35 (25, 48)   |
| Age Groups                            |               |               |
| 16-39                                 | 106748 (61%)  | 106748 (61%)  |
| 40-49                                 | 29205 (17%)   | 29205 (17%)   |
| 50-59                                 | 18691 (11%)   | 18691 (11%)   |
| 60-69                                 | 13083 (7.4%)  | 13083 (7.4%)  |
| 70-79                                 | 6133 (3.5%)   | 6133 (3.5%)   |
| 80+                                   | 2392 (1.4%)   | 2392 (1.4%)   |
| Sex                                   |               |               |
| F                                     | 95992 (54%)   | 95992 (54%)   |
| M                                     | 80260 (46%)   | 80260 (46%)   |
| Population Sector                     |               |               |
| General Jewish                        | 92942 (53%)   | 92942 (53%)   |
| Arab                                  | 62219 (35%)   | 62219 (35%)   |
| Ultra-Orthodox Jewish                 | 21091 (12%)   | 21091 (12%)   |
| CDC Risk Factor Count                 |               |               |
| 0                                     | 109158 (62%)  | 109158 (62%)  |
| 1                                     | 42194 (24%)   | 42194 (24%)   |
| 2                                     | 12619 (7.2%)  | 12619 (7.2%)  |
| 3                                     | 5732 (3.3%)   | 5732 (3.3%)   |
| 4+                                    | 6549 (3.7%)   | 6549 (3.7%)   |
| Flu Vaccinations in the Last 5 Years  |               |               |
| 0                                     | 122056 (69%)  | 122855 (70%)  |
| 1-2                                   | 30458 (17%)   | 30229 (17%)   |
| 3-4                                   | 12896 (7.3%)  | 12663 (7.2%)  |
| 5+                                    | 10842 (6.2%)  | 10505 (6.0%)  |
| Cancer                                | 2236 (1.3%)   | 2532 (1.4%)   |
| CDC "Certain" Risk Criteria           |               |               |
| Chronic Kidney Disease                | 9002 (5.1%)   | 8825 (5.0%)   |
| Chronic Obstructive Pulmonary Disease | 2055 (1.2%)   | 2488 (1.4%)   |
| Heart Disease                         | 6688 (3.8%)   | 6958 (3.9%)   |
| Solid Organ Transplant                | 177 (0.1%)    | 159 (<0.1%)   |
| Obesity (BMI 30-40)                   | 31890 (18%)   | 29748 (17%)   |
| Severe Obesity (BMI 40+)              | 3677 (2.1%)   | 3256 (1.8%)   |
| Pregnancy                             | 5021 (2.8%)   | 5021 (2.8%)   |
| Sickle Cell Disease                   | 53 (<0.1%)    | 61 (<0.1%)    |
| Smoking                               | 19015 (11%)   | 30542 (17%)   |
| Type 2 Diabetes Mellitus              | 13792 (7.8%)  | 13703 (7.8%)  |
| Asthma                                | 10346 (5.9%)  | 10745 (6.1%)  |
| CDC "Possible" Risk Criteria          |               |               |
| Cerebrovascular Disease               | 3223 (1.8%)   | 3337 (1.9%)   |
| Other Respiratory Disease             | 364 (0.2%)    | 411 (0.2%)    |
| Hypertension                          | 17328 (9.8%)  | 17470 (9.9%)  |
| Immunosuppression                     | 4736 (2.7%)   | 4823 (2.7%)   |
| Neurological Disease                  | 5710 (3.2%)   | 5990 (3.4%)   |
| Liver Disease                         | 2575 (1.5%)   | 2763 (1.6%)   |
| Overweight (BMI 25-30)                | 54518 (31%)   | 51111 (29%)   |
| Thalassemia                           | 1668 (0.9%)   | 1660 (0.9%)   |
| Type 1 Diabetes Mellitus              | 748 (0.4%)    | 819 (0.5%)    |

| SARS-CoV-2 - Arrhythmia               | 1, N = 169220 | 0, N = 169220 |
|---------------------------------------|---------------|---------------|
| Age                                   | 34 (24, 46)   | 34 (24, 46)   |
| Age Groups                            |               |               |
| 16-39                                 | 107307 (63%)  | 107307 (63%)  |
| 40-49                                 | 28603 (17%)   | 28603 (17%)   |
| 50-59                                 | 17322 (10%)   | 17322 (10%)   |
| 60-69                                 | 10928 (6.5%)  | 10928 (6.5%)  |
| 70-79                                 | 3998 (2.4%)   | 3998 (2.4%)   |
| 80+                                   | 1062 (0.6%)   | 1062 (0.6%)   |
| Sex                                   |               |               |
| F                                     | 91821 (54%)   | 91821 (54%)   |
| M                                     | 77399 (46%)   | 77399 (46%)   |
| Population Sector                     |               |               |
| General Jewish                        | 88312 (52%)   | 88312 (52%)   |
| Arab                                  | 60363 (36%)   | 60363 (36%)   |
| Ultra-Orthodox Jewish                 | 20545 (12%)   | 20545 (12%)   |
| CDC Risk Factor Count                 |               |               |
| 0                                     | 109108 (64%)  | 109108 (64%)  |
| 1                                     | 41127 (24%)   | 41127 (24%)   |
| 2                                     | 11106 (6.6%)  | 11106 (6.6%)  |
| 3                                     | 4293 (2.5%)   | 4293 (2.5%)   |
| 4+                                    | 3586 (2.1%)   | 3586 (2.1%)   |
| Flu Vaccinations in the Last 5 Years  |               |               |
| 0                                     | 121603 (72%)  | 122325 (72%)  |
| 1-2                                   | 28932 (17%)   | 28695 (17%)   |
| 3-4                                   | 10753 (6.4%)  | 10621 (6.3%)  |
| 5+                                    | 7932 (4.7%)   | 7579 (4.5%)   |
| Cancer                                | 1703 (1.0%)   | 1955 (1.2%)   |
| CDC "Certain" Risk Criteria           |               |               |
| Chronic Kidney Disease                | 7020 (4.1%)   | 6958 (4.1%)   |
| Chronic Obstructive Pulmonary Disease | 1257 (0.7%)   | 1660 (1.0%)   |
| Heart Disease                         | 3567 (2.1%)   | 3724 (2.2%)   |
| Solid Organ Transplant                | 128 (<0.1%)   | 106 (<0.1%)   |
| Obesity (BMI 30-40)                   | 28883 (17%)   | 26918 (16%)   |
| Severe Obesity (BMI 40+)              | 3231 (1.9%)   | 2901 (1.7%)   |
| Pregnancy                             | 4982 (2.9%)   | 4982 (2.9%)   |
| Sickle Cell Disease                   | 46 (<0.1%)    | 54 (<0.1%)    |
| Smoking                               | 18546 (11%)   | 29775 (18%)   |
| Type 2 Diabetes Mellitus              | 10432 (6.2%)  | 10459 (6.2%)  |
| Asthma                                | 9644 (5.7%)   | 9930 (5.9%)   |
| CDC "Possible" Risk Criteria          |               |               |
| Cerebrovascular Disease               | 1964 (1.2%)   | 2067 (1.2%)   |
| Other Respiratory Disease             | 247 (0.1%)    | 283 (0.2%)    |
| Hypertension                          | 12238 (7.2%)  | 12334 (7.3%)  |
| Immunosuppression                     | 3889 (2.3%)   | 4070 (2.4%)   |
| Neurological Disease                  | 4588 (2.7%)   | 4916 (2.9%)   |
| Liver Disease                         | 2091 (1.2%)   | 2303 (1.4%)   |
| Overweight (BMI 25-30)                | 51887 (31%)   | 48644 (29%)   |
| Thalassemia                           | 1562 (0.9%)   | 1564 (0.9%)   |
| Type 1 Diabetes Mellitus              | 626 (0.4%)    | 687 (0.4%)    |

| SARS-CoV-2 - Arthritis or Arthropathy | 1, N = 146035 | 0, N = 146035 |
|---------------------------------------|---------------|---------------|
| Age                                   | 31 (23, 42)   | 31 (23, 42)   |
| Age Groups                            |               |               |
| 16-39                                 | 102447 (70%)  | 102447 (70%)  |
| 40-49                                 | 22741 (16%)   | 22741 (16%)   |
| 50-59                                 | 11408 (7.8%)  | 11408 (7.8%)  |
| 60-69                                 | 6345 (4.3%)   | 6345 (4.3%)   |
| 70-79                                 | 2386 (1.6%)   | 2386 (1.6%)   |
| 80+                                   | 708 (0.5%)    | 708 (0.5%)    |
| Sex                                   |               |               |
| F                                     | 78762 (54%)   | 78762 (54%)   |
| M                                     | 67273 (46%)   | 67273 (46%)   |
| Population Sector                     |               |               |
| General Jewish                        | 75581 (52%)   | 75581 (52%)   |
| Arab                                  | 50907 (35%)   | 50907 (35%)   |
| Ultra-Orthodox Jewish                 | 19547 (13%)   | 19547 (13%)   |
| CDC Risk Factor Count                 |               |               |
| 0                                     | 100540 (69%)  | 100540 (69%)  |
| 1                                     | 34013 (23%)   | 34013 (23%)   |
| 2                                     | 7277 (5.0%)   | 7277 (5.0%)   |
| 3                                     | 2254 (1.5%)   | 2254 (1.5%)   |
| 4+                                    | 1951 (1.3%)   | 1951 (1.3%)   |
| Flu Vaccinations in the Last 5 Years  |               |               |
| 0                                     | 109168 (75%)  | 109764 (75%)  |
| 1-2                                   | 24278 (17%)   | 24047 (16%)   |
| 3-4                                   | 7557 (5.2%)   | 7484 (5.1%)   |
| 5+                                    | 5032 (3.4%)   | 4740 (3.2%)   |
| Cancer                                | 1179 (0.8%)   | 1329 (0.9%)   |
| CDC "Certain" Risk Criteria           |               |               |
| Chronic Kidney Disease                | 4790 (3.3%)   | 4688 (3.2%)   |
| Chronic Obstructive Pulmonary Disease | 795 (0.5%)    | 971 (0.7%)    |
| Heart Disease                         | 2618 (1.8%)   | 2797 (1.9%)   |
| Solid Organ Transplant                | 83 (<0.1%)    | 86 (<0.1%)    |
| Obesity (BMI 30-40)                   | 21551 (15%)   | 20257 (14%)   |
| Severe Obesity (BMI 40+)              | 2210 (1.5%)   | 2009 (1.4%)   |
| Pregnancy                             | 4820 (3.3%)   | 4820 (3.3%)   |
| Sickle Cell Disease                   | 43 (<0.1%)    | 36 (<0.1%)    |
| Smoking                               | 15634 (11%)   | 24417 (17%)   |
| Type 2 Diabetes Mellitus              | 6165 (4.2%)   | 6107 (4.2%)   |
| Asthma                                | 8033 (5.5%)   | 8329 (5.7%)   |
| CDC "Possible" Risk Criteria          |               |               |
| Cerebrovascular Disease               | 1234 (0.8%)   | 1220 (0.8%)   |
| Other Respiratory Disease             | 162 (0.1%)    | 168 (0.1%)    |
| Hypertension                          | 7424 (5.1%)   | 7558 (5.2%)   |
| Immunosuppression                     | 2071 (1.4%)   | 2220 (1.5%)   |
| Neurological Disease                  | 3162 (2.2%)   | 3340 (2.3%)   |
| Liver Disease                         | 1360 (0.9%)   | 1518 (1.0%)   |
| Overweight (BMI 25-30)                | 43290 (30%)   | 40497 (28%)   |
| Thalassemia                           | 1264 (0.9%)   | 1318 (0.9%)   |
| Type 1 Diabetes Mellitus              | 463 (0.3%)    | 521 (0.4%)    |

| SARS-CoV-2 - Bell's Palsy             | 1, N = 180674 | 0, N = 180674 |
|---------------------------------------|---------------|---------------|
| Age                                   | 34 (24, 47)   | 34 (25, 47)   |
| Age Groups                            |               |               |
| 16-39                                 | 110176 (61%)  | 110176 (61%)  |
| 40-49                                 | 30023 (17%)   | 30023 (17%)   |
| 50-59                                 | 18922 (10%)   | 18922 (10%)   |
| 60-69                                 | 13121 (7.3%)  | 13121 (7.3%)  |
| 70-79                                 | 6066 (3.4%)   | 6066 (3.4%)   |
| 80+                                   | 2366 (1.3%)   | 2366 (1.3%)   |
| Sex                                   |               |               |
| F                                     | 98227 (54%)   | 98227 (54%)   |
| M                                     | 82447 (46%)   | 82447 (46%)   |
| Population Sector                     |               |               |
| General Jewish                        | 95349 (53%)   | 95349 (53%)   |
| Arab                                  | 63768 (35%)   | 63768 (35%)   |
| Ultra-Orthodox Jewish                 | 21557 (12%)   | 21557 (12%)   |
| CDC Risk Factor Count                 |               |               |
| 0                                     | 112397 (62%)  | 112397 (62%)  |
| 1                                     | 43269 (24%)   | 43269 (24%)   |
| 2                                     | 12855 (7.1%)  | 12855 (7.1%)  |
| 3                                     | 5728 (3.2%)   | 5728 (3.2%)   |
| 4+                                    | 6425 (3.6%)   | 6425 (3.6%)   |
| Flu Vaccinations in the Last 5 Years  |               |               |
| 0                                     | 125531 (69%)  | 126402 (70%)  |
| 1-2                                   | 31238 (17%)   | 30972 (17%)   |
| 3-4                                   | 13035 (7.2%)  | 12778 (7.1%)  |
| 5+                                    | 10870 (6.0%)  | 10522 (5.8%)  |
| Cancer                                | 2268 (1.3%)   | 2598 (1.4%)   |
| CDC "Certain" Risk Criteria           |               |               |
| Chronic Kidney Disease                | 9209 (5.1%)   | 9043 (5.0%)   |
| Chronic Obstructive Pulmonary Disease | 2066 (1.1%)   | 2522 (1.4%)   |
| Heart Disease                         | 6650 (3.7%)   | 6891 (3.8%)   |
| Solid Organ Transplant                | 177 (<0.1%)   | 160 (<0.1%)   |
| Obesity (BMI 30-40)                   | 32399 (18%)   | 30272 (17%)   |
| Severe Obesity (BMI 40+)              | 3723 (2.1%)   | 3306 (1.8%)   |
| Pregnancy                             | 5182 (2.9%)   | 5182 (2.9%)   |
| Sickle Cell Disease                   | 51 (<0.1%)    | 56 (<0.1%)    |
| Smoking                               | 19602 (11%)   | 31564 (17%)   |
| Type 2 Diabetes Mellitus              | 13654 (7.6%)  | 13603 (7.5%)  |
| Asthma                                | 10681 (5.9%)  | 10997 (6.1%)  |
| CDC "Possible" Risk Criteria          |               |               |
| Cerebrovascular Disease               | 3081 (1.7%)   | 3136 (1.7%)   |
| Other Respiratory Disease             | 370 (0.2%)    | 411 (0.2%)    |
| Hypertension                          | 17267 (9.6%)  | 17477 (9.7%)  |
| Immunosuppression                     | 4766 (2.6%)   | 4886 (2.7%)   |
| Neurological Disease                  | 5670 (3.1%)   | 5941 (3.3%)   |
| Liver Disease                         | 2643 (1.5%)   | 2850 (1.6%)   |
| Overweight (BMI 25-30)                | 55784 (31%)   | 52343 (29%)   |
| Thalassemia                           | 1723 (1.0%)   | 1714 (0.9%)   |
| Type 1 Diabetes Mellitus              | 759 (0.4%)    | 828 (0.5%)    |

| SARS-CoV-2 - Cerebrovascular Accident | 1, N = 180086 | 0, N = 180086 |
|---------------------------------------|---------------|---------------|
| Age                                   | 34 (24, 47)   | 34 (24, 47)   |
| Age Groups                            |               |               |
| 16-39                                 | 111345 (62%)  | 111345 (62%)  |
| 40-49                                 | 30351 (17%)   | 30351 (17%)   |
| 50-59                                 | 18880 (10%)   | 18880 (10%)   |
| 60-69                                 | 12493 (6.9%)  | 12493 (6.9%)  |
| 70-79                                 | 5244 (2.9%)   | 5244 (2.9%)   |
| 80+                                   | 1773 (1.0%)   | 1773 (1.0%)   |
| Sex                                   |               |               |
| F                                     | 98204 (55%)   | 98204 (55%)   |
| M                                     | 81882 (45%)   | 81882 (45%)   |
| Population Sector                     |               |               |
| General Jewish                        | 94483 (52%)   | 94483 (52%)   |
| Arab                                  | 64019 (36%)   | 64019 (36%)   |
| Ultra-Orthodox Jewish                 | 21584 (12%)   | 21584 (12%)   |
| CDC Risk Factor Count                 |               |               |
| 0                                     | 113467 (63%)  | 113467 (63%)  |
| 1                                     | 43917 (24%)   | 43917 (24%)   |
| 2                                     | 12717 (7.1%)  | 12717 (7.1%)  |
| 3                                     | 5355 (3.0%)   | 5355 (3.0%)   |
| 4+                                    | 4630 (2.6%)   | 4630 (2.6%)   |
| Flu Vaccinations in the Last 5 Years  |               |               |
| 0                                     | 126813 (70%)  | 127636 (71%)  |
| 1-2                                   | 31101 (17%)   | 30838 (17%)   |
| 3-4                                   | 12374 (6.9%)  | 12056 (6.7%)  |
| 5+                                    | 9798 (5.4%)   | 9556 (5.3%)   |
| Cancer                                | 2116 (1.2%)   | 2420 (1.3%)   |
| CDC "Certain" Risk Criteria           |               |               |
| Chronic Kidney Disease                | 8415 (4.7%)   | 8233 (4.6%)   |
| Chronic Obstructive Pulmonary Disease | 1697 (0.9%)   | 2167 (1.2%)   |
| Heart Disease                         | 5424 (3.0%)   | 5750 (3.2%)   |
| Solid Organ Transplant                | 165 (<0.1%)   | 148 (<0.1%)   |
| Obesity (BMI 30-40)                   | 31870 (18%)   | 29894 (17%)   |
| Severe Obesity (BMI 40+)              | 3653 (2.0%)   | 3276 (1.8%)   |
| Pregnancy                             | 5264 (2.9%)   | 5264 (2.9%)   |
| Sickle Cell Disease                   | 52 (<0.1%)    | 58 (<0.1%)    |
| Smoking                               | 19519 (11%)   | 31415 (17%)   |
| Type 2 Diabetes Mellitus              | 12423 (6.9%)  | 12343 (6.9%)  |
| Asthma                                | 10492 (5.8%)  | 10923 (6.1%)  |
| CDC "Possible" Risk Criteria          |               |               |
| Cerebrovascular Disease               | 686 (0.4%)    | 617 (0.3%)    |
| Other Respiratory Disease             | 318 (0.2%)    | 365 (0.2%)    |
| Hypertension                          | 15316 (8.5%)  | 15555 (8.6%)  |
| Immunosuppression                     | 4597 (2.6%)   | 4782 (2.7%)   |
| Neurological Disease                  | 5080 (2.8%)   | 5315 (3.0%)   |
| Liver Disease                         | 2487 (1.4%)   | 2691 (1.5%)   |
| Overweight (BMI 25-30)                | 55514 (31%)   | 52003 (29%)   |
| Thalassemia                           | 1720 (1.0%)   | 1705 (0.9%)   |
| Type 1 Diabetes Mellitus              | 680 (0.4%)    | 742 (0.4%)    |

| SARS-CoV-2 - Deep Vein Thrombosis     | 1, N = 180995 | 0, N = 180995 |
|---------------------------------------|---------------|---------------|
| Age                                   | 34 (24, 47)   | 34 (24, 47)   |
| Age Groups                            |               |               |
| 16-39                                 | 110885 (61%)  | 110885 (61%)  |
| 40-49                                 | 30049 (17%)   | 30049 (17%)   |
| 50-59                                 | 18897 (10%)   | 18897 (10%)   |
| 60-69                                 | 13002 (7.2%)  | 13002 (7.2%)  |
| 70-79                                 | 5884 (3.3%)   | 5884 (3.3%)   |
| 80+                                   | 2278 (1.3%)   | 2278 (1.3%)   |
| Sex                                   |               |               |
| F                                     | 98009 (54%)   | 98009 (54%)   |
| M                                     | 82986 (46%)   | 82986 (46%)   |
| Population Sector                     |               |               |
| General Jewish                        | 95294 (53%)   | 95294 (53%)   |
| Arab                                  | 64217 (35%)   | 64217 (35%)   |
| Ultra-Orthodox Jewish                 | 21484 (12%)   | 21484 (12%)   |
| CDC Risk Factor Count                 |               |               |
| 0                                     | 112803 (62%)  | 112803 (62%)  |
| 1                                     | 43431 (24%)   | 43431 (24%)   |
| 2                                     | 12833 (7.1%)  | 12833 (7.1%)  |
| 3                                     | 5649 (3.1%)   | 5649 (3.1%)   |
| 4+                                    | 6279 (3.5%)   | 6279 (3.5%)   |
| Flu Vaccinations in the Last 5 Years  |               |               |
| 0                                     | 126150 (70%)  | 126952 (70%)  |
| 1-2                                   | 31251 (17%)   | 31009 (17%)   |
| 3-4                                   | 12918 (7.1%)  | 12694 (7.0%)  |
| 5+                                    | 10676 (5.9%)  | 10340 (5.7%)  |
| Cancer                                | 2235 (1.2%)   | 2517 (1.4%)   |
| CDC "Certain" Risk Criteria           |               |               |
| Chronic Kidney Disease                | 9076 (5.0%)   | 8916 (4.9%)   |
| Chronic Obstructive Pulmonary Disease | 2013 (1.1%)   | 2456 (1.4%)   |
| Heart Disease                         | 6489 (3.6%)   | 6722 (3.7%)   |
| Solid Organ Transplant                | 168 (<0.1%)   | 153 (<0.1%)   |
| Obesity (BMI 30-40)                   | 32278 (18%)   | 30157 (17%)   |
| Severe Obesity (BMI 40+)              | 3641 (2.0%)   | 3246 (1.8%)   |
| Pregnancy                             | 5201 (2.9%)   | 5201 (2.9%)   |
| Sickle Cell Disease                   | 53 (<0.1%)    | 58 (<0.1%)    |
| Smoking                               | 19693 (11%)   | 31695 (18%)   |
| Type 2 Diabetes Mellitus              | 13635 (7.5%)  | 13576 (7.5%)  |
| Asthma                                | 10696 (5.9%)  | 11047 (6.1%)  |
| CDC "Possible" Risk Criteria          |               |               |
| Cerebrovascular Disease               | 3082 (1.7%)   | 3182 (1.8%)   |
| Other Respiratory Disease             | 358 (0.2%)    | 401 (0.2%)    |
| Hypertension                          | 17046 (9.4%)  | 17212 (9.5%)  |
| Immunosuppression                     | 4733 (2.6%)   | 4825 (2.7%)   |
| Neurological Disease                  | 5712 (3.2%)   | 6001 (3.3%)   |
| Liver Disease                         | 2579 (1.4%)   | 2832 (1.6%)   |
| Overweight (BMI 25-30)                | 55905 (31%)   | 52442 (29%)   |
| Thalassemia                           | 1720 (1.0%)   | 1708 (0.9%)   |
| Type 1 Diabetes Mellitus              | 752 (0.4%)    | 833 (0.5%)    |

| SARS-CoV-2 - Herpes Simplex           | 1, N = 170593 | 0, N = 170593 |
|---------------------------------------|---------------|---------------|
| Age                                   | 35 (25, 48)   | 35 (25, 48)   |
| Age Groups                            |               |               |
| 16-39                                 | 103351 (61%)  | 103351 (61%)  |
| 40-49                                 | 28380 (17%)   | 28380 (17%)   |
| 50-59                                 | 18111 (11%)   | 18111 (11%)   |
| 60-69                                 | 12604 (7.4%)  | 12604 (7.4%)  |
| 70-79                                 | 5838 (3.4%)   | 5838 (3.4%)   |
| 80+                                   | 2309 (1.4%)   | 2309 (1.4%)   |
| Sex                                   |               |               |
| F                                     | 90766 (53%)   | 90766 (53%)   |
| M                                     | 79827 (47%)   | 79827 (47%)   |
| Population Sector                     |               |               |
| General Jewish                        | 89308 (52%)   | 89308 (52%)   |
| Arab                                  | 61155 (36%)   | 61155 (36%)   |
| Ultra-Orthodox Jewish                 | 20130 (12%)   | 20130 (12%)   |
| CDC Risk Factor Count                 |               |               |
| 0                                     | 105768 (62%)  | 105768 (62%)  |
| 1                                     | 40762 (24%)   | 40762 (24%)   |
| 2                                     | 12186 (7.1%)  | 12186 (7.1%)  |
| 3                                     | 5502 (3.2%)   | 5502 (3.2%)   |
| 4+                                    | 6375 (3.7%)   | 6375 (3.7%)   |
| Flu Vaccinations in the Last 5 Years  |               |               |
| 0                                     | 118688 (70%)  | 119651 (70%)  |
| 1-2                                   | 29268 (17%)   | 28882 (17%)   |
| 3-4                                   | 12324 (7.2%)  | 12118 (7.1%)  |
| 5+                                    | 10313 (6.0%)  | 9942 (5.8%)   |
| Cancer                                | 2160 (1.3%)   | 2427 (1.4%)   |
| CDC "Certain" Risk Criteria           |               |               |
| Chronic Kidney Disease                | 8803 (5.2%)   | 8651 (5.1%)   |
| Chronic Obstructive Pulmonary Disease | 2015 (1.2%)   | 2406 (1.4%)   |
| Heart Disease                         | 6547 (3.8%)   | 6719 (3.9%)   |
| Solid Organ Transplant                | 175 (0.1%)    | 149 (<0.1%)   |
| Obesity (BMI 30-40)                   | 30750 (18%)   | 28783 (17%)   |
| Severe Obesity (BMI 40+)              | 3538 (2.1%)   | 3191 (1.9%)   |
| Pregnancy                             | 4608 (2.7%)   | 4608 (2.7%)   |
| Sickle Cell Disease                   | 53 (<0.1%)    | 54 (<0.1%)    |
| Smoking                               | 18774 (11%)   | 30226 (18%)   |
| Type 2 Diabetes Mellitus              | 13422 (7.9%)  | 13325 (7.8%)  |
| Asthma                                | 9927 (5.8%)   | 10264 (6.0%)  |
| CDC "Possible" Risk Criteria          |               |               |
| Cerebrovascular Disease               | 3092 (1.8%)   | 3223 (1.9%)   |
| Other Respiratory Disease             | 358 (0.2%)    | 369 (0.2%)    |
| Hypertension                          | 16765 (9.8%)  | 16864 (9.9%)  |
| Immunosuppression                     | 4477 (2.6%)   | 4606 (2.7%)   |
| Neurological Disease                  | 5493 (3.2%)   | 5814 (3.4%)   |
| Liver Disease                         | 2511 (1.5%)   | 2733 (1.6%)   |
| Overweight (BMI 25-30)                | 52955 (31%)   | 49527 (29%)   |
| Thalassemia                           | 1626 (1.0%)   | 1603 (0.9%)   |
| Type 1 Diabetes Mellitus              | 741 (0.4%)    | 804 (0.5%)    |

| SARS-CoV-2 - Intracranial Hemorrhage  | 1, N = 182819 | 0, N = 182819 |
|---------------------------------------|---------------|---------------|
| Age                                   | 34 (25, 47)   | 34 (25, 47)   |
| Age Groups                            |               |               |
| 16-39                                 | 111395 (61%)  | 111395 (61%)  |
| 40-49                                 | 30477 (17%)   | 30477 (17%)   |
| 50-59                                 | 19313 (11%)   | 19313 (11%)   |
| 60-69                                 | 13287 (7.3%)  | 13287 (7.3%)  |
| 70-79                                 | 6033 (3.3%)   | 6033 (3.3%)   |
| 80+                                   | 2314 (1.3%)   | 2314 (1.3%)   |
| Sex                                   |               |               |
| F                                     | 99554 (54%)   | 99554 (54%)   |
| M                                     | 83265 (46%)   | 83265 (46%)   |
| Population Sector                     |               |               |
| General Jewish                        | 96134 (53%)   | 96134 (53%)   |
| Arab                                  | 64943 (36%)   | 64943 (36%)   |
| Ultra-Orthodox Jewish                 | 21742 (12%)   | 21742 (12%)   |
| CDC Risk Factor Count                 |               |               |
| 0                                     | 113418 (62%)  | 113418 (62%)  |
| 1                                     | 44071 (24%)   | 44071 (24%)   |
| 2                                     | 13127 (7.2%)  | 13127 (7.2%)  |
| 3                                     | 5849 (3.2%)   | 5849 (3.2%)   |
| 4+                                    | 6354 (3.5%)   | 6354 (3.5%)   |
| Flu Vaccinations in the Last 5 Years  |               |               |
| 0                                     | 127018 (69%)  | 127858 (70%)  |
| 1-2                                   | 31666 (17%)   | 31398 (17%)   |
| 3-4                                   | 13211 (7.2%)  | 12945 (7.1%)  |
| 5+                                    | 10924 (6.0%)  | 10618 (5.8%)  |
| Cancer                                | 2304 (1.3%)   | 2611 (1.4%)   |
| CDC "Certain" Risk Criteria           |               |               |
| Chronic Kidney Disease                | 9284 (5.1%)   | 9125 (5.0%)   |
| Chronic Obstructive Pulmonary Disease | 2038 (1.1%)   | 2543 (1.4%)   |
| Heart Disease                         | 6632 (3.6%)   | 6885 (3.8%)   |
| Solid Organ Transplant                | 179 (<0.1%)   | 164 (<0.1%)   |
| Obesity (BMI 30-40)                   | 32997 (18%)   | 30912 (17%)   |
| Severe Obesity (BMI 40+)              | 3802 (2.1%)   | 3376 (1.8%)   |
| Pregnancy                             | 5263 (2.9%)   | 5263 (2.9%)   |
| Sickle Cell Disease                   | 52 (<0.1%)    | 61 (<0.1%)    |
| Smoking                               | 19830 (11%)   | 31986 (17%)   |
| Type 2 Diabetes Mellitus              | 13932 (7.6%)  | 13857 (7.6%)  |
| Asthma                                | 10821 (5.9%)  | 11176 (6.1%)  |
| CDC "Possible" Risk Criteria          |               |               |
| Cerebrovascular Disease               | 2726 (1.5%)   | 2754 (1.5%)   |
| Other Respiratory Disease             | 371 (0.2%)    | 415 (0.2%)    |
| Hypertension                          | 17423 (9.5%)  | 17614 (9.6%)  |
| Immunosuppression                     | 4929 (2.7%)   | 5049 (2.8%)   |
| Neurological Disease                  | 5711 (3.1%)   | 5980 (3.3%)   |
| Liver Disease                         | 2693 (1.5%)   | 2899 (1.6%)   |
| Overweight (BMI 25-30)                | 56459 (31%)   | 52952 (29%)   |
| Thalassemia                           | 1764 (1.0%)   | 1755 (1.0%)   |
| Type 1 Diabetes Mellitus              | 767 (0.4%)    | 842 (0.5%)    |



| SARS-CoV-2 - Lymphadenopathy          | 1, N = 159880 | 0, N = 159880 |
|---------------------------------------|---------------|---------------|
| Age                                   | 35 (25, 48)   | 35 (25, 48)   |
| Age Groups                            |               |               |
| 16-39                                 | 95687 (60%)   | 95687 (60%)   |
| 40-49                                 | 27016 (17%)   | 27016 (17%)   |
| 50-59                                 | 17303 (11%)   | 17303 (11%)   |
| 60-69                                 | 12043 (7.5%)  | 12043 (7.5%)  |
| 70-79                                 | 5608 (3.5%)   | 5608 (3.5%)   |
| 80+                                   | 2223 (1.4%)   | 2223 (1.4%)   |
| Sex                                   |               |               |
| F                                     | 85039 (53%)   | 85039 (53%)   |
| M                                     | 74841 (47%)   | 74841 (47%)   |
| Population Sector                     |               |               |
| General Jewish                        | 83068 (52%)   | 83068 (52%)   |
| Arab                                  | 57886 (36%)   | 57886 (36%)   |
| Ultra-Orthodox Jewish                 | 18926 (12%)   | 18926 (12%)   |
| CDC Risk Factor Count                 |               |               |
| 0                                     | 99204 (62%)   | 99204 (62%)   |
| 1                                     | 38164 (24%)   | 38164 (24%)   |
| 2                                     | 11421 (7.1%)  | 11421 (7.1%)  |
| 3                                     | 5200 (3.3%)   | 5200 (3.3%)   |
| 4+                                    | 5891 (3.7%)   | 5891 (3.7%)   |
| Flu Vaccinations in the Last 5 Years  |               |               |
| 0                                     | 111432 (70%)  | 112235 (70%)  |
| 1-2                                   | 27232 (17%)   | 27032 (17%)   |
| 3-4                                   | 11545 (7.2%)  | 11249 (7.0%)  |
| 5+                                    | 9671 (6.0%)   | 9364 (5.9%)   |
| Cancer                                | 1884 (1.2%)   | 2108 (1.3%)   |
| CDC "Certain" Risk Criteria           |               |               |
| Chronic Kidney Disease                | 8167 (5.1%)   | 8005 (5.0%)   |
| Chronic Obstructive Pulmonary Disease | 1853 (1.2%)   | 2227 (1.4%)   |
| Heart Disease                         | 6122 (3.8%)   | 6330 (4.0%)   |
| Solid Organ Transplant                | 166 (0.1%)    | 150 (<0.1%)   |
| Obesity (BMI 30-40)                   | 29150 (18%)   | 27298 (17%)   |
| Severe Obesity (BMI 40+)              | 3335 (2.1%)   | 2975 (1.9%)   |
| Pregnancy                             | 4313 (2.7%)   | 4313 (2.7%)   |
| Sickle Cell Disease                   | 47 (<0.1%)    | 53 (<0.1%)    |
| Smoking                               | 17390 (11%)   | 28079 (18%)   |
| Type 2 Diabetes Mellitus              | 12637 (7.9%)  | 12573 (7.9%)  |
| Asthma                                | 8919 (5.6%)   | 9238 (5.8%)   |
| CDC "Possible" Risk Criteria          |               |               |
| Cerebrovascular Disease               | 2897 (1.8%)   | 3023 (1.9%)   |
| Other Respiratory Disease             | 304 (0.2%)    | 336 (0.2%)    |
| Hypertension                          | 15858 (9.9%)  | 16041 (10%)   |
| Immunosuppression                     | 4120 (2.6%)   | 4081 (2.6%)   |
| Neurological Disease                  | 5125 (3.2%)   | 5379 (3.4%)   |
| Liver Disease                         | 2344 (1.5%)   | 2491 (1.6%)   |
| Overweight (BMI 25-30)                | 50172 (31%)   | 46982 (29%)   |
| Thalassemia                           | 1442 (0.9%)   | 1479 (0.9%)   |
| Type 1 Diabetes Mellitus              | 679 (0.4%)    | 763 (0.5%)    |

| SARS-CoV-2 - Lymphopenia              | 1, N = 183693 | 0, N = 183693 |
|---------------------------------------|---------------|---------------|
| Age                                   | 35 (25, 48)   | 35 (25, 48)   |
| Age Groups                            |               |               |
| 16-39                                 | 111363 (61%)  | 111363 (61%)  |
| 40-49                                 | 30527 (17%)   | 30527 (17%)   |
| 50-59                                 | 19416 (11%)   | 19416 (11%)   |
| 60-69                                 | 13553 (7.4%)  | 13553 (7.4%)  |
| 70-79                                 | 6339 (3.5%)   | 6339 (3.5%)   |
| 80+                                   | 2495 (1.4%)   | 2495 (1.4%)   |
| Sex                                   |               |               |
| F                                     | 99860 (54%)   | 99860 (54%)   |
| M                                     | 83833 (46%)   | 83833 (46%)   |
| Population Sector                     |               |               |
| General Jewish                        | 96699 (53%)   | 96699 (53%)   |
| Arab                                  | 65210 (35%)   | 65210 (35%)   |
| Ultra-Orthodox Jewish                 | 21784 (12%)   | 21784 (12%)   |
| CDC Risk Factor Count                 |               |               |
| 0                                     | 113363 (62%)  | 113363 (62%)  |
| 1                                     | 44128 (24%)   | 44128 (24%)   |
| 2                                     | 13268 (7.2%)  | 13268 (7.2%)  |
| 3                                     | 6017 (3.3%)   | 6017 (3.3%)   |
| 4+                                    | 6917 (3.8%)   | 6917 (3.8%)   |
| Flu Vaccinations in the Last 5 Years  |               |               |
| 0                                     | 127084 (69%)  | 127943 (70%)  |
| 1-2                                   | 31816 (17%)   | 31555 (17%)   |
| 3-4                                   | 13470 (7.3%)  | 13213 (7.2%)  |
| 5+                                    | 11323 (6.2%)  | 10982 (6.0%)  |
| Cancer                                | 2357 (1.3%)   | 2663 (1.4%)   |
| CDC "Certain" Risk Criteria           |               |               |
| Chronic Kidney Disease                | 9593 (5.2%)   | 9388 (5.1%)   |
| Chronic Obstructive Pulmonary Disease | 2165 (1.2%)   | 2636 (1.4%)   |
| Heart Disease                         | 7024 (3.8%)   | 7263 (4.0%)   |
| Solid Organ Transplant                | 179 (<0.1%)   | 169 (<0.1%)   |
| Obesity (BMI 30-40)                   | 33362 (18%)   | 31208 (17%)   |
| Severe Obesity (BMI 40+)              | 3852 (2.1%)   | 3434 (1.9%)   |
| Pregnancy                             | 5259 (2.9%)   | 5259 (2.9%)   |
| Sickle Cell Disease                   | 55 (<0.1%)    | 61 (<0.1%)    |
| Smoking                               | 19971 (11%)   | 32191 (18%)   |
| Type 2 Diabetes Mellitus              | 14409 (7.8%)  | 14319 (7.8%)  |
| Asthma                                | 10923 (5.9%)  | 11270 (6.1%)  |
| CDC "Possible" Risk Criteria          |               |               |
| Cerebrovascular Disease               | 3406 (1.9%)   | 3484 (1.9%)   |
| Other Respiratory Disease             | 377 (0.2%)    | 429 (0.2%)    |
| Hypertension                          | 18140 (9.9%)  | 18318 (10.0%) |
| Immunosuppression                     | 5001 (2.7%)   | 5120 (2.8%)   |
| Neurological Disease                  | 6004 (3.3%)   | 6314 (3.4%)   |
| Liver Disease                         | 2737 (1.5%)   | 2960 (1.6%)   |
| Overweight (BMI 25-30)                | 56783 (31%)   | 53326 (29%)   |
| Thalassemia                           | 1776 (1.0%)   | 1763 (1.0%)   |
| Type 1 Diabetes Mellitus              | 799 (0.4%)    | 866 (0.5%)    |

| SARS-CoV-2 - Myocardial Infarction    | 1, N = 176200 | 0, N = 176200 |
|---------------------------------------|---------------|---------------|
| Age                                   | 34 (24, 46)   | 34 (24, 46)   |
| Age Groups                            |               |               |
| 16-39                                 | 111364 (63%)  | 111364 (63%)  |
| 40-49                                 | 30119 (17%)   | 30119 (17%)   |
| 50-59                                 | 18073 (10%)   | 18073 (10%)   |
| 60-69                                 | 11082 (6.3%)  | 11082 (6.3%)  |
| 70-79                                 | 4187 (2.4%)   | 4187 (2.4%)   |
| 80+                                   | 1375 (0.8%)   | 1375 (0.8%)   |
| Sex                                   |               |               |
| F                                     | 97519 (55%)   | 97519 (55%)   |
| M                                     | 78681 (45%)   | 78681 (45%)   |
| Population Sector                     |               |               |
| General Jewish                        | 92421 (52%)   | 92421 (52%)   |
| Arab                                  | 62397 (35%)   | 62397 (35%)   |
| Ultra-Orthodox Jewish                 | 21382 (12%)   | 21382 (12%)   |
| CDC Risk Factor Count                 |               |               |
| 0                                     | 113382 (64%)  | 113382 (64%)  |
| 1                                     | 43542 (25%)   | 43542 (25%)   |
| 2                                     | 12019 (6.8%)  | 12019 (6.8%)  |
| 3                                     | 4453 (2.5%)   | 4453 (2.5%)   |
| 4+                                    | 2804 (1.6%)   | 2804 (1.6%)   |
| Flu Vaccinations in the Last 5 Years  |               |               |
| 0                                     | 126383 (72%)  | 127280 (72%)  |
| 1-2                                   | 30352 (17%)   | 29964 (17%)   |
| 3-4                                   | 11251 (6.4%)  | 11104 (6.3%)  |
| 5+                                    | 8214 (4.7%)   | 7852 (4.5%)   |
| Cancer                                | 1849 (1.0%)   | 2117 (1.2%)   |
| CDC "Certain" Risk Criteria           |               |               |
| Chronic Kidney Disease                | 7133 (4.0%)   | 7117 (4.0%)   |
| Chronic Obstructive Pulmonary Disease | 1245 (0.7%)   | 1611 (0.9%)   |
| Heart Disease                         | 950 (0.5%)    | 931 (0.5%)    |
| Solid Organ Transplant                | 110 (<0.1%)   | 102 (<0.1%)   |
| Obesity (BMI 30-40)                   | 30262 (17%)   | 28440 (16%)   |
| Severe Obesity (BMI 40+)              | 3474 (2.0%)   | 3135 (1.8%)   |
| Pregnancy                             | 5257 (3.0%)   | 5257 (3.0%)   |
| Sickle Cell Disease                   | 52 (<0.1%)    | 57 (<0.1%)    |
| Smoking                               | 18998 (11%)   | 30442 (17%)   |
| Type 2 Diabetes Mellitus              | 10272 (5.8%)  | 10285 (5.8%)  |
| Asthma                                | 10177 (5.8%)  | 10511 (6.0%)  |
| CDC "Possible" Risk Criteria          |               |               |
| Cerebrovascular Disease               | 1916 (1.1%)   | 2009 (1.1%)   |
| Other Respiratory Disease             | 275 (0.2%)    | 321 (0.2%)    |
| Hypertension                          | 12566 (7.1%)  | 12754 (7.2%)  |
| Immunosuppression                     | 4181 (2.4%)   | 4348 (2.5%)   |
| Neurological Disease                  | 5006 (2.8%)   | 5291 (3.0%)   |
| Liver Disease                         | 2188 (1.2%)   | 2436 (1.4%)   |
| Overweight (BMI 25-30)                | 53986 (31%)   | 50500 (29%)   |
| Thalassemia                           | 1661 (0.9%)   | 1648 (0.9%)   |
| Type 1 Diabetes Mellitus              | 588 (0.3%)    | 686 (0.4%)    |

| SARS-CoV-2 - Myocarditis              | 1, N = 183710 | 0, N = 183710 |
|---------------------------------------|---------------|---------------|
| Age                                   | 35 (25, 48)   | 35 (25, 48)   |
| Age Groups                            |               |               |
| 16-39                                 | 111369 (61%)  | 111369 (61%)  |
| 40-49                                 | 30481 (17%)   | 30481 (17%)   |
| 50-59                                 | 19429 (11%)   | 19429 (11%)   |
| 60-69                                 | 13577 (7.4%)  | 13577 (7.4%)  |
| 70-79                                 | 6349 (3.5%)   | 6349 (3.5%)   |
| 80+                                   | 2505 (1.4%)   | 2505 (1.4%)   |
| Sex                                   |               |               |
| F                                     | 99982 (54%)   | 99982 (54%)   |
| M                                     | 83728 (46%)   | 83728 (46%)   |
| Population Sector                     |               |               |
| General Jewish                        | 96704 (53%)   | 96704 (53%)   |
| Arab                                  | 65205 (35%)   | 65205 (35%)   |
| Ultra-Orthodox Jewish                 | 21801 (12%)   | 21801 (12%)   |
| CDC Risk Factor Count                 |               |               |
| 0                                     | 113374 (62%)  | 113374 (62%)  |
| 1                                     | 44116 (24%)   | 44116 (24%)   |
| 2                                     | 13256 (7.2%)  | 13256 (7.2%)  |
| 3                                     | 6021 (3.3%)   | 6021 (3.3%)   |
| 4+                                    | 6943 (3.8%)   | 6943 (3.8%)   |
| Flu Vaccinations in the Last 5 Years  |               |               |
| 0                                     | 127066 (69%)  | 127893 (70%)  |
| 1-2                                   | 31816 (17%)   | 31580 (17%)   |
| 3-4                                   | 13482 (7.3%)  | 13234 (7.2%)  |
| 5+                                    | 11346 (6.2%)  | 11003 (6.0%)  |
| Cancer                                | 2373 (1.3%)   | 2674 (1.5%)   |
| CDC "Certain" Risk Criteria           |               |               |
| Chronic Kidney Disease                | 9612 (5.2%)   | 9438 (5.1%)   |
| Chronic Obstructive Pulmonary Disease | 2168 (1.2%)   | 2639 (1.4%)   |
| Heart Disease                         | 6999 (3.8%)   | 7224 (3.9%)   |
| Solid Organ Transplant                | 191 (0.1%)    | 171 (<0.1%)   |
| Obesity (BMI 30-40)                   | 33325 (18%)   | 31194 (17%)   |
| Severe Obesity (BMI 40+)              | 3856 (2.1%)   | 3418 (1.9%)   |
| Pregnancy                             | 5263 (2.9%)   | 5263 (2.9%)   |
| Sickle Cell Disease                   | 55 (<0.1%)    | 61 (<0.1%)    |
| Smoking                               | 19941 (11%)   | 32146 (17%)   |
| Type 2 Diabetes Mellitus              | 14421 (7.8%)  | 14352 (7.8%)  |
| Asthma                                | 10930 (5.9%)  | 11286 (6.1%)  |
| CDC "Possible" Risk Criteria          |               |               |
| Cerebrovascular Disease               | 3418 (1.9%)   | 3500 (1.9%)   |
| Other Respiratory Disease             | 384 (0.2%)    | 431 (0.2%)    |
| Hypertension                          | 18152 (9.9%)  | 18338 (10.0%) |
| Immunosuppression                     | 5018 (2.7%)   | 5128 (2.8%)   |
| Neurological Disease                  | 6032 (3.3%)   | 6323 (3.4%)   |
| Liver Disease                         | 2755 (1.5%)   | 2975 (1.6%)   |
| Overweight (BMI 25-30)                | 56776 (31%)   | 53292 (29%)   |
| Thalassemia                           | 1773 (1.0%)   | 1762 (1.0%)   |
| Type 1 Diabetes Mellitus              | 802 (0.4%)    | 868 (0.5%)    |

| SARS-CoV-2 - Neutropenia              | 1, N = 179528 | 0, N = 179528 |
|---------------------------------------|---------------|---------------|
| Age                                   | 34 (25, 48)   | 34 (25, 48)   |
| Age Groups                            |               |               |
| 16-39                                 | 109149 (61%)  | 109149 (61%)  |
| 40-49                                 | 29843 (17%)   | 29843 (17%)   |
| 50-59                                 | 18909 (11%)   | 18909 (11%)   |
| 60-69                                 | 13144 (7.3%)  | 13144 (7.3%)  |
| 70-79                                 | 6104 (3.4%)   | 6104 (3.4%)   |
| 80+                                   | 2379 (1.3%)   | 2379 (1.3%)   |
| Sex                                   |               |               |
| F                                     | 97047 (54%)   | 97047 (54%)   |
| M                                     | 82481 (46%)   | 82481 (46%)   |
| Population Sector                     |               |               |
| General Jewish                        | 94226 (52%)   | 94226 (52%)   |
| Arab                                  | 63947 (36%)   | 63947 (36%)   |
| Ultra-Orthodox Jewish                 | 21355 (12%)   | 21355 (12%)   |
| CDC Risk Factor Count                 |               |               |
| 0                                     | 111029 (62%)  | 111029 (62%)  |
| 1                                     | 43146 (24%)   | 43146 (24%)   |
| 2                                     | 12888 (7.2%)  | 12888 (7.2%)  |
| 3                                     | 5824 (3.2%)   | 5824 (3.2%)   |
| 4+                                    | 6641 (3.7%)   | 6641 (3.7%)   |
| Flu Vaccinations in the Last 5 Years  |               |               |
| 0                                     | 124734 (69%)  | 125538 (70%)  |
| 1-2                                   | 30916 (17%)   | 30674 (17%)   |
| 3-4                                   | 13001 (7.2%)  | 12780 (7.1%)  |
| 5+                                    | 10877 (6.1%)  | 10536 (5.9%)  |
| Cancer                                | 2141 (1.2%)   | 2419 (1.3%)   |
| CDC "Certain" Risk Criteria           |               |               |
| Chronic Kidney Disease                | 9245 (5.1%)   | 9050 (5.0%)   |
| Chronic Obstructive Pulmonary Disease | 2089 (1.2%)   | 2550 (1.4%)   |
| Heart Disease                         | 6792 (3.8%)   | 7066 (3.9%)   |
| Solid Organ Transplant                | 155 (<0.1%)   | 154 (<0.1%)   |
| Obesity (BMI 30-40)                   | 32725 (18%)   | 30632 (17%)   |
| Severe Obesity (BMI 40+)              | 3792 (2.1%)   | 3364 (1.9%)   |
| Pregnancy                             | 5114 (2.8%)   | 5114 (2.8%)   |
| Sickle Cell Disease                   | 52 (<0.1%)    | 63 (<0.1%)    |
| Smoking                               | 19659 (11%)   | 31673 (18%)   |
| Type 2 Diabetes Mellitus              | 14027 (7.8%)  | 13971 (7.8%)  |
| Asthma                                | 10617 (5.9%)  | 10933 (6.1%)  |
| CDC "Possible" Risk Criteria          |               |               |
| Cerebrovascular Disease               | 3292 (1.8%)   | 3379 (1.9%)   |
| Other Respiratory Disease             | 354 (0.2%)    | 400 (0.2%)    |
| Hypertension                          | 17605 (9.8%)  | 17792 (9.9%)  |
| Immunosuppression                     | 4704 (2.6%)   | 4825 (2.7%)   |
| Neurological Disease                  | 5761 (3.2%)   | 6061 (3.4%)   |
| Liver Disease                         | 2591 (1.4%)   | 2785 (1.6%)   |
| Overweight (BMI 25-30)                | 55614 (31%)   | 52249 (29%)   |
| Thalassemia                           | 1726 (1.0%)   | 1704 (0.9%)   |
| Type 1 Diabetes Mellitus              | 782 (0.4%)    | 846 (0.5%)    |

| SARS-CoV-2 - Other Thrombosis         | 1, N = 182553 | 0, N = 182553 |
|---------------------------------------|---------------|---------------|
| Age                                   | 34 (24, 47)   | 34 (25, 47)   |
| Age Groups                            |               |               |
| 16-39                                 | 111270 (61%)  | 111270 (61%)  |
| 40-49                                 | 30337 (17%)   | 30337 (17%)   |
| 50-59                                 | 19165 (10%)   | 19165 (10%)   |
| 60-69                                 | 13293 (7.3%)  | 13293 (7.3%)  |
| 70-79                                 | 6102 (3.3%)   | 6102 (3.3%)   |
| 80+                                   | 2386 (1.3%)   | 2386 (1.3%)   |
| Sex                                   |               |               |
| F                                     | 99242 (54%)   | 99242 (54%)   |
| M                                     | 83311 (46%)   | 83311 (46%)   |
| Population Sector                     |               |               |
| General Jewish                        | 96058 (53%)   | 96058 (53%)   |
| Arab                                  | 64795 (35%)   | 64795 (35%)   |
| Ultra-Orthodox Jewish                 | 21700 (12%)   | 21700 (12%)   |
| CDC Risk Factor Count                 |               |               |
| 0                                     | 113251 (62%)  | 113251 (62%)  |
| 1                                     | 43879 (24%)   | 43879 (24%)   |
| 2                                     | 13068 (7.2%)  | 13068 (7.2%)  |
| 3                                     | 5840 (3.2%)   | 5840 (3.2%)   |
| 4+                                    | 6515 (3.6%)   | 6515 (3.6%)   |
| Flu Vaccinations in the Last 5 Years  |               |               |
| 0                                     | 126806 (69%)  | 127626 (70%)  |
| 1-2                                   | 31561 (17%)   | 31314 (17%)   |
| 3-4                                   | 13201 (7.2%)  | 12984 (7.1%)  |
| 5+                                    | 10985 (6.0%)  | 10629 (5.8%)  |
| Cancer                                | 2277 (1.2%)   | 2572 (1.4%)   |
| CDC "Certain" Risk Criteria           |               |               |
| Chronic Kidney Disease                | 9273 (5.1%)   | 9121 (5.0%)   |
| Chronic Obstructive Pulmonary Disease | 2064 (1.1%)   | 2500 (1.4%)   |
| Heart Disease                         | 6628 (3.6%)   | 6852 (3.8%)   |
| Solid Organ Transplant                | 170 (<0.1%)   | 154 (<0.1%)   |
| Obesity (BMI 30-40)                   | 32865 (18%)   | 30785 (17%)   |
| Severe Obesity (BMI 40+)              | 3790 (2.1%)   | 3377 (1.8%)   |
| Pregnancy                             | 5247 (2.9%)   | 5247 (2.9%)   |
| Sickle Cell Disease                   | 54 (<0.1%)    | 61 (<0.1%)    |
| Smoking                               | 19795 (11%)   | 31875 (17%)   |
| Type 2 Diabetes Mellitus              | 13953 (7.6%)  | 13930 (7.6%)  |
| Asthma                                | 10819 (5.9%)  | 11157 (6.1%)  |
| CDC "Possible" Risk Criteria          |               |               |
| Cerebrovascular Disease               | 3202 (1.8%)   | 3299 (1.8%)   |
| Other Respiratory Disease             | 372 (0.2%)    | 417 (0.2%)    |
| Hypertension                          | 17549 (9.6%)  | 17718 (9.7%)  |
| Immunosuppression                     | 4884 (2.7%)   | 4956 (2.7%)   |
| Neurological Disease                  | 5883 (3.2%)   | 6151 (3.4%)   |
| Liver Disease                         | 2625 (1.4%)   | 2865 (1.6%)   |
| Overweight (BMI 25-30)                | 56389 (31%)   | 52895 (29%)   |
| Thalassemia                           | 1749 (1.0%)   | 1745 (1.0%)   |
| Type 1 Diabetes Mellitus              | 764 (0.4%)    | 843 (0.5%)    |

| SARS-CoV-2 - Paresthesia              | 1, N = 161836 | 0, N = 161836 |
|---------------------------------------|---------------|---------------|
| Age                                   | 33 (24, 45)   | 33 (24, 45)   |
| Age Groups                            |               |               |
| 16-39                                 | 105044 (65%)  | 105044 (65%)  |
| 40-49                                 | 25399 (16%)   | 25399 (16%)   |
| 50-59                                 | 14916 (9.2%)  | 14916 (9.2%)  |
| 60-69                                 | 9989 (6.2%)   | 9989 (6.2%)   |
| 70-79                                 | 4628 (2.9%)   | 4628 (2.9%)   |
| 80+                                   | 1860 (1.1%)   | 1860 (1.1%)   |
| Sex                                   |               |               |
| F                                     | 86161 (53%)   | 86161 (53%)   |
| M                                     | 75675 (47%)   | 75675 (47%)   |
| Population Sector                     |               |               |
| General Jewish                        | 85419 (53%)   | 85419 (53%)   |
| Arab                                  | 55984 (35%)   | 55984 (35%)   |
| Ultra-Orthodox Jewish                 | 20433 (13%)   | 20433 (13%)   |
| CDC Risk Factor Count                 |               |               |
| 0                                     | 105228 (65%)  | 105228 (65%)  |
| 1                                     | 38120 (24%)   | 38120 (24%)   |
| 2                                     | 10142 (6.3%)  | 10142 (6.3%)  |
| 3                                     | 4097 (2.5%)   | 4097 (2.5%)   |
| 4+                                    | 4249 (2.6%)   | 4249 (2.6%)   |
| Flu Vaccinations in the Last 5 Years  |               |               |
| 0                                     | 116168 (72%)  | 116919 (72%)  |
| 1-2                                   | 27328 (17%)   | 26998 (17%)   |
| 3-4                                   | 10307 (6.4%)  | 10127 (6.3%)  |
| 5+                                    | 8033 (5.0%)   | 7792 (4.8%)   |
| Cancer                                | 1717 (1.1%)   | 1964 (1.2%)   |
| CDC "Certain" Risk Criteria           |               |               |
| Chronic Kidney Disease                | 7014 (4.3%)   | 6957 (4.3%)   |
| Chronic Obstructive Pulmonary Disease | 1499 (0.9%)   | 1825 (1.1%)   |
| Heart Disease                         | 4752 (2.9%)   | 4929 (3.0%)   |
| Solid Organ Transplant                | 127 (<0.1%)   | 112 (<0.1%)   |
| Obesity (BMI 30-40)                   | 26582 (16%)   | 24893 (15%)   |
| Severe Obesity (BMI 40+)              | 2977 (1.8%)   | 2670 (1.6%)   |
| Pregnancy                             | 4839 (3.0%)   | 4839 (3.0%)   |
| Sickle Cell Disease                   | 47 (<0.1%)    | 45 (<0.1%)    |
| Smoking                               | 17468 (11%)   | 27871 (17%)   |
| Type 2 Diabetes Mellitus              | 10121 (6.3%)  | 10122 (6.3%)  |
| Asthma                                | 9341 (5.8%)   | 9618 (5.9%)   |
| CDC "Possible" Risk Criteria          |               |               |
| Cerebrovascular Disease               | 1994 (1.2%)   | 2082 (1.3%)   |
| Other Respiratory Disease             | 267 (0.2%)    | 307 (0.2%)    |
| Hypertension                          | 12626 (7.8%)  | 12832 (7.9%)  |
| Immunosuppression                     | 3509 (2.2%)   | 3600 (2.2%)   |
| Neurological Disease                  | 4469 (2.8%)   | 4603 (2.8%)   |
| Liver Disease                         | 1977 (1.2%)   | 2217 (1.4%)   |
| Overweight (BMI 25-30)                | 49086 (30%)   | 45748 (28%)   |
| Thalassemia                           | 1474 (0.9%)   | 1493 (0.9%)   |
| Type 1 Diabetes Mellitus              | 596 (0.4%)    | 648 (0.4%)    |

| SARS-CoV-2 - Pulmonary Embolism       | 1, N = 183311 | 0, N = 183311 |
|---------------------------------------|---------------|---------------|
| Age                                   | 34 (25, 48)   | 34 (25, 48)   |
| Age Groups                            |               |               |
| 16-39                                 | 111399 (61%)  | 111399 (61%)  |
| 40-49                                 | 30445 (17%)   | 30445 (17%)   |
| 50-59                                 | 19342 (11%)   | 19342 (11%)   |
| 60-69                                 | 13471 (7.3%)  | 13471 (7.3%)  |
| 70-79                                 | 6230 (3.4%)   | 6230 (3.4%)   |
| 80+                                   | 2424 (1.3%)   | 2424 (1.3%)   |
| Sex                                   |               |               |
| F                                     | 99596 (54%)   | 99596 (54%)   |
| M                                     | 83715 (46%)   | 83715 (46%)   |
| Population Sector                     |               |               |
| General Jewish                        | 96492 (53%)   | 96492 (53%)   |
| Arab                                  | 65063 (35%)   | 65063 (35%)   |
| Ultra-Orthodox Jewish                 | 21756 (12%)   | 21756 (12%)   |
| CDC Risk Factor Count                 |               |               |
| 0                                     | 113371 (62%)  | 113371 (62%)  |
| 1                                     | 44071 (24%)   | 44071 (24%)   |
| 2                                     | 13182 (7.2%)  | 13182 (7.2%)  |
| 3                                     | 5953 (3.2%)   | 5953 (3.2%)   |
| 4+                                    | 6734 (3.7%)   | 6734 (3.7%)   |
| Flu Vaccinations in the Last 5 Years  |               |               |
| 0                                     | 127045 (69%)  | 127879 (70%)  |
| 1-2                                   | 31726 (17%)   | 31500 (17%)   |
| 3-4                                   | 13346 (7.3%)  | 13119 (7.2%)  |
| 5+                                    | 11194 (6.1%)  | 10813 (5.9%)  |
| Cancer                                | 2316 (1.3%)   | 2618 (1.4%)   |
| CDC "Certain" Risk Criteria           |               |               |
| Chronic Kidney Disease                | 9471 (5.2%)   | 9301 (5.1%)   |
| Chronic Obstructive Pulmonary Disease | 2103 (1.1%)   | 2562 (1.4%)   |
| Heart Disease                         | 6863 (3.7%)   | 7100 (3.9%)   |
| Solid Organ Transplant                | 184 (0.1%)    | 169 (<0.1%)   |
| Obesity (BMI 30-40)                   | 33150 (18%)   | 30992 (17%)   |
| Severe Obesity (BMI 40+)              | 3814 (2.1%)   | 3388 (1.8%)   |
| Pregnancy                             | 5253 (2.9%)   | 5253 (2.9%)   |
| Sickle Cell Disease                   | 55 (<0.1%)    | 61 (<0.1%)    |
| Smoking                               | 19920 (11%)   | 32088 (18%)   |
| Type 2 Diabetes Mellitus              | 14228 (7.8%)  | 14149 (7.7%)  |
| Asthma                                | 10861 (5.9%)  | 11232 (6.1%)  |
| CDC "Possible" Risk Criteria          |               |               |
| Cerebrovascular Disease               | 3336 (1.8%)   | 3418 (1.9%)   |
| Other Respiratory Disease             | 372 (0.2%)    | 422 (0.2%)    |
| Hypertension                          | 17879 (9.8%)  | 18044 (9.8%)  |
| Immunosuppression                     | 4943 (2.7%)   | 5051 (2.8%)   |
| Neurological Disease                  | 5964 (3.3%)   | 6258 (3.4%)   |
| Liver Disease                         | 2697 (1.5%)   | 2936 (1.6%)   |
| Overweight (BMI 25-30)                | 56654 (31%)   | 53218 (29%)   |
| Thalassemia                           | 1766 (1.0%)   | 1757 (1.0%)   |
| Type 1 Diabetes Mellitus              | 786 (0.4%)    | 862 (0.5%)    |



| SARS-CoV-2 - Pericarditis             | 1, N = 183158 | 0, N = 183158 |
|---------------------------------------|---------------|---------------|
| Age                                   | 34 (25, 48)   | 34 (25, 48)   |
| Age Groups                            |               |               |
| 16-39                                 | 111261 (61%)  | 111261 (61%)  |
| 40-49                                 | 30403 (17%)   | 30403 (17%)   |
| 50-59                                 | 19311 (11%)   | 19311 (11%)   |
| 60-69                                 | 13452 (7.3%)  | 13452 (7.3%)  |
| 70-79                                 | 6266 (3.4%)   | 6266 (3.4%)   |
| 80+                                   | 2465 (1.3%)   | 2465 (1.3%)   |
| Sex                                   |               |               |
| F                                     | 99746 (54%)   | 99746 (54%)   |
| M                                     | 83412 (46%)   | 83412 (46%)   |
| Population Sector                     |               |               |
| General Jewish                        | 96464 (53%)   | 96464 (53%)   |
| Arab                                  | 64937 (35%)   | 64937 (35%)   |
| Ultra-Orthodox Jewish                 | 21757 (12%)   | 21757 (12%)   |
| CDC Risk Factor Count                 |               |               |
| 0                                     | 113256 (62%)  | 113256 (62%)  |
| 1                                     | 44010 (24%)   | 44010 (24%)   |
| 2                                     | 13188 (7.2%)  | 13188 (7.2%)  |
| 3                                     | 5937 (3.2%)   | 5937 (3.2%)   |
| 4+                                    | 6767 (3.7%)   | 6767 (3.7%)   |
| Flu Vaccinations in the Last 5 Years  |               |               |
| 0                                     | 126877 (69%)  | 127742 (70%)  |
| 1-2                                   | 31724 (17%)   | 31479 (17%)   |
| 3-4                                   | 13375 (7.3%)  | 13096 (7.2%)  |
| 5+                                    | 11182 (6.1%)  | 10841 (5.9%)  |
| Cancer                                | 2338 (1.3%)   | 2644 (1.4%)   |
| CDC "Certain" Risk Criteria           |               |               |
| Chronic Kidney Disease                | 9473 (5.2%)   | 9320 (5.1%)   |
| Chronic Obstructive Pulmonary Disease | 2114 (1.2%)   | 2576 (1.4%)   |
| Heart Disease                         | 6801 (3.7%)   | 7043 (3.8%)   |
| Solid Organ Transplant                | 173 (<0.1%)   | 164 (<0.1%)   |
| Obesity (BMI 30-40)                   | 33128 (18%)   | 31016 (17%)   |
| Severe Obesity (BMI 40+)              | 3824 (2.1%)   | 3408 (1.9%)   |
| Pregnancy                             | 5262 (2.9%)   | 5262 (2.9%)   |
| Sickle Cell Disease                   | 55 (<0.1%)    | 61 (<0.1%)    |
| Smoking                               | 19875 (11%)   | 32058 (18%)   |
| Type 2 Diabetes Mellitus              | 14235 (7.8%)  | 14157 (7.7%)  |
| Asthma                                | 10869 (5.9%)  | 11215 (6.1%)  |
| CDC "Possible" Risk Criteria          |               |               |
| Cerebrovascular Disease               | 3336 (1.8%)   | 3441 (1.9%)   |
| Other Respiratory Disease             | 373 (0.2%)    | 420 (0.2%)    |
| Hypertension                          | 17904 (9.8%)  | 18090 (9.9%)  |
| Immunosuppression                     | 4935 (2.7%)   | 5047 (2.8%)   |
| Neurological Disease                  | 5990 (3.3%)   | 6275 (3.4%)   |
| Liver Disease                         | 2722 (1.5%)   | 2932 (1.6%)   |
| Overweight (BMI 25-30)                | 56591 (31%)   | 53096 (29%)   |
| Thalassemia                           | 1771 (1.0%)   | 1749 (1.0%)   |
| Type 1 Diabetes Mellitus              | 793 (0.4%)    | 854 (0.5%)    |

| SARS-CoV-2 - Seizures                 | 1, N = 178402 | 0, N = 178402 |
|---------------------------------------|---------------|---------------|
| Age                                   | 35 (25, 48)   | 35 (25, 48)   |
| Age Groups                            |               |               |
| 16-39                                 | 108194 (61%)  | 108194 (61%)  |
| 40-49                                 | 29780 (17%)   | 29780 (17%)   |
| 50-59                                 | 18896 (11%)   | 18896 (11%)   |
| 60-69                                 | 13110 (7.3%)  | 13110 (7.3%)  |
| 70-79                                 | 6058 (3.4%)   | 6058 (3.4%)   |
| 80+                                   | 2364 (1.3%)   | 2364 (1.3%)   |
| Sex                                   |               |               |
| F                                     | 97143 (54%)   | 97143 (54%)   |
| M                                     | 81259 (46%)   | 81259 (46%)   |
| Population Sector                     |               |               |
| General Jewish                        | 93537 (52%)   | 93537 (52%)   |
| Arab                                  | 63506 (36%)   | 63506 (36%)   |
| Ultra-Orthodox Jewish                 | 21359 (12%)   | 21359 (12%)   |
| CDC Risk Factor Count                 |               |               |
| 0                                     | 111777 (63%)  | 111777 (63%)  |
| 1                                     | 42096 (24%)   | 42096 (24%)   |
| 2                                     | 12438 (7.0%)  | 12438 (7.0%)  |
| 3                                     | 5688 (3.2%)   | 5688 (3.2%)   |
| 4+                                    | 6403 (3.6%)   | 6403 (3.6%)   |
| Flu Vaccinations in the Last 5 Years  |               |               |
| 0                                     | 124229 (70%)  | 124876 (70%)  |
| 1-2                                   | 30791 (17%)   | 30484 (17%)   |
| 3-4                                   | 12805 (7.2%)  | 12621 (7.1%)  |
| 5+                                    | 10577 (5.9%)  | 10421 (5.8%)  |
| Cancer                                | 2243 (1.3%)   | 2529 (1.4%)   |
| CDC "Certain" Risk Criteria           |               |               |
| Chronic Kidney Disease                | 9131 (5.1%)   | 8955 (5.0%)   |
| Chronic Obstructive Pulmonary Disease | 2033 (1.1%)   | 2495 (1.4%)   |
| Heart Disease                         | 6677 (3.7%)   | 6887 (3.9%)   |
| Solid Organ Transplant                | 174 (<0.1%)   | 154 (<0.1%)   |
| Obesity (BMI 30-40)                   | 32239 (18%)   | 30181 (17%)   |
| Severe Obesity (BMI 40+)              | 3679 (2.1%)   | 3284 (1.8%)   |
| Pregnancy                             | 5153 (2.9%)   | 5153 (2.9%)   |
| Sickle Cell Disease                   | 54 (<0.1%)    | 57 (<0.1%)    |
| Smoking                               | 19406 (11%)   | 31213 (17%)   |
| Type 2 Diabetes Mellitus              | 13776 (7.7%)  | 13728 (7.7%)  |
| Asthma                                | 10414 (5.8%)  | 10810 (6.1%)  |
| CDC "Possible" Risk Criteria          |               |               |
| Cerebrovascular Disease               | 3068 (1.7%)   | 3117 (1.7%)   |
| Other Respiratory Disease             | 361 (0.2%)    | 412 (0.2%)    |
| Hypertension                          | 17314 (9.7%)  | 17502 (9.8%)  |
| Immunosuppression                     | 4769 (2.7%)   | 4868 (2.7%)   |
| Neurological Disease                  | 3964 (2.2%)   | 4157 (2.3%)   |
| Liver Disease                         | 2604 (1.5%)   | 2789 (1.6%)   |
| Overweight (BMI 25-30)                | 55286 (31%)   | 51950 (29%)   |
| Thalassemia                           | 1694 (0.9%)   | 1660 (0.9%)   |
| Type 1 Diabetes Mellitus              | 728 (0.4%)    | 798 (0.4%)    |

| SARS-CoV-2 - Syncope                  | 1, N = 168207 | 0, N = 168207 |
|---------------------------------------|---------------|---------------|
| Age                                   | 34 (24, 47)   | 34 (24, 47)   |
| Age Groups                            |               |               |
| 16-39                                 | 102889 (61%)  | 102889 (61%)  |
| 40-49                                 | 28311 (17%)   | 28311 (17%)   |
| 50-59                                 | 17744 (11%)   | 17744 (11%)   |
| 60-69                                 | 12103 (7.2%)  | 12103 (7.2%)  |
| 70-79                                 | 5287 (3.1%)   | 5287 (3.1%)   |
| 80+                                   | 1873 (1.1%)   | 1873 (1.1%)   |
| Sex                                   |               |               |
| F                                     | 89805 (53%)   | 89805 (53%)   |
| M                                     | 78402 (47%)   | 78402 (47%)   |
| Population Sector                     |               |               |
| General Jewish                        | 87415 (52%)   | 87415 (52%)   |
| Arab                                  | 60150 (36%)   | 60150 (36%)   |
| Ultra-Orthodox Jewish                 | 20642 (12%)   | 20642 (12%)   |
| CDC Risk Factor Count                 |               |               |
| 0                                     | 105762 (63%)  | 105762 (63%)  |
| 1                                     | 40231 (24%)   | 40231 (24%)   |
| 2                                     | 11733 (7.0%)  | 11733 (7.0%)  |
| 3                                     | 5158 (3.1%)   | 5158 (3.1%)   |
| 4+                                    | 5323 (3.2%)   | 5323 (3.2%)   |
| Flu Vaccinations in the Last 5 Years  |               |               |
| 0                                     | 118207 (70%)  | 118903 (71%)  |
| 1-2                                   | 28708 (17%)   | 28437 (17%)   |
| 3-4                                   | 11764 (7.0%)  | 11598 (6.9%)  |
| 5+                                    | 9528 (5.7%)   | 9269 (5.5%)   |
| Cancer                                | 1991 (1.2%)   | 2257 (1.3%)   |
| CDC "Certain" Risk Criteria           |               |               |
| Chronic Kidney Disease                | 8000 (4.8%)   | 7925 (4.7%)   |
| Chronic Obstructive Pulmonary Disease | 1694 (1.0%)   | 2110 (1.3%)   |
| Heart Disease                         | 5512 (3.3%)   | 5736 (3.4%)   |
| Solid Organ Transplant                | 154 (<0.1%)   | 144 (<0.1%)   |
| Obesity (BMI 30-40)                   | 30045 (18%)   | 28077 (17%)   |
| Severe Obesity (BMI 40+)              | 3439 (2.0%)   | 3052 (1.8%)   |
| Pregnancy                             | 4627 (2.8%)   | 4627 (2.8%)   |
| Sickle Cell Disease                   | 49 (<0.1%)    | 58 (<0.1%)    |
| Smoking                               | 18203 (11%)   | 29294 (17%)   |
| Type 2 Diabetes Mellitus              | 12401 (7.4%)  | 12359 (7.3%)  |
| Asthma                                | 9590 (5.7%)   | 9951 (5.9%)   |
| CDC "Possible" Risk Criteria          |               |               |
| Cerebrovascular Disease               | 2541 (1.5%)   | 2620 (1.6%)   |
| Other Respiratory Disease             | 307 (0.2%)    | 359 (0.2%)    |
| Hypertension                          | 15268 (9.1%)  | 15405 (9.2%)  |
| Immunosuppression                     | 4284 (2.5%)   | 4410 (2.6%)   |
| Neurological Disease                  | 4823 (2.9%)   | 5061 (3.0%)   |
| Liver Disease                         | 2318 (1.4%)   | 2490 (1.5%)   |
| Overweight (BMI 25-30)                | 52134 (31%)   | 48890 (29%)   |
| Thalassemia                           | 1555 (0.9%)   | 1544 (0.9%)   |
| Type 1 Diabetes Mellitus              | 672 (0.4%)    | 706 (0.4%)    |

| SARS-CoV-2 - Thrombocytopenia         | 1, N = 180222 | 0, N = 180222 |
|---------------------------------------|---------------|---------------|
| Age                                   | 34 (24, 48)   | 34 (25, 48)   |
| Age Groups                            |               |               |
| 16-39                                 | 109574 (61%)  | 109574 (61%)  |
| 40-49                                 | 29949 (17%)   | 29949 (17%)   |
| 50-59                                 | 19057 (11%)   | 19057 (11%)   |
| 60-69                                 | 13223 (7.3%)  | 13223 (7.3%)  |
| 70-79                                 | 6078 (3.4%)   | 6078 (3.4%)   |
| 80+                                   | 2341 (1.3%)   | 2341 (1.3%)   |
| Sex                                   |               |               |
| F                                     | 97723 (54%)   | 97723 (54%)   |
| M                                     | 82499 (46%)   | 82499 (46%)   |
| Population Sector                     |               |               |
| General Jewish                        | 94766 (53%)   | 94766 (53%)   |
| Arab                                  | 64273 (36%)   | 64273 (36%)   |
| Ultra-Orthodox Jewish                 | 21183 (12%)   | 21183 (12%)   |
| CDC Risk Factor Count                 |               |               |
| 0                                     | 111668 (62%)  | 111668 (62%)  |
| 1                                     | 43297 (24%)   | 43297 (24%)   |
| 2                                     | 12931 (7.2%)  | 12931 (7.2%)  |
| 3                                     | 5799 (3.2%)   | 5799 (3.2%)   |
| 4+                                    | 6527 (3.6%)   | 6527 (3.6%)   |
| Flu Vaccinations in the Last 5 Years  |               |               |
| 0                                     | 125306 (70%)  | 126098 (70%)  |
| 1-2                                   | 31039 (17%)   | 30802 (17%)   |
| 3-4                                   | 13041 (7.2%)  | 12829 (7.1%)  |
| 5+                                    | 10836 (6.0%)  | 10493 (5.8%)  |
| Cancer                                | 2220 (1.2%)   | 2485 (1.4%)   |
| CDC "Certain" Risk Criteria           |               |               |
| Chronic Kidney Disease                | 9188 (5.1%)   | 9012 (5.0%)   |
| Chronic Obstructive Pulmonary Disease | 2041 (1.1%)   | 2519 (1.4%)   |
| Heart Disease                         | 6664 (3.7%)   | 6912 (3.8%)   |
| Solid Organ Transplant                | 152 (<0.1%)   | 142 (<0.1%)   |
| Obesity (BMI 30-40)                   | 32655 (18%)   | 30542 (17%)   |
| Severe Obesity (BMI 40+)              | 3773 (2.1%)   | 3367 (1.9%)   |
| Pregnancy                             | 5054 (2.8%)   | 5054 (2.8%)   |
| Sickle Cell Disease                   | 52 (<0.1%)    | 55 (<0.1%)    |
| Smoking                               | 19669 (11%)   | 31647 (18%)   |
| Type 2 Diabetes Mellitus              | 13924 (7.7%)  | 13888 (7.7%)  |
| Asthma                                | 10686 (5.9%)  | 11048 (6.1%)  |
| CDC "Possible" Risk Criteria          |               |               |
| Cerebrovascular Disease               | 3220 (1.8%)   | 3297 (1.8%)   |
| Other Respiratory Disease             | 355 (0.2%)    | 401 (0.2%)    |
| Hypertension                          | 17500 (9.7%)  | 17663 (9.8%)  |
| Immunosuppression                     | 4755 (2.6%)   | 4859 (2.7%)   |
| Neurological Disease                  | 5757 (3.2%)   | 6046 (3.4%)   |
| Liver Disease                         | 2547 (1.4%)   | 2731 (1.5%)   |
| Overweight (BMI 25-30)                | 55654 (31%)   | 52237 (29%)   |
| Thalassemia                           | 1712 (0.9%)   | 1708 (0.9%)   |
| Type 1 Diabetes Mellitus              | 767 (0.4%)    | 839 (0.5%)    |

| SARS-CoV-2 - Uveitis                  | 1, N = 182687 | 0, N = 182687 |
|---------------------------------------|---------------|---------------|
| Age                                   | 34 (25, 48)   | 34 (25, 48)   |
| Age Groups                            |               |               |
| 16-39                                 | 111105 (61%)  | 111105 (61%)  |
| 40-49                                 | 30318 (17%)   | 30318 (17%)   |
| 50-59                                 | 19222 (11%)   | 19222 (11%)   |
| 60-69                                 | 13396 (7.3%)  | 13396 (7.3%)  |
| 70-79                                 | 6212 (3.4%)   | 6212 (3.4%)   |
| 80+                                   | 2434 (1.3%)   | 2434 (1.3%)   |
| Sex                                   |               |               |
| F                                     | 99352 (54%)   | 99352 (54%)   |
| M                                     | 83335 (46%)   | 83335 (46%)   |
| Population Sector                     |               |               |
| General Jewish                        | 96172 (53%)   | 96172 (53%)   |
| Arab                                  | 64801 (35%)   | 64801 (35%)   |
| Ultra-Orthodox Jewish                 | 21714 (12%)   | 21714 (12%)   |
| CDC Risk Factor Count                 |               |               |
| 0                                     | 113024 (62%)  | 113024 (62%)  |
| 1                                     | 43882 (24%)   | 43882 (24%)   |
| 2                                     | 13093 (7.2%)  | 13093 (7.2%)  |
| 3                                     | 5908 (3.2%)   | 5908 (3.2%)   |
| 4+                                    | 6780 (3.7%)   | 6780 (3.7%)   |
| Flu Vaccinations in the Last 5 Years  |               |               |
| 0                                     | 126632 (69%)  | 127428 (70%)  |
| 1-2                                   | 31619 (17%)   | 31394 (17%)   |
| 3-4                                   | 13301 (7.3%)  | 13064 (7.2%)  |
| 5+                                    | 11135 (6.1%)  | 10801 (5.9%)  |
| Cancer                                | 2329 (1.3%)   | 2639 (1.4%)   |
| CDC "Certain" Risk Criteria           |               |               |
| Chronic Kidney Disease                | 9442 (5.2%)   | 9279 (5.1%)   |
| Chronic Obstructive Pulmonary Disease | 2118 (1.2%)   | 2585 (1.4%)   |
| Heart Disease                         | 6901 (3.8%)   | 7146 (3.9%)   |
| Solid Organ Transplant                | 186 (0.1%)    | 166 (<0.1%)   |
| Obesity (BMI 30-40)                   | 33044 (18%)   | 30905 (17%)   |
| Severe Obesity (BMI 40+)              | 3817 (2.1%)   | 3401 (1.9%)   |
| Pregnancy                             | 5244 (2.9%)   | 5244 (2.9%)   |
| Sickle Cell Disease                   | 54 (<0.1%)    | 61 (<0.1%)    |
| Smoking                               | 19834 (11%)   | 31954 (17%)   |
| Type 2 Diabetes Mellitus              | 14170 (7.8%)  | 14053 (7.7%)  |
| Asthma                                | 10839 (5.9%)  | 11201 (6.1%)  |
| CDC "Possible" Risk Criteria          |               |               |
| Cerebrovascular Disease               | 3335 (1.8%)   | 3454 (1.9%)   |
| Other Respiratory Disease             | 376 (0.2%)    | 417 (0.2%)    |
| Hypertension                          | 17824 (9.8%)  | 18005 (9.9%)  |
| Immunosuppression                     | 4924 (2.7%)   | 5008 (2.7%)   |
| Neurological Disease                  | 5948 (3.3%)   | 6265 (3.4%)   |
| Liver Disease                         | 2711 (1.5%)   | 2923 (1.6%)   |
| Overweight (BMI 25-30)                | 56394 (31%)   | 52973 (29%)   |
| Thalassemia                           | 1764 (1.0%)   | 1754 (1.0%)   |
| Type 1 Diabetes Mellitus              | 775 (0.4%)    | 857 (0.5%)    |

| SARS-CoV-2 - Vertigo                  | 1, N = 150911 | 0, N = 150911 |
|---------------------------------------|---------------|---------------|
| Age                                   | 32 (23, 44)   | 32 (23, 44)   |
| Age Groups                            |               |               |
| 16-39                                 | 100486 (67%)  | 100486 (67%)  |
| 40-49                                 | 23933 (16%)   | 23933 (16%)   |
| 50-59                                 | 13601 (9.0%)  | 13601 (9.0%)  |
| 60-69                                 | 8521 (5.6%)   | 8521 (5.6%)   |
| 70-79                                 | 3256 (2.2%)   | 3256 (2.2%)   |
| 80+                                   | 1114 (0.7%)   | 1114 (0.7%)   |
| Sex                                   |               |               |
| F                                     | 77766 (52%)   | 77766 (52%)   |
| M                                     | 73145 (48%)   | 73145 (48%)   |
| Population Sector                     |               |               |
| General Jewish                        | 80066 (53%)   | 80066 (53%)   |
| Arab                                  | 51249 (34%)   | 51249 (34%)   |
| Ultra-Orthodox Jewish                 | 19596 (13%)   | 19596 (13%)   |
| CDC Risk Factor Count                 |               |               |
| 0                                     | 100213 (66%)  | 100213 (66%)  |
| 1                                     | 35407 (23%)   | 35407 (23%)   |
| 2                                     | 8761 (5.8%)   | 8761 (5.8%)   |
| 3                                     | 3370 (2.2%)   | 3370 (2.2%)   |
| 4+                                    | 3160 (2.1%)   | 3160 (2.1%)   |
| Flu Vaccinations in the Last 5 Years  |               |               |
| 0                                     | 110263 (73%)  | 110908 (73%)  |
| 1-2                                   | 25201 (17%)   | 24977 (17%)   |
| 3-4                                   | 8932 (5.9%)   | 8825 (5.8%)   |
| 5+                                    | 6515 (4.3%)   | 6201 (4.1%)   |
| Cancer                                | 1448 (1.0%)   | 1652 (1.1%)   |
| CDC "Certain" Risk Criteria           |               |               |
| Chronic Kidney Disease                | 5943 (3.9%)   | 5950 (3.9%)   |
| Chronic Obstructive Pulmonary Disease | 1109 (0.7%)   | 1471 (1.0%)   |
| Heart Disease                         | 3700 (2.5%)   | 3883 (2.6%)   |
| Solid Organ Transplant                | 114 (<0.1%)   | 104 (<0.1%)   |
| Obesity (BMI 30-40)                   | 23998 (16%)   | 22217 (15%)   |
| Severe Obesity (BMI 40+)              | 2628 (1.7%)   | 2401 (1.6%)   |
| Pregnancy                             | 4426 (2.9%)   | 4426 (2.9%)   |
| Sickle Cell Disease                   | 39 (<0.1%)    | 48 (<0.1%)    |
| Smoking                               | 16793 (11%)   | 26720 (18%)   |
| Type 2 Diabetes Mellitus              | 8424 (5.6%)   | 8370 (5.5%)   |
| Asthma                                | 8552 (5.7%)   | 8885 (5.9%)   |
| CDC "Possible" Risk Criteria          |               |               |
| Cerebrovascular Disease               | 1516 (1.0%)   | 1557 (1.0%)   |
| Other Respiratory Disease             | 223 (0.1%)    | 247 (0.2%)    |
| Hypertension                          | 10103 (6.7%)  | 10220 (6.8%)  |
| Immunosuppression                     | 3017 (2.0%)   | 3134 (2.1%)   |
| Neurological Disease                  | 3696 (2.4%)   | 3969 (2.6%)   |
| Liver Disease                         | 1679 (1.1%)   | 1935 (1.3%)   |
| Overweight (BMI 25-30)                | 45299 (30%)   | 42372 (28%)   |
| Thalassemia                           | 1314 (0.9%)   | 1312 (0.9%)   |
| Type 1 Diabetes Mellitus              | 511 (0.3%)    | 582 (0.4%)    |

| SARS-CoV-2 - Herpes Zoster            | 1, N = 175693 | 0, N = 175693 |
|---------------------------------------|---------------|---------------|
| Age                                   | 34 (24, 47)   | 34 (24, 47)   |
| Age Groups                            |               |               |
| 16-39                                 | 108500 (62%)  | 108500 (62%)  |
| 40-49                                 | 29408 (17%)   | 29408 (17%)   |
| 50-59                                 | 18279 (10%)   | 18279 (10%)   |
| 60-69                                 | 12149 (6.9%)  | 12149 (6.9%)  |
| 70-79                                 | 5348 (3.0%)   | 5348 (3.0%)   |
| 80+                                   | 2009 (1.1%)   | 2009 (1.1%)   |
| Sex                                   |               |               |
| F                                     | 95305 (54%)   | 95305 (54%)   |
| M                                     | 80388 (46%)   | 80388 (46%)   |
| Population Sector                     |               |               |
| General Jewish                        | 91755 (52%)   | 91755 (52%)   |
| Arab                                  | 62972 (36%)   | 62972 (36%)   |
| Ultra-Orthodox Jewish                 | 20966 (12%)   | 20966 (12%)   |
| CDC Risk Factor Count                 |               |               |
| 0                                     | 109997 (63%)  | 109997 (63%)  |
| 1                                     | 42179 (24%)   | 42179 (24%)   |
| 2                                     | 12250 (7.0%)  | 12250 (7.0%)  |
| 3                                     | 5344 (3.0%)   | 5344 (3.0%)   |
| 4+                                    | 5923 (3.4%)   | 5923 (3.4%)   |
| Flu Vaccinations in the Last 5 Years  |               |               |
| 0                                     | 123234 (70%)  | 123968 (71%)  |
| 1-2                                   | 30216 (17%)   | 29980 (17%)   |
| 3-4                                   | 12315 (7.0%)  | 12132 (6.9%)  |
| 5+                                    | 9928 (5.7%)   | 9613 (5.5%)   |
| Cancer                                | 2136 (1.2%)   | 2419 (1.4%)   |
| CDC "Certain" Risk Criteria           |               |               |
| Chronic Kidney Disease                | 8689 (4.9%)   | 8516 (4.8%)   |
| Chronic Obstructive Pulmonary Disease | 1901 (1.1%)   | 2310 (1.3%)   |
| Heart Disease                         | 6095 (3.5%)   | 6330 (3.6%)   |
| Solid Organ Transplant                | 156 (<0.1%)   | 144 (<0.1%)   |
| Obesity (BMI 30-40)                   | 31294 (18%)   | 29337 (17%)   |
| Severe Obesity (BMI 40+)              | 3608 (2.1%)   | 3213 (1.8%)   |
| Pregnancy                             | 5095 (2.9%)   | 5095 (2.9%)   |
| Sickle Cell Disease                   | 54 (<0.1%)    | 62 (<0.1%)    |
| Smoking                               | 19167 (11%)   | 30829 (18%)   |
| Type 2 Diabetes Mellitus              | 12860 (7.3%)  | 12820 (7.3%)  |
| Asthma                                | 10307 (5.9%)  | 10616 (6.0%)  |
| CDC "Possible" Risk Criteria          |               |               |
| Cerebrovascular Disease               | 2924 (1.7%)   | 3034 (1.7%)   |
| Other Respiratory Disease             | 327 (0.2%)    | 352 (0.2%)    |
| Hypertension                          | 16042 (9.1%)  | 16169 (9.2%)  |
| Immunosuppression                     | 4453 (2.5%)   | 4573 (2.6%)   |
| Neurological Disease                  | 5504 (3.1%)   | 5778 (3.3%)   |
| Liver Disease                         | 2499 (1.4%)   | 2731 (1.6%)   |
| Overweight (BMI 25-30)                | 53983 (31%)   | 50692 (29%)   |
| Thalassemia                           | 1676 (1.0%)   | 1688 (1.0%)   |
| Type 1 Diabetes Mellitus              | 739 (0.4%)    | 795 (0.5%)    |

Table S6 – Risk ratios and risk differences (per 100,000 persons) of potential adverse outcomes for SARS-CoV-2 vaccination and SARS-CoV-2 Infection

Estimates and 95% confidence intervals for the risk ratio and risk difference per 1,000 patients for different potential adverse outcomes following vaccination and SARS-CoV-2 Infection. Estimates were derived 42 days after exposure using the Kaplan-Meier estimator. Confidence intervals were estimated using the percentile bootstrap method with 500 repetitions. Estimates were only calculated for cells with more than 10 outcome events across both groups. RR: risk ratio; RD: risk difference; NA, not available.

| Outcome                  | Vaccination |                            |                              |                        |                               | SARS-CoV-2 |                          |                            |                          |                               |
|--------------------------|-------------|----------------------------|------------------------------|------------------------|-------------------------------|------------|--------------------------|----------------------------|--------------------------|-------------------------------|
|                          | N           | Events in Vaccinated Group | Events in Unvaccinated Group | Risk Ratio             | Risk Difference (per 100,000) | N          | Events in Infected Group | Events in Uninfected Group | Risk Ratio               | Risk Difference (per 100,000) |
| Acute Kidney Injury      | 912,019     | 20                         | 45                           | 0.44<br>(0.23 to 0.73) | -4.58<br>(-7.83 to -1.75)     | 179,018    | 229                      | 14                         | 14.83<br>(9.24 to 28.75) | 125.41<br>(106.97 to 142.57)  |
| Anemia                   | 709,267     | 298                        | 378                          | 0.79<br>(0.67 to 0.93) | -18.68<br>(-32.13 to -6.08)   | 131,963    | 259                      | 143                        | 1.77<br>(1.46 to 2.17)   | 97.81<br>(64.75 to 131.60)    |
| Appendicitis             | 900,289     | 95                         | 66                           | 1.40<br>(1.02 to 2.01) | 5.00<br>(0.29 to 9.86)        | 176,252    | 42                       | 36                         | 1.15<br>(0.73 to 1.85)   | 3.55<br>(-7.86 to 15.15)      |
| Arrhythmia               | 856,152     | 254                        | 284                          | 0.89<br>(0.74 to 1.04) | -6.13<br>(-14.69 to 1.80)     | 169,220    | 342                      | 85                         | 3.83<br>(3.07 to 4.95)   | 166.11<br>(139.64 to 193.22)  |
| Arthritis or Arthropathy | 731,340     | 64                         | 70                           | 0.95<br>(0.65 to 1.34) | -0.76<br>(-6.26 to 4.20)      | 146,035    | 24                       | 33                         | 0.71<br>(0.40 to 1.20)   | -7.85<br>(-20.15 to 4.13)     |
| Bell's Palsy             | 923,692     | 81                         | 59                           | 1.32<br>(0.92 to 1.86) | 3.49<br>(-1.05 to 7.76)       | 180,674    | 26                       | 14                         | 1.88<br>(0.95 to 3.82)   | 7.79<br>(-0.56 to 15.50)      |
| Cerebrovascular Accident | 917,598     | 45                         | 55                           | 0.84<br>(0.54 to 1.27) | -1.56<br>(-5.31 to 2.03)      | 180,086    | 43                       | 19                         | 2.12<br>(1.23 to 3.83)   | 13.67<br>(3.67 to 22.69)      |
| Deep Vein Thrombosis     | 925,380     | 39                         | 47                           | 0.87<br>(0.55 to 1.40) | -1.09<br>(-4.54 to 2.70)      | 180,995    | 92                       | 24                         | 3.78<br>(2.50 to 6.59)   | 42.96<br>(29.93 to 56.61)     |
| Herpes Simplex           | 876,328     | 219                        | 205                          | 1.13<br>(0.95 to 1.38) | 4.85<br>(-1.89 to 12.35)      | 170,593    | 44                       | 57                         | 0.80<br>(0.53 to 1.21)   | -7.58<br>(-21.21 to 6.44)     |
| Herpes Zoster            | 888,647     | 283                        | 204                          | 1.43<br>(1.20 to 1.73) | 15.85<br>(8.15 to 24.22)      | 175,693    | 62                       | 77                         | 0.82<br>(0.58 to 1.11)   | -9.34<br>(-24.83 to 4.76)     |
| Intracranial Hemorrhage  | 933,130     | 13                         | 30                           | 0.48<br>(0.20 to 0.89) | -2.88<br>(-5.58 to -0.51)     | 182,819    | 15                       | 2                          | 6.89<br>(1.90 to 19.16)  | 7.59<br>(2.68 to 12.64)       |
| Lymphadenopathy          | 823,006     | 660                        | 279                          | 2.43                   | 78.35                         | 159,880    | 95                       | 93                         | 1.05                     | 3.20                          |



| Outcome               | Vaccination |                            |                              |                         |                                                                | SARS-CoV-2 |                          |                            |                          |                                               |
|-----------------------|-------------|----------------------------|------------------------------|-------------------------|----------------------------------------------------------------|------------|--------------------------|----------------------------|--------------------------|-----------------------------------------------|
|                       | N           | Events in Vaccinated Group | Events in Unvaccinated Group | Risk Ratio              | Risk Difference (per 100,000)                                  | N          | Events in Infected Group | Events in Uninfected Group | Risk Ratio               | Risk Difference (per 100,000)                 |
| Lymphopenia           | 938,939     | 2                          | 7                            | 0.26<br>(0.00 to 1.03)  | (2.05 to 2.78)<br>(64.07 to 89.32)<br>-0.88<br>(-1.96 to 0.02) | 183,693    | 20                       | 2                          | 9.84<br>(3.06 to 26.04)  | (-17.60 to 23.29)<br>10.35<br>(5.00 to 15.34) |
| Myocardial Infarction | 892,785     | 59                         | 60                           | 1.07<br>(0.74 to 1.60)  | 0.80<br>(-3.32 to 5.22)                                        | 176,200    | 53                       | 11                         | 4.47<br>(2.47 to 9.95)   | 25.10<br>(16.22 to 33.91)                     |
| Myocarditis           | 938,812     | 21                         | 6                            | 3.24<br>(1.55 to 12.44) | 2.72<br>(0.97 to 4.60)                                         | 183,710    | 19                       | 1                          | 18.28<br>(3.95 to 25.12) | 10.96<br>(5.57 to 15.80)                      |
| Neutropenia           | 919,291     | 20                         | 22                           | 0.87<br>(0.46 to 1.66)  | -0.52<br>(-2.77 to 1.84)                                       | 179,528    | 21                       | 9                          | 2.24<br>(1.03 to 5.89)   | 6.88<br>(0.22 to 13.53)                       |
| Other Thrombosis      | 932,469     | 12                         | 22                           | 0.46<br>(0.19 to 0.91)  | -2.25<br>(-4.63 to -0.27)                                      | 182,553    | 45                       | 9                          | 4.97<br>(2.71 to 12.69)  | 22.22<br>(14.13 to 31.80)                     |
| Paresthesia           | 827,478     | 552                        | 496                          | 1.12<br>(0.98 to 1.24)  | 10.81<br>(-1.77 to 21.37)                                      | 161,836    | 164                      | 176                        | 0.96<br>(0.76 to 1.18)   | -5.00<br>(-33.19 to 19.57)                    |
| Pericarditis          | 936,197     | 27                         | 18                           | 1.27<br>(0.68 to 2.31)  | 0.98<br>(-1.57 to 3.44)                                        | 183,158    | 22                       | 4                          | 5.39<br>(2.22 to 23.58)  | 10.94<br>(4.92 to 16.93)                      |
| Pulmonary Embolism    | 937,116     | 10                         | 17                           | 0.56<br>(0.21 to 1.15)  | -1.50<br>(-3.62 to 0.36)                                       | 183,311    | 111                      | 9                          | 12.14<br>(6.89 to 29.20) | 61.72<br>(48.52 to 75.37)                     |
| Seizures              | 913,091     | 36                         | 35                           | 0.99<br>(0.62 to 1.64)  | -0.09<br>(-2.96 to 3.07)                                       | 178,402    | 26                       | 17                         | 1.38<br>(0.77 to 2.95)   | 4.39<br>(-3.27 to 13.02)                      |
| Syncope               | 858,068     | 326                        | 267                          | 1.12<br>(0.94 to 1.34)  | 6.18<br>(-3.22 to 15.41)                                       | 168,207    | 189                      | 83                         | 2.09<br>(1.65 to 2.70)   | 62.86<br>(42.02 to 83.08)                     |
| Thrombocytopenia      | 923,123     | 56                         | 60                           | 0.94<br>(0.63 to 1.27)  | -0.57<br>(-4.63 to 2.33)                                       | 180,222    | 83                       | 19                         | 4.24<br>(2.57 to 7.65)   | 39.00<br>(26.49 to 51.26)                     |
| Uveitis               | 933,217     | 26                         | 20                           | 1.27<br>(0.68 to 2.67)  | 1.00<br>(-1.51 to 3.78)                                        | 182,687    | 7                        | 9                          | 0.80<br>(0.17 to 2.37)   | -1.17<br>(-6.70 to 4.02)                      |
| Vertigo               | 773,263     | 433                        | 395                          | 1.12<br>(0.97 to 1.28)  | 9.26<br>(-2.53 to 19.99)                                       | 150,911    | 192                      | 154                        | 1.22<br>(0.98 to 1.49)   | 26.26<br>(-2.78 to 51.24)                     |
