# Supplementary material
Source: PubMed Central journal article supplement (PMC8427535)
Supplement: NEJMoa2110475_disclosures.pdf [file NEJMoa2110475_disclosures.pdf]

Disclosure Purpose: 21-10475

## Summary of Interests

### Company or Organization

| Entity                                           | Type             | Interest Held By                                                                                                                                                          |
|--------------------------------------------------|------------------|---------------------------------------------------------------------------------------------------------------------------------------------------------------------------|
| Pfizer                                           | Grant / Contract | Other - institutional grants to Clalit Research Institute from Pfizer outside the submitted work and unrelated to COVID-19, with no direct or indirect personal benefits. |
| <i>Recipient Name:</i> Clalit Research Institute |                  | <i>Recipient Type:</i> Institution                                                                                                                                        |
| <i>Grant / Contract Description:</i>             |                  | <i>Grant / Contract Purpose:</i>                                                                                                                                          |
| <i>Additional Information:</i>                   |                  |                                                                                                                                                                           |

## Additional Questions:

- Are there other relationships or activities that readers could perceive to have influenced, or that give the appearance of potentially influencing, what you wrote in the submitted work?**  
No.
- What is the manuscript title?**  
Safety of the BNT162b2 mRNA Covid-19 Vaccine in a Nationwide Mass-Vaccination Setting
- Are you the corresponding author?**  
Yes.
  - Please list the other authors' names here.**  
Noam Barda, MD; Noa Dagan, MD; Yatir Ben-Shlomo BSc1, Eldad Kepten, PhD; Jacob Waxman, MD; Reut Ohana, MSc; Miguel A. Hernán, MD; Marc Lipsitch, DPhil; Isaac Kohane, MD; Doron Netzer, MD; Ben Reis, PhD

## Certification

I certify that the information provided in this disclosure is complete and accurate.

Disclosure Purpose: 21-10475

## Summary of Interests

### Company or Organization

| Entity                                                                                                                                                                            | Type             | Interest Held By                                                                                                                                                                                                                                                                    |
|-----------------------------------------------------------------------------------------------------------------------------------------------------------------------------------|------------------|-------------------------------------------------------------------------------------------------------------------------------------------------------------------------------------------------------------------------------------------------------------------------------------|
| Pfizer                                                                                                                                                                            | Grant / Contract | Self                                                                                                                                                                                                                                                                                |
| <i>Recipient Name:</i> Clalit Research Institute<br><i>Grant / Contract Description:</i> Institutional grants to Clalit Research Institute from Pfizer outside the submitted work |                  | <i>Recipient Type:</i> Institution<br><i>Grant / Contract Purpose:</i> Research<br><i>Additional Information:</i> Institutional grants to Clalit Research Institute from Pfizer outside the submitted work and unrelated to COVID-19, with no direct or indirect personal benefits. |

## Additional Questions:

- Are there other relationships or activities that readers could perceive to have influenced, or that give the appearance of potentially influencing, what you wrote in the submitted work?**  
No.
- What is the manuscript title?**  
Safety of the BNT162b2 mRNA Covid-19 Vaccine in a Nationwide Mass-Vaccination Setting
- Are you the corresponding author?**  
No.

## Certification

I certify that the information provided in this disclosure is complete and accurate.

# Yatir Ben Shlomo

Disclosure Purpose: 21-10475

## Summary of Interests

### Company or Organization

| Entity | Type             | Interest Held By |
|--------|------------------|------------------|
| Pfizer | Grant / Contract | Self             |

**Recipient Name:** Clalit Research Institute

**Grant / Contract Description:** Institutional grants to Clalit Research Institute from Pfizer outside the submitted work

**Recipient Type:** Institution

**Grant / Contract Purpose:** Research

**Additional Information:** Institutional grants to Clalit Research Institute from Pfizer outside the submitted work and unrelated to COVID-19 with no direct or indirect personal benefits

## Additional Questions:

- Are there other relationships or activities that readers could perceive to have influenced, or that give the appearance of potentially influencing, what you wrote in the submitted work?**  
No.
- What is the manuscript title?**  
Safety of the BNT162b2 mRNA Covid-19 Vaccine in a Nationwide Mass-Vaccination Setting
- Are you the corresponding author?**  
No.

## Certification

I certify that the information provided in this disclosure is complete and accurate.

Disclosure Purpose: 21-10475

Summary of Interests

**Company or Organization**

| Entity                                                                                                                                                                            | Type             | Interest Held By                                                                                                                                                                                                                                                                    |
|-----------------------------------------------------------------------------------------------------------------------------------------------------------------------------------|------------------|-------------------------------------------------------------------------------------------------------------------------------------------------------------------------------------------------------------------------------------------------------------------------------------|
| Pfizer                                                                                                                                                                            | Grant / Contract | Self                                                                                                                                                                                                                                                                                |
| <i>Recipient Name:</i> Clalit Research Institute<br><i>Grant / Contract Description:</i> Institutional grants to Clalit Research Institute from Pfizer outside the submitted work |                  | <i>Recipient Type:</i> Institution<br><i>Grant / Contract Purpose:</i> Research<br><i>Additional Information:</i> Institutional grants to Clalit Research Institute from Pfizer outside the submitted work and unrelated to COVID-19, with no direct or indirect personal benefits. |

Additional Questions:

- Are there other relationships or activities that readers could perceive to have influenced, or that give the appearance of potentially influencing, what you wrote in the submitted work?**  
No.
- What is the manuscript title?**  
Safety of the BNT162b2 mRNA Covid-19 Vaccine in a Nationwide Mass-Vaccination Setting
- Are you the corresponding author?**  
No.

Certification

I certify that the information provided in this disclosure is complete and accurate.

Disclosure Purpose: 21-10475

Summary of Interests

**Company or Organization**

| Entity                                                        | Type       | Interest Held By    |
|---------------------------------------------------------------|------------|---------------------|
| <a href="#">Cytel</a>                                         | Consultant | Self                |
| <i>Category:</i> Consultant<br><i>Additional Information:</i> |            | <i>Description:</i> |
| <a href="#">ProPublica</a>                                    | Consultant | Self                |
| <i>Category:</i> Consultant<br><i>Additional Information:</i> |            | <i>Description:</i> |

Additional Questions:

- Are there other relationships or activities that readers could perceive to have influenced, or that give the appearance of potentially influencing, what you wrote in the submitted work?**  
No.
- What is the manuscript title?**  
Safety of the BNT162b2 mRNA Covid-19 Vaccine in a Nationwide Mass-Vaccination Setting
- Are you the corresponding author?**  
No.

Certification

I certify that the information provided in this disclosure is complete and accurate.

**Disclosure Purpose:** 21-10475

## Summary of Interests

| Company or Organization                                                                                                                                                           |                  |                                                                                                                   |
|-----------------------------------------------------------------------------------------------------------------------------------------------------------------------------------|------------------|-------------------------------------------------------------------------------------------------------------------|
| Entity                                                                                                                                                                            | Type             | Interest Held By                                                                                                  |
| Pfizer                                                                                                                                                                            | Grant / Contract | Self                                                                                                              |
| <i>Recipient Name:</i> Clalit Research Institute<br><i>Grant / Contract Description:</i> Institutional grants to Clalit Research Institute from Pfizer outside the submitted work |                  | <i>Recipient Type:</i> Institution<br><i>Grant / Contract Purpose:</i> Research<br><i>Additional Information:</i> |

## Additional Questions:

- Are there other relationships or activities that readers could perceive to have influenced, or that give the appearance of potentially influencing, what you wrote in the submitted work?**  
No.
- What is the manuscript title?**  
Safety of the BNT162b2 mRNA Covid-19 Vaccine in a Nationwide Mass-Vaccination Setting
- Are you the corresponding author?**  
No.

## Certification

I certify that the information provided in this disclosure is complete and accurate.

**Disclosure Purpose:** 21-10475

**Summary of Interests**

I do not have any interests to disclose at this time.

**Additional Questions:**

- 1. **Are there other relationships or activities that readers could perceive to have influenced, or that give the appearance of potentially influencing, what you wrote in the submitted work?**  
No.
- 2. **What is the manuscript title?**  
Safety of the BNT162b2 mRNA Covid-19 Vaccine in a Nationwide Mass-Vaccination Setting
- 3. **Are you the corresponding author?**  
No.

**Certification**

I certify that the information provided in this disclosure is complete and accurate.

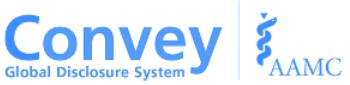

Disclosure Purpose: 21-10475

## Summary of Interests

### Company or Organization

| Entity                                                                                                                                                                                                                       | Type             | Interest Held By                                                                |
|------------------------------------------------------------------------------------------------------------------------------------------------------------------------------------------------------------------------------|------------------|---------------------------------------------------------------------------------|
| <a href="#">Andrew and Corey Morris-Singer Foundation</a>                                                                                                                                                                    | Gift             | Self                                                                            |
| <i>Description:</i> Fund for the Center for Communicable Disease Dynamics                                                                                                                                                    |                  | <i>Additional Information:</i> Institutional research support                   |
| <a href="#">Bristol-Myers Squibb</a>                                                                                                                                                                                         | Other            | Self                                                                            |
| <i>Category:</i> Other<br><i>Additional Information:</i>                                                                                                                                                                     |                  | <i>Description:</i> Honorarium for a talk                                       |
| <a href="#">Centers for Disease Control and Prevention</a>                                                                                                                                                                   | Grant / Contract | Self                                                                            |
| <i>Recipient Name:</i> President Fellows Harvard College<br><i>Grant / Contract Description:</i> Subcontract via University of Utah<br><i>Additional Information:</i>                                                        |                  | <i>Recipient Type:</i> Institution<br><i>Grant / Contract Purpose:</i> Research |
| <a href="#">Coalition for Epidemic Preparedness Innovations</a>                                                                                                                                                              | Consultant       | Self                                                                            |
| <i>Category:</i> Consultant<br><i>Additional Information:</i> unpaid                                                                                                                                                         |                  | <i>Description:</i> Member of Scientific Advisory Committee                     |
| <a href="#">Janssen Biotech</a>                                                                                                                                                                                              | Consultant       | Self                                                                            |
| <i>Category:</i> Consultant<br><i>Additional Information:</i>                                                                                                                                                                |                  | <i>Description:</i> Advisory board - Ebola vaccine studies                      |
| <a href="#">Merck</a>                                                                                                                                                                                                        | Consultant       | Self                                                                            |
| <i>Category:</i> Consultant<br><i>Additional Information:</i>                                                                                                                                                                |                  | <i>Description:</i> Advisory board - pneumococcal                               |
| <a href="#">National Institute for Health Research</a>                                                                                                                                                                       | Grant / Contract | Self                                                                            |
| <i>Recipient Name:</i> Marc Lipsitch<br><i>Grant / Contract Description:</i><br><i>Additional Information:</i>                                                                                                               |                  | <i>Recipient Type:</i> Institution<br><i>Grant / Contract Purpose:</i> Research |
| <a href="#">National Institutes of Health</a>                                                                                                                                                                                | Grant / Contract | Self                                                                            |
| <i>Recipient Name:</i> President Fellows Harvard College<br><i>Grant / Contract Description:</i><br><i>Additional Information:</i>                                                                                           |                  | <i>Recipient Type:</i> Institution<br><i>Grant / Contract Purpose:</i> Research |
| <a href="#">One Day Sooner</a>                                                                                                                                                                                               | Other            | Self                                                                            |
| <i>Category:</i> Other<br><i>Additional Information:</i> no longer affiliated                                                                                                                                                |                  | <i>Description:</i> Previously provided unpaid advice                           |
| <a href="#">Peter Diamandis / Abundance Platinum</a>                                                                                                                                                                         | Consultant       | Self                                                                            |
| <i>Category:</i> Consultant<br><i>Additional Information:</i> 5000 USD/4 h                                                                                                                                                   |                  | <i>Description:</i> consultant on COVID safety for their investor trips         |
| <a href="#">Pfizer</a>                                                                                                                                                                                                       | Grant / Contract | Self                                                                            |
| <i>Recipient Name:</i> President Fellows Harvard College<br><i>Grant / Contract Description:</i> pneumococcal epidemiology, COVID epidemiology<br><i>Additional Information:</i> also have provided unpaid scientific advice |                  | <i>Recipient Type:</i> Institution<br><i>Grant / Contract Purpose:</i> Research |
| <a href="#">SANOFI PASTEUR BIOLOGICS LLC</a>                                                                                                                                                                                 | Consultant       | Self                                                                            |
| <i>Category:</i> Consultant<br><i>Additional Information:</i>                                                                                                                                                                |                  | <i>Description:</i> Honorarium - talk                                           |
| <a href="#">Silicon Valley Community Foundation</a>                                                                                                                                                                          | Grant / Contract | Self                                                                            |
| <i>Recipient Name:</i> President Fellows Harvard College<br><i>Grant / Contract Description:</i><br><i>Additional Information:</i>                                                                                           |                  | <i>Recipient Type:</i> Institution<br><i>Grant / Contract Purpose:</i> Research |



united biomedical

Consultant

Self

**Category:** Consultant  
**Additional Information:**

**Description:** member SAB, have resigned due to inadequate time

#### Additional Questions:

1. **Are there other relationships or activities that readers could perceive to have influenced, or that give the appearance of potentially influencing, what you wrote in the submitted work?**  
No.
2. **What is the manuscript title?**  
Safety of the BNT162b2 mRNA Covid-19 Vaccine in a Nationwide Mass-Vaccination Setting
3. **Are you the corresponding author?**  
No.

#### Certification

I certify that the information provided in this disclosure is complete and accurate.

**Disclosure Purpose:** 21-10475

**Summary of Interests**

I do not have any interests to disclose at this time.

**Additional Questions:**

- 1. **Are there other relationships or activities that readers could perceive to have influenced, or that give the appearance of potentially influencing, what you wrote in the submitted work?**  
No.
- 2. **What is the manuscript title?**  
Safety of the BNT162b2 mRNA Covid-19 Vaccine in a Nationwide Mass-Vaccination Setting
- 3. **Are you the corresponding author?**  
No.

**Certification**

I certify that the information provided in this disclosure is complete and accurate.

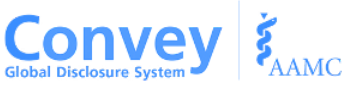

Disclosure Purpose: 21-10475

Summary of Interests

**Company or Organization**

| Entity | Type             | Interest Held By |
|--------|------------------|------------------|
| Pfizer | Grant / Contract | Self             |

*Recipient Name:* Clalit Research Institute  
*Grant / Contract Description:* Institutional grants to Clalit Research Institute from Pfizer outside the submitted work

*Recipient Type:* Institution  
*Grant / Contract Purpose:* Research  
*Additional Information:*

Additional Questions:

- Are there other relationships or activities that readers could perceive to have influenced, or that give the appearance of potentially influencing, what you wrote in the submitted work?**  
No.
- What is the manuscript title?**  
Safety of the BNT162b2 mRNA Covid-19 Vaccine in a Nationwide Mass-Vaccination Setting
- Are you the corresponding author?**  
No.

Certification

I certify that the information provided in this disclosure is complete and accurate.

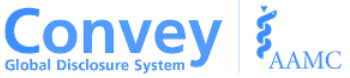

Disclosure Purpose: 21-10475

Summary of Interests

I do not have any interests to disclose at this time.

Additional Questions:

- 1. **Are there other relationships or activities that readers could perceive to have influenced, or that give the appearance of potentially influencing, what you wrote in the submitted work?**  
No.
- 2. **What is the manuscript title?**  
Safety of the BNT162b2 mRNA Covid-19 Vaccine in a Nationwide Mass-Vaccination Setting
- 3. **Are you the corresponding author?**  
No.

Certification

I certify that the information provided in this disclosure is complete and accurate.



**Disclosure Purpose:** 21-10475

## Summary of Interests

| Company or Organization                                                                                                                                                           |                  |                                                                                                                                                                                                                                                                                   |
|-----------------------------------------------------------------------------------------------------------------------------------------------------------------------------------|------------------|-----------------------------------------------------------------------------------------------------------------------------------------------------------------------------------------------------------------------------------------------------------------------------------|
| Entity                                                                                                                                                                            | Type             | Interest Held By                                                                                                                                                                                                                                                                  |
| Pfizer                                                                                                                                                                            | Grant / Contract | Self                                                                                                                                                                                                                                                                              |
| <i>Recipient Name:</i> Clalit Research Institute<br><i>Grant / Contract Description:</i> Institutional grants to Clalit Research Institute from Pfizer outside the submitted work |                  | <i>Recipient Type:</i> Institution<br><i>Grant / Contract Purpose:</i> Research<br><i>Additional Information:</i> Institutional grants to Clalit Research Institute from Pfizer outside the submitted work and unrelated to covid-19 with no direct or indirect personal benefits |

## Additional Questions:

- Are there other relationships or activities that readers could perceive to have influenced, or that give the appearance of potentially influencing, what you wrote in the submitted work?**  
No.
- What is the manuscript title?**  
Safety of the BNT162b2 mRNA Covid-19 Vaccine in a Nationwide Mass-Vaccination Setting
- Are you the corresponding author?**  
No.

## Certification

I certify that the information provided in this disclosure is complete and accurate.
